# Supplementary material
Source: PubMed Central journal article supplement (PMC3401359)
Supplement: NIHMS375946-supplement-1_si_001.pdf [file NIHMS375946-supplement-1_si_001.pdf]

# Expanding the Genetic Code of *Caenorhabditis elegans* Using Bacterial aminoacyl-tRNA Synthetase/tRNA Pairs

Angela R. Parrish<sup>1</sup>, Xingyu She<sup>1</sup>, Zheng Xiang<sup>1</sup>, Irene Coin<sup>1</sup>, Zhouxin Shen<sup>3</sup>, Steven P. Briggs<sup>3</sup>, Andrew Dillin<sup>2</sup>, Lei Wang<sup>1,\*</sup>

<sup>1</sup> Jack H. Skirball Center for Chemical Biology and Proteomics, The Salk Institute for Biological Studies, 10010 N. Torrey Pines Road, La Jolla, CA 92037 USA

<sup>2</sup> Howard Hughes Medical Institute, Glenn Center for Aging Research, The Salk Institute for Biological Studies, La Jolla, CA 92037 USA

<sup>3</sup> Section of Cell and Development Biology, University of California, San Diego, La Jolla, CA 92093, USA.

## Supporting Methods

**Plasmid Construction.** Suppression plasmids (*unc-54p::RS*) were constructed using vector pPD30.38 from the Fire lab as a backbone. The synthetase genes (*I*) were amplified by PCR using the following primers: LeuRSfo 5'- AGCTAGCGGTAGAAAA AATGCAAGAGCAATACCGCC -3' and LeuRSrev 5'-GAGCTCTTAGCCAACGACC AGATTGAGG -3'; TyrRSfo 5'- AGCTAGCGGTAGAAAAAATGGCAAGCAGTAA CTTGATTAAACAATTGCAAG -3' and TyrRSrev 5'- AGAGCTCTTATTTCCAGC AAATCAGACAGTAATTCTTTTTACCGC -3'. The Uaa synthetase is amplified with the same primers (TyrRS set for OmeRS, LeuRS set for DanRS). The *unc-54p::RS* plasmids were produced by inserting each RS, using the restriction sites introduced in the PCR primers, in the *Nhe I/Sac I* sites between *unc-54* promoter and *unc-54* 3'UTR. To

insert the promoters and tRNAs, a linker was cloned with the primers Linkfo 5'-CAGAGATCTCCATGGGAACGCTGACGTCATCAACCCGC -3' and Linkrev 5'-GAGACCACGGATCCCCGCCCGGATGGTGGGAATCGG -3'. The suppressor tRNAs were cloned using the following primers: tRNAYfo 5'- CAGGATCCCCGGTGGGG TTCCCGAGCGGC -3' and tRNAYrev 5'- TGACTAGTATGAAAAATGCTGTAAA TTCAAAAAGATATGGTGGGGGAAGGATTCGAACC -3'; tRNALfo 5'- CCACCATCCGGGCGGGGATCCGTGGTCTCATAACAG -3' and tRNALrev 5'- TAACTAGTATGAAAAATGCTGTAAATTCAAAAAGATATACCCGGAGCGGGAC TTGAACC -3'. Both rev primers for cloning tRNA have the *C. elegans* lysyl tRNA 3' flanking sequence (2) for correct termination and processing. Overlap PCR using the linker PCR fragment and each of the tRNA fragments was performed, and this cassette was cloned into pPD30.38 using the *BamH* I/*Spe* I in the vector, and digesting the overlap PCR product with *Bgl* II/*Spe* I. This generated an *Nco* I site 5' of the linker, and a *BamH* I site in between the linker and the tRNA, and abolishing the original *BamH* I site. The tRNA promoter candidates (500 bp each) were amplified from *C. elegans* genomic DNA with the following primers: cen4fo 5'- TACCATGGCGACACGATCTTATTTT GATAAAGAACTTGG -3' and cen4rev 5'- AGGATCCGTGCAATAGGAGGCGTTT ATATAGGG -3'; cen38fo 5'- TACCATGGCCAATTCTCCATTATGAGCAATTG CTACAGTACC -3' and cen38rev 5'- ATGGATCCATTGAACTGGCGTCTCGT GGGTCAC -3'; rpr1fo 5'- TACCATGGGGCTCAGCCTCAACCAATTTTTAGTG -3' and rpr1rev 5'- AGGATCCACGCGCGCCGCGTCGTT -3'. These promoters were inserted between the *Nco* I and *BamH* I sites, taking care to retain the spacing of the +1 nucleotide and the TATA box, if present, in the primer design.

The plasmid for MosSCI integration of *unc-54p::mCherryTAG156* was generated by creating the amber mutation using the primers TAG156fo 5'- GAGCGGATGTAG CCGAGGACG -3' and TAG156rev 5'- CGTCCTCGGGCTACATCCGCTC -3' for overlapping PCR with the primers mCherryfo 5'- TAGGTACCGGTAGAAAAAAT GGTGAGCAAGGGCGAGGAGG -3' and mCherryrev 5'-AGAATTCTTACTTGTACA GCTCGTCCATGCCG -3'. This PCR product was cloned in place of the GFP coding sequence in vector pPD95.77, using the *EcoR* I/*Kpn* I sites which were included on the primers. The *unc-54* promoter was amplified from pPD30.38 using the primers unc54pfo 5'- CCAAGCTTGTCTTCTTCTAAATTCCC -3' and unc54prev 5'- ATGGTACCCAA GGGTCCTCCTGAAAATGTTC -3' and inserted using *Hind* III/*Kpn* I sites also present on these primers. This entire fragment, including the *unc-54* 3' UTR was PCR amplified with the primers unc54Xhofo 5'- AACTCGAGCCATAAAAATCCCGAAACTC CTTCCCTC -3' and uncChrev 5'- CGTCATCACCGAAACGCGCG -3' and cloned into the MosSCI vector pCFJ151 (from E. Jorgensen) using *Xho* I and *Spe* I sites found on the primers, to create *p5605-unc-54p::mCherryTAG156*.

The plasmids for MosSCI integration of *unc-54p::luciferaseTAG185* were generated by PCR amplifying the *unc-54* promoter from *unc-54p::mCherryTAG156* using the primers GWunc54fo 5'-GGGGACAACCTTTGTATAGAAAAGTTGCCCATAAAAT CCGAAACTCCTTCC -3' and GWunc54rev 5'- GGGGACTGCTTTTTTTGTACAAA CTTGCAAGGGTCCTCCTGAAAATGTTC -3' containing *attB4* and *attB1r* flanking sites. The *Photinus pyralis* luciferase gene was amplified from pECL1 (3) using the primers GWlucfo 5'- GGGGACAAGTTTGTACAAAAAAGCAGGCTGGTAGAAA AAATGGAAGACGCC -3' and GWlucrev 5'- GGGGACCACTTTGTACAAGAAA

GCTGGGTTTACAATTTGGACTTTCCGCCC -3' containing *attB1* and *attB2* sites. The TAG mutation at position 185 was introduced by overlapping PCR with the primers lucTAG185fo 5'- CGATTTTGTACCAGAGTAGTTTGATCGTGACAAAAC -3' and lucTAG185rev 5'- GTTTTGTCACGATCAAACACTCTGGTACAAAATCG -3' and the GWluc primers. These PCR products were recombined using BP Clonase II into the Gateway vectors pDONR P4-P1r and pDONR221, respectively (Invitrogen). These two plasmids, as well as a plasmid containing the *unc-54* 3' UTR flanked by *attR2* and *attL3* sequences (from E. Jorgensen) were recombined with LR Clonase II Plus (Invitrogen) with a MosSCI vector containing homologous regions surrounding the *ttTi4348* locus on chromosome I in *C. elegans* (from E. Jorgensen) to create *p4348-unc-54p::luciferaseTAG185*.

The plasmids for integrating 3 copies of *rpr-1p::tRNA<sup>Leu</sup><sub>CUA</sub>* were made using the Gateway system. Identical copies of the gene cassette were PCR amplified for recombination from the *unc-54p::RS* plasmids with the plasmids. To amplify *rpr-1p::tRNA<sup>Leu</sup><sub>CUA</sub>* the following primers were used as pairs: B4RNAsePfo 5'- GGGGACAAC TTTGTATAGAAAAGTTGGGCTCAGCCTCAACCAATTTTTAGTG -3' and B1rLtRNArev 5'- GGGGACTGCTTTTTTGTACAAACTTGATGAAAAATGCTGT AAATTCAAAAAGATATACCCGG -3'; B2RNAsePfo 5'- GGGGACAAGTTTGTAC AAAAAAGCAGGCTGGCTCAGCCTCAACCAATTTTTAGTG -3' and B1LtRNArev 5'- GGGGACCACTTTGTACAAGAAAGCTGGGTATGAAAAATGCTGTAAATT CAAAAGATATACCCGG -3'; B2rRNAsePfo 5'- GGGGACAGCTTTCTTGTAC AAAGTGGGGCTCAGCCTCAACCAATTTTTAGTG -3' and B3LtRNArev 5'- GGGGACAACCTTTGTATAATAAAGTTGATGAAAAATGCTGTAAATTCAAAAAG

ATATACCCGG -3'. Each PCR product was recombined into the appropriate Gateway entry vector with BP Clonase II (Invitrogen) and recombined into MosSCI vector pCFJ150 (from E. Jorgensen) with LR Clonase II Plus (Invitrogen) to create *p5605-rpr-Ip:: tRNA<sup>Leu</sup><sub>CUA</sub> 3x*. The single copy was cut from *unc-54p::LeuRS* using *Nco* I, blunted using Klenow extension (NEB), and then cut with *Spe* I. The *rpr-Ip:: tRNA<sup>Leu</sup><sub>CUA</sub>* fragment was cloned into pCFJ151, which was cut with *Xho* I, blunted, and then cut with *Spe* I, to generate *p5605-rpr-Ip:: tRNA<sup>Leu</sup><sub>CUA</sub>*. The *unc-54p::LeuRS* gene cassette was PCR amplified with the primers *unc54Xhofo* 5'- AACTCGAGCCCATAAAATCCCG AACTCCTTCCCTC -3' and *uncRSrev* 5'- GCCTAATTTCTTTGCTTATTTTT ACTAGTTTTCTTCC -3'. This fragment was digested with *Xho* I and *Spe* I and ligated into pCFJ178 (from E. Jorgensen) for MosSCI integration into chromosome IV to generate *p10882-unc-54p::LeuRS*.

The triple *rpr-Ip:: tRNA<sup>Tyr</sup><sub>CUA</sub>* cassette was constructed using the same forward primers as the *rpr-Ip:: tRNA<sup>Leu</sup><sub>CUA</sub>* cassette and the reverse primers *B1rYtRNArev* 5'- GGGGACTGCTTTTTTGTACAAACTTGATGAAAAATGCTGTAAATTCAAAAAG ATATGGTGGG -3'; *B2YtRNArev* GGGGACCACTTTGTACAAGAAAGCTGGGT ATGAAAAATGCTGTAAATTCAAAAAGATATGGTGGG -3'; and *B3YtRNArev* 5'- GGGGACAACCTTTGTATAATAAAGTTGATGAAAAATGCTGTAAATTCAAAAAG ATATGGTGGG -3'. This fragment was cut from the destination vector with *Avr* II/*Xho* I and ligated into pCFJ178 for MosSCI integration into Chromosome IV, to generate *p10882-rpr-Ip:: tRNA<sup>Tyr</sup><sub>CUA</sub> 3x*.

The *Luciola cruciate* (Japanese) firefly luciferase plasmid (*unc-54p::JFFluciferaseTAG158*) for MosSCI integration was amplified from pJFF12 (from J.

Noel) with the primers JFFlucfo 5'- AAGGATCCATGGAAAACATGGAAAAT GATGAAAACATTGTGG -3' and JFFlucrev 5'- AAGCGGCCGCCAGAGGAGCCCA TTTTGGCCACCGGTTTTTTCAGAA -3' and cloned into pIRES-hrGFP II (Agilent Technologies) using *BamH* I and *Not* I, in frame with the 3xFLAG tag present on the vector. The TAG mutation was made with overlapping PCR using the above primers and JFFTAG158fo 5'- CCTGGATAGCAAATAGGATTATCGTGGTTATCAG -3' and JFFTAG158rev 5'- CTGATAACCACGATAATCCTATTTGCTATCCAGG -3' and cloned into the same vector. The full gene with the 3xFLAG was amplified with the primers GWJFFlucfo 5'- GGGGACAAGTTTGTACAAAAAAGCAGGCTGGTAG AAAAAACCATGGAAAACATGGAAAATGATGAAAACATTGTGG -3' and GWFLAGrev 5'- GGGGACCACTTTGTACAAGAAAGCTGGGTCGTTCGAGGAA TTGCTATTATTTGTCGTCAT -3' and recombined into pDONR221 with BP Clonase II (Invitrogen). This entry plasmid was recombined with the Gateway vector above containing the *unc-54* promoter and an entry vector containing the *tbb-2* 3'UTR followed the *gpd-2* operon linker and a histone H2B:GFP fusion (pCFJ236, from E. Jorgensen) to generate a MosSCI vector targeting Chromosome I, to generate *p4348-unc-54p::JFFluciferaseTAG158::H2B::GFP*.

All fragments were PCR amplified with phusion polymerase (NEB), and all constructs were sequenced before injection. All Gateway reactions are done according to the manufacturer's instructions (Invitrogen).

## **Mass Spectrometric Analysis of the JFFluc Protein and the Orthogonality of the OmeRS**

To assess the orthogonality of the OmeRS in *C. elegans* and to verify the incorporation of OmeY into the JFFluc protein, we analyzed the JFFluc protein expressed in strain LWA717 with mass spectrometry.

Expression and immunoprecipitation of the JFFluc protein from LWA717 animals were described in the text and methods section. After incubating the anti-FLAG beads with the lysate from the animals, the beads were washed extensively and resuspended in 100  $\mu$ L 50 mM Hepes buffer (pH 7.2). Proteins were reduced and alkylated using 1 mM Tris(2-carboxyethyl) phosphine (Fisher, AC36383) at 94 °C for 5 minutes and 2.5 mM iodoacetamide (Fisher, AC12227) at 37 °C in the dark for 30 minutes, respectively. Proteins were digested on beads with 1  $\mu$ g Lys-C (Roche) at 37 °C overnight.

Automated 2D nanoflow LC-MS/MS analysis was performed using an LTQ tandem mass spectrometer (Thermo Electron Corporation, San Jose, CA) employing automated data-dependent acquisition. An Agilent 1100 HPLC system (Agilent Technologies, Wilmington, DE) was used to deliver a flow rate of 500 nL min<sup>-1</sup> to the mass spectrometer through a splitter. Chromatographic separation was accomplished using a 3 phase capillary column. Using a pressure cell constructed in-house, 5  $\mu$ m Zorbax SB-C18 (Agilent) packing material was packed into a fused silica capillary tubing (200  $\mu$ m ID, 360  $\mu$ m OD, 10 cm long) to form the first dimension RP column (RP1). A similar column (200  $\mu$ m ID, 5 cm long) packed with 5  $\mu$ m PolySulfoethyl (PolyLC) packing material was used as the SCX column. A zero dead volume 1  $\mu$ m filter (Upchurch, M548) was attached to the exit of each column for column packing and connecting. A fused silica capillary (200  $\mu$ m ID, 360  $\mu$ m OD, 20 cm long) packed with 3.5  $\mu$ m Zorbax SB-C18 (Agilent) packing material was used as the analytical column

(RP2). One end of the fused silica tubing was pulled to a sharp tip with the ID smaller than 1  $\mu\text{m}$  using a laser puller (Sutter P-2000) as the electro-spray tip. The peptide mixtures were loaded onto the RP1 column using the same in-house pressure cell. To avoid sample carry-over and maintain reproducibility, a new set of three columns with the same length was used for each sample. Peptides were first eluted from the RP1 column to the SCX column using a 0 to 80% acetonitrile gradient for 150 minutes. Then, peptides were fractionated by the SCX column using a series of 8 step salt gradients (10 mM, 15 mM, 20 mM, 30 mM, 50 mM, 70 mM, 100 mM, and 1 M ammonium acetate for 20 minutes), followed by high resolution reverse phase separation using an acetonitrile gradient of 0 to 80% for 120 minutes.

Each sample was analyzed using mixed data-dependent and MRM (Multiple Reaction Monitoring) scan modes. The mass spectrometer was programmed to perform data-dependent MS/MS scans on the 5 most intense ions from the full MS scan (400-1600 Da), followed by 4 MRM scans of the non-substituted (Valine 158) peptide or OMe-tyrosine substituted peptide:  $m/z$  928.4 (OMeY 158, 2+), 619.3 (OMeY 158, 3+), 889.4 (Val 158, 2+), and 593.3 (Val 158, 3+).

Raw data were extracted and searched using Spectrum Mill (Agilent, version A.04.00). MS/MS spectra with a sequence tag length of 1 or less were considered poor spectra and discarded. The filtered MS/MS spectra were searched against a customized protein database containing common protein contaminants (keratins, trypsin, etc.) and the *Luciola cruciata* luciferase. The enzyme parameter was limited to full lys-C peptides with a maximum mis-cleavage of 1. All other search parameters were set to SpectrumMill's default settings (carbamidomethylation of cysteines, +/- 2.5 Da for



precursor ions, +/- 0.7 Da for fragment ions, and a minimum matched peak intensity (SPI) of 50%). Substitution of all 20 amino acid to OMeY was defined as variable modifications. A maximum of 1 substitution per peptide was used. Search results for individual spectra were automatically validated using the filtering criteria listed in Table S1.

Table S1. Filtering criteria for autovalidation of database search results.

| Mode            | Protein score | 1+ peptide<br>(Score, SPI%) | 2+ peptide<br>(Score, SPI%) | 3+ peptide<br>(Score, SPI%) |
|-----------------|---------------|-----------------------------|-----------------------------|-----------------------------|
| Protein Details | >20           | >11, >50%                   | >11, >50%                   | >13, >50%                   |
| Peptide         | NA            | >13, >50%                   | >13, >50%                   | >15, >50%                   |

For the purpose of verifying the incorporation of OmeY at site 158, we unfortunately did not detect the peptide containing this position. We then repeated the experiment with wild type *Luciola cruciata* luciferase purified from strain LWA1580. Again the peptide containing Val at position 158 was not detectable, indicating that this peptide has very weak ionization ability and is unlikely to be detected by the mass spectrometer.

We did identify 11 unique peptides from the JFFluc protein purified from strain LWA717. These peptides were colored in red in Figure S8, and their MS-MS spectra were shown in Figure S9. To assess whether the OmeRS is orthogonal in *C. elegans* cells, we interrogated whether OmeY was mis-incorporated at any position in these 11 peptides. A comprehensive search for OmeY substitution of all 20 amino acids was performed, and no peptide was found to have OmeY misincorporation. All identified peptides were from the non-substituted, wild-type luciferase sequence. These results support that the OmeRS did not mischarge OmeY onto endogenous *C. elegans* tRNAs and thus is orthogonal.

## References

1. Wang, Q., and Wang, L. (2008) New Methods Enabling Efficient Incorporation of Unnatural Amino Acids in Yeast, *J. Am. Chem. Soc.* *130*, 6066-6067.
2. Tranquilla, T. A., Cortese, R., Melton, D., and Smith, J. D. (1982) Sequences of four tRNA genes from *Caenorhabditis elegans* and the expression of *C. elegans* tRNA<sup>Leu</sup> (anticodon IAG) in *Xenopus* oocytes, *Nucleic Acids Res* *10*, 7919-7934.
3. Lagido, C., Pettitt, J., Porter, A. J., Paton, G. I., and Glover, L. A. (2001) Development and application of bioluminescent *Caenorhabditis elegans* as multicellular eukaryotic biosensors, *FEBS Lett* *493*, 36-39.

## Supporting Figures

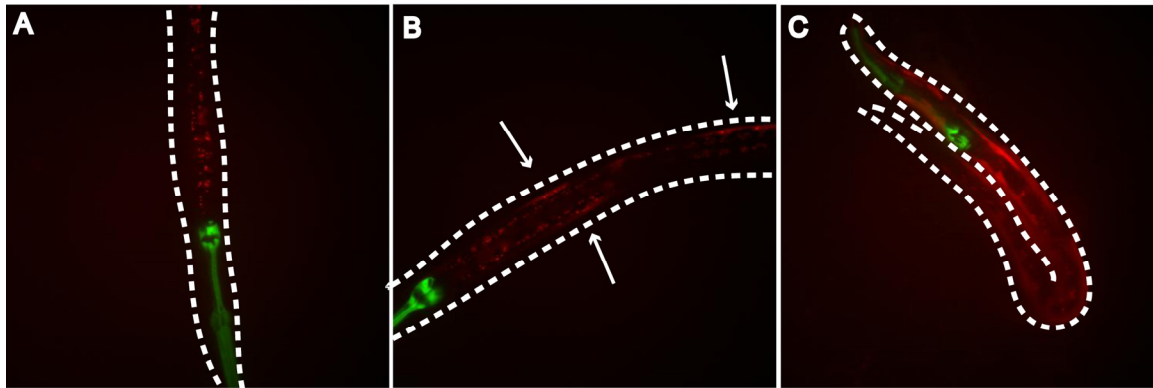

**Figure S1. Integration of the orthogonal tRNA/RS array leads to uniform mCherry expression when crossed to the reporter strain.** (A) LWA1565 with the  $tRNA_{CUA}^{Leu}$ /DanRS array integrated. Red dots are intestinal autofluorescence. (B) mCherry reporter line LWA1560 with extrachromosomal array  $wlEx1565[unc-54::DanRS_{rpr-1}::tRNA_{CUA}^{Leu} + myo-2::GFP]$  exposed to 2 mM Ala-DanAla dipeptide. Arrows point to individual red muscle cells; mCherry expression was mosaic. (C) LWA1565 exposed to 2 mM Ala-DanAla dipeptide. Note red fluorescence throughout head and body, rather than isolated muscles. All animals were raised in liquid culture for 1 generation at 15 °C. Dashed lines indicate the outline of the worm. All images are confocal Z stacks and representative of each genotype at larval stage 3-4.

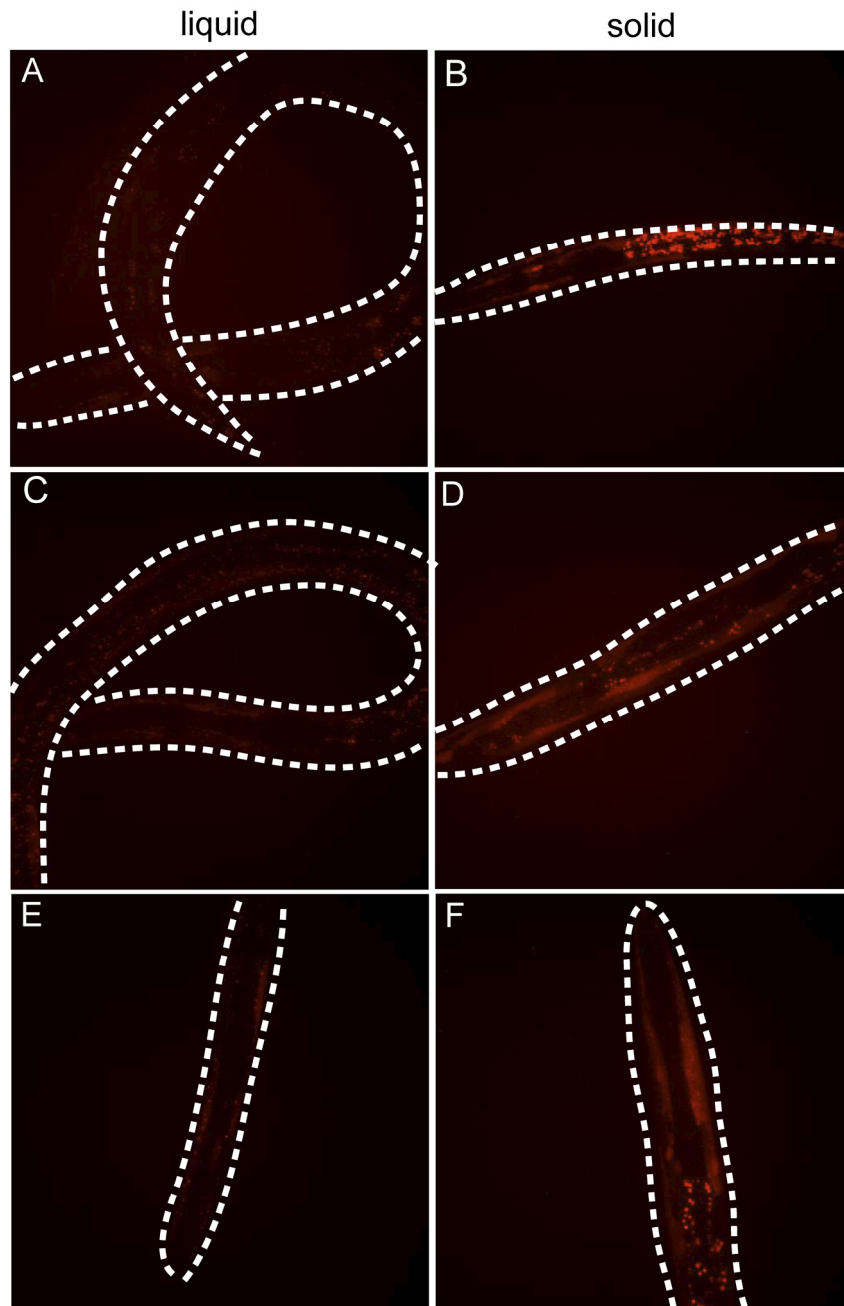

**Figure S2. Addition of Uaa to solid media leads to greater Uaa incorporation than in liquid media.** All animals are LWA1565. (A-B) 0.5 mM Ala-DanAla dipeptide. (C-D) 1 mM Ala-DanAla dipeptide. (E-F) 2.5 mM Ala-DanAla dipeptide. Punctate dots are intestinal autofluorescence. In each case, there was more uniform and bright mCherry expression when delivered with solid food, and animals appeared healthier on solid food.

All animals were raised for 1 generation at 15 °C. Dashed lines indicate the outline of the worm. All images are confocal Z stacks and the healthiest animals from each condition were imaged, ranging from larval stage 2-4.

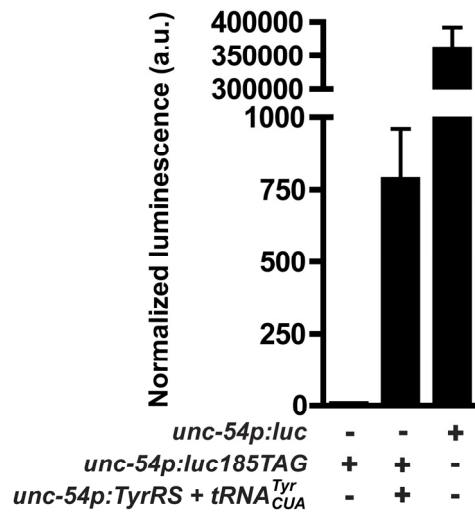

**Figure S3. A singly integrated luciferase gene can be used to quantitatively report amber suppression in body wall muscle.** Luciferase activity was readily detectable when the wild type luciferase gene was expressed from a single integrated copy in body wall muscle by the *unc-54* promoter. LWA1850 has a singly integrated luciferase gene with a TAG mutation at permissive site 185 driven by the *unc-54* promoter. No luciferase activity was detected from this reporter strain. Only when crossed to a strain with an integrated *E. coli* tRNA<sub>CUA</sub><sup>Tyr</sup>/TyrRS array was luciferase detectable. Animals were grown in duplicate. Luminescence was normalized to total protein concentration. Error bars represent s.e.m.; n ≥ 2.

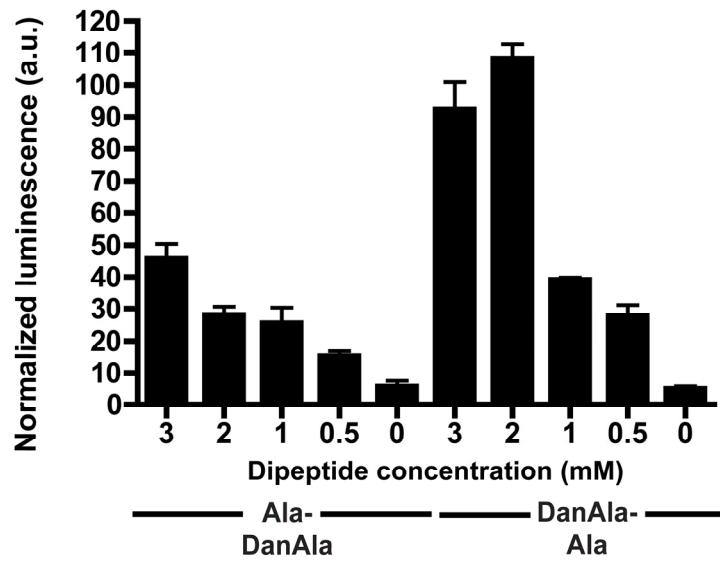

**Figure S4. The orientation of Uaa dipeptide affects Uaa incorporation.** LWA1031 showed differential luciferase activity depending on the Uaa position in the dipeptide. Animals were exposed to the indicated concentrations of dipeptides for 3 generations at 15 °C on solid media. Animals were grown in duplicate. Luminescence was normalized to total protein concentration. Error bars represent s.e.m.;  $n \geq 2$ .

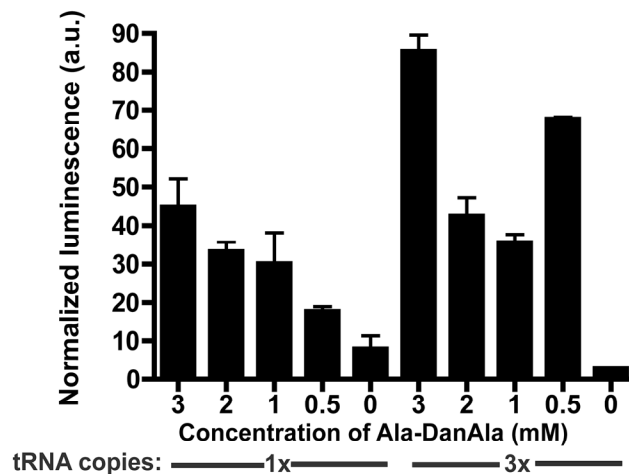

**Figure S5. tRNA copy number affects Uaa incorporation with Ala-DanAla dipeptide.** LWA1031 (with 1 copy of tRNA) or LWA1856 (with the 3x cassette of the tRNA) were

grown on the indicated concentrations of Ala-DanAla dipeptide. With additional tRNAs a moderate increase of luciferase activity was observed. Animals were grown in duplicate at 15 °C on solid media. Luminescence was normalized to total protein concentration. Error bars represent s.e.m.;  $n \geq 2$ .

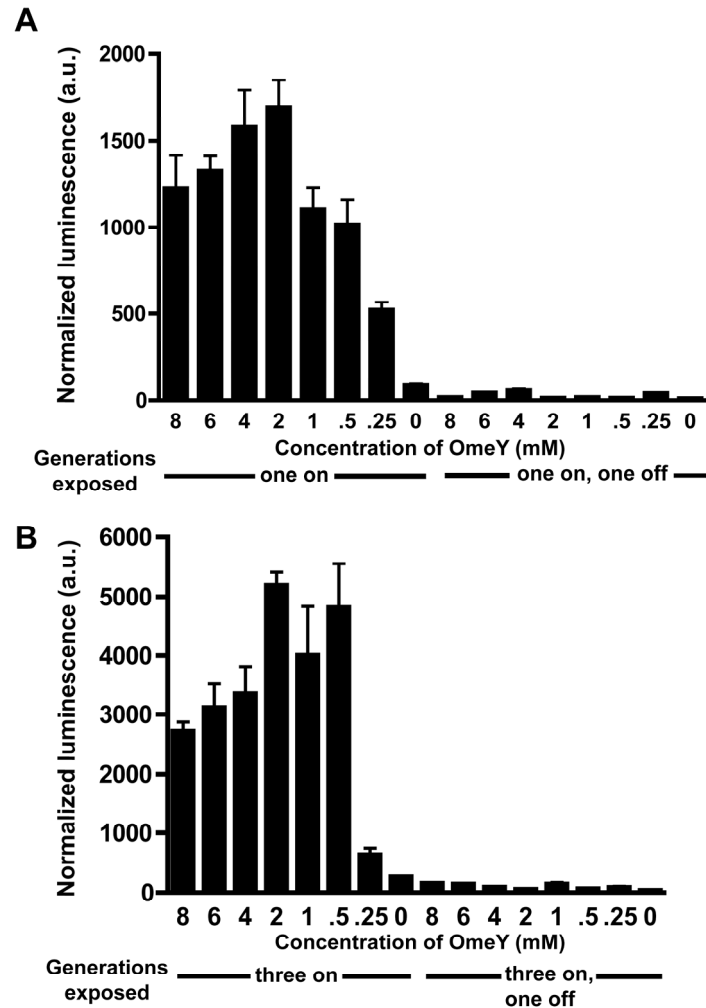

**Figure S6. Withdrawal of Uaa for one generation precludes Uaa incorporation.** (A) LWA1852 was grown at the indicated concentrations of OmeY for 1 generation in duplicate. Animals were removed from each plate to 0 mM plates for 1 generation and assayed. (B) LWA1852 was grown at the indicated concentrations of OmeY for 3

generations in duplicate. Animals were removed from each plate to 0 mM plates for 1 generation and assayed. All animals were grown in duplicate at 15 °C on solid media. After 1 generation in the absence of Uaa, the luciferase activity dropped back to background levels in all cases. Error bars represent s.e.m.; n ≥ 2.

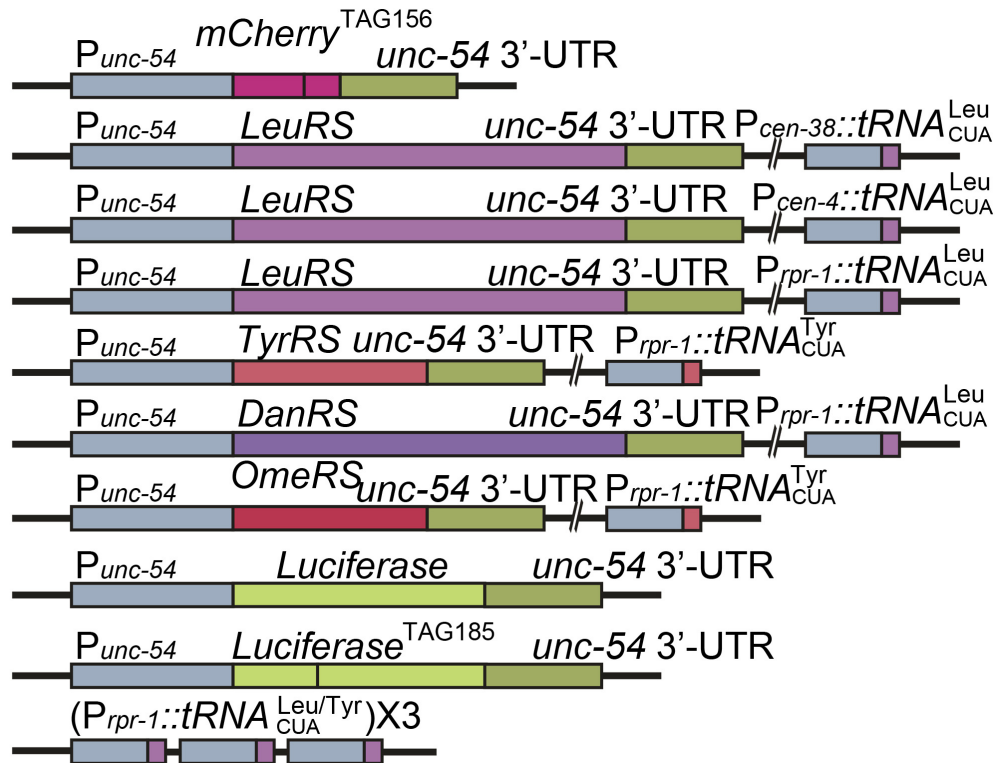

**Figure S7. Constructs generated.** Representation of the plasmids used to make the animals in this work. All tRNA 3' flanking sequences come from *C. elegans* tRNA<sup>Lys</sup>.



|     |                                             |                                           |                                |                                 |                                      |                         |                                                                        |                                      |     |
|-----|---------------------------------------------|-------------------------------------------|--------------------------------|---------------------------------|--------------------------------------|-------------------------|------------------------------------------------------------------------|--------------------------------------|-----|
| 1   | MENMENDENI                                  | VVGPKPFYPI                                | EESGAGTQLR                     | <u>K</u> YMERYAKLG              | AIAFTNAVTVG                          | VDYSYAEYLE              | <u>K</u> SCCLGKALQ                                                     | NYGLVVDGRI                           | 80  |
| 81  | ALCSENC <del>EE</del> F                     | FIPVLIAGLFI                               | GVGVAPTNEI                     | YTLREL <del>VH</del> SL         | GISKPTIVFS                           | SKKGLD <del>K</del> VIT | VQKT <del>VTTIK</del> T                                                | <b>IVILDSK</b> V <del>VDY</del>      | 160 |
| 161 | RGYQC <del>LD</del> TFI                     | <u>K</u> RNTPPGFQA                        | SSF <del>K</del> <b>TVEVDR</b> | <u>K</u> EQVALIMNS              | SGSTGLF <del>K</del> GV              | QLTHENIVTR              | FSHARDPIYG                                                             | NQVSPGTAVL                           | 240 |
| 241 | TVVFFHHGFG                                  | MFTTLGYLIC                                | GFRV <del>VMLT</del> KF        | DEETFL <del>K</del> TLQ         | DY <del>K</del> CTSVILV              | PTLFAILN <del>K</del> S | <b>ELLNKYDLSN</b>                                                      | <b>LVEIASGGAP</b>                    | 320 |
| 321 | <b>LSK</b> EVGEAVA                          | RRFNLP <del>GV</del> RQ                   | GYGLTET <del>TS</del> A        | IIITPEGDDK                      | PGASG <del>K</del> VVPL              | FKAK <del>V</del> IDLDT | <b>KK</b> SLGPNRRG                                                     | EVC <del>V</del> KG <del>P</del> MLM | 400 |
| 401 | <u>K</u> GYVNNPEAT                          | <u>K</u> ELIDEEGWL                        | <b>HTGDIGYDE</b>               | <b>EKHFFIVDRL</b>               | <u>K</u> SLIKY <del>K</del> GYQ      | <b>VPPAELESVL</b>       | <b>LQHPSIFDAG</b>                                                      | <b>VAGVPDPVAG</b>                    | 480 |
| 481 | <b>ELPGAVVVLE</b>                           | <u>S</u> GKNMTE <del>K</del> EV           | <b>MDYVASQVSN</b>              | <u>A</u> KRLRG <del>G</del> VRF | VDEVF <del>K</del> G <del>L</del> TG | <u>K</u> IDGRAIREI      | <u>L</u> K <del>K</del> P <del>V</del> A <del>K</del> M <del>G</del> S | SGGRDY <del>K</del> DDD              | 560 |
| 561 | <u>D</u> KDY <del>K</del> DDDD <del>K</del> | <u>D</u> Y <del>K</del> DDDD <del>K</del> |                                |                                 |                                      |                         |                                                                        |                                      | 578 |

**Figure S8. Mass spectrometric analysis of the JFFluc protein purified from strain LWA717.** Eleven unique peptides, highlighted in red, were identified. All identified peptides were from the luciferase sequence as indicated. No peptides with OmeY misincorporated at any position in these peptides were found, suggesting that the OmeRS did not mischarge the endogenous *C. elegans* tRNA with the Uaa.

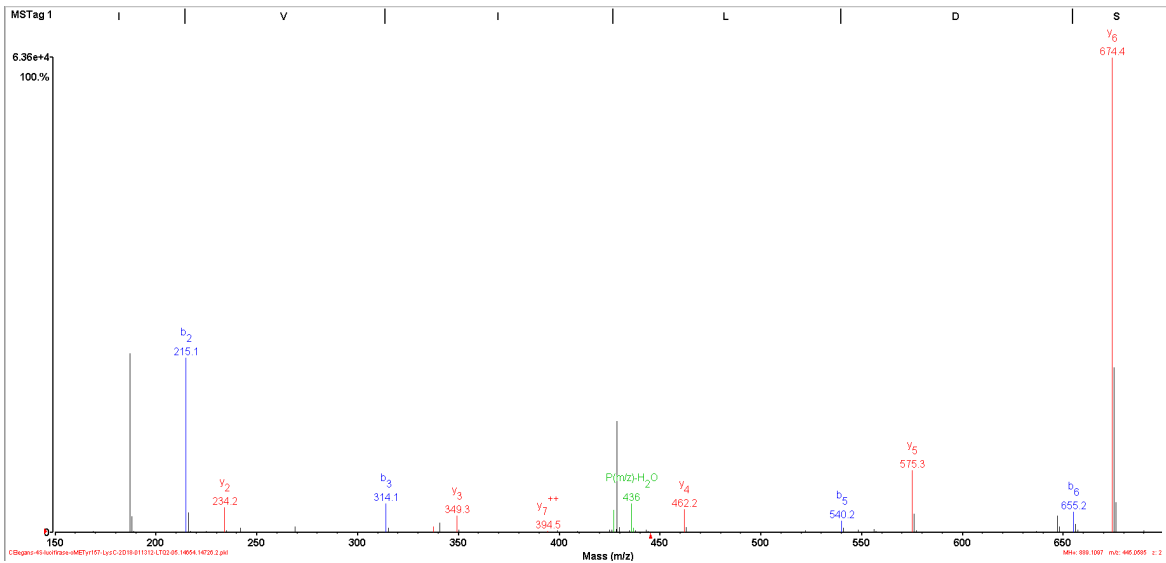

Peptide: (K)TIVILDSK(V); Score: 12.38;  
Spectral count: 3; Start aa position: 150.

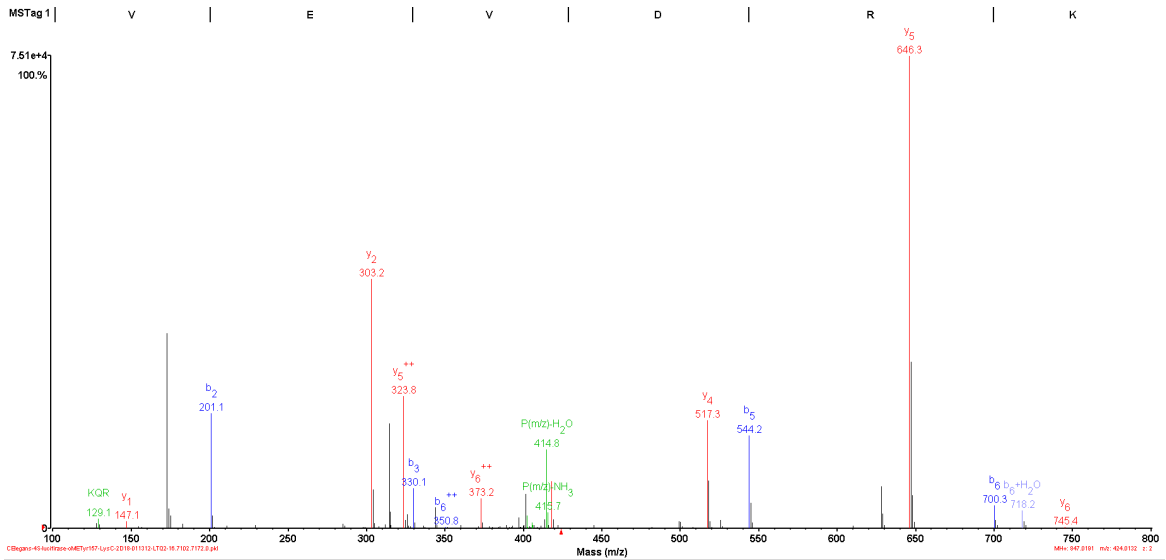

Peptide: (K)TVEVDRK(E); Score: 14.64;  
Spectral count: 6; Start aa position: 185.

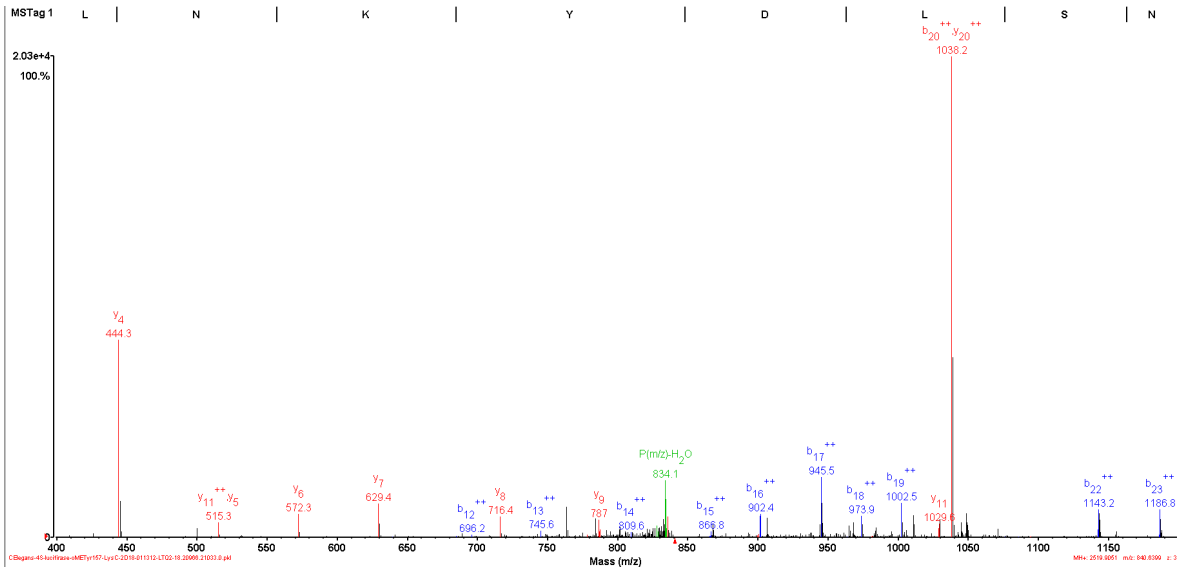

Peptide: (K)SELLNKYDLSNLVEIASGGAPLSK(E); Score: 14.36;  
Spectral count: 1; Start aa position: 300.

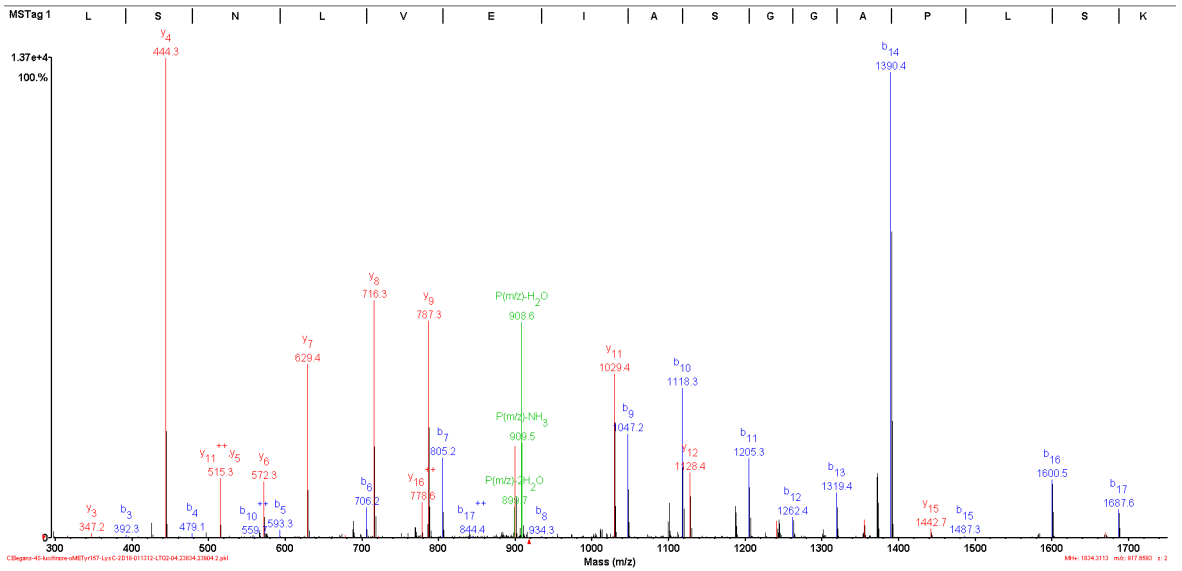

Peptide: (K)YDLSNLVEIASGGAPLSK(E); Score: 21.94;  
Spectral count: 23; Start aa position: 306.

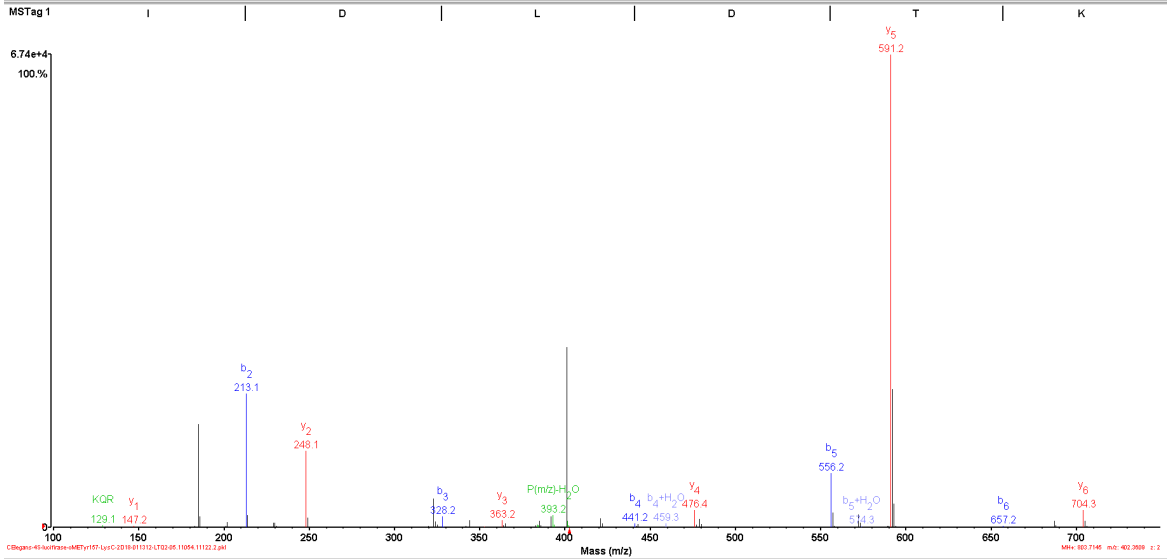

Peptide: (K)VIDLDTK(K); Score: 11.75;  
Spectral count: 1; Start aa position: 375.

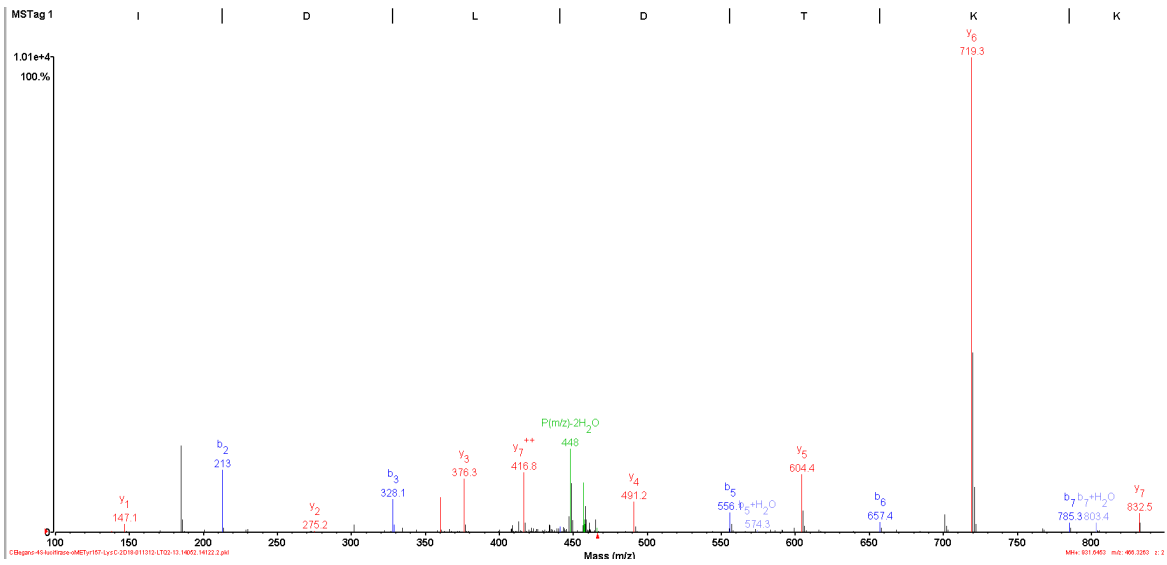

Peptide: (K)VIDLDTKK(S); Score: 16.38;  
Spectral count: 42; Start aa position: 375.

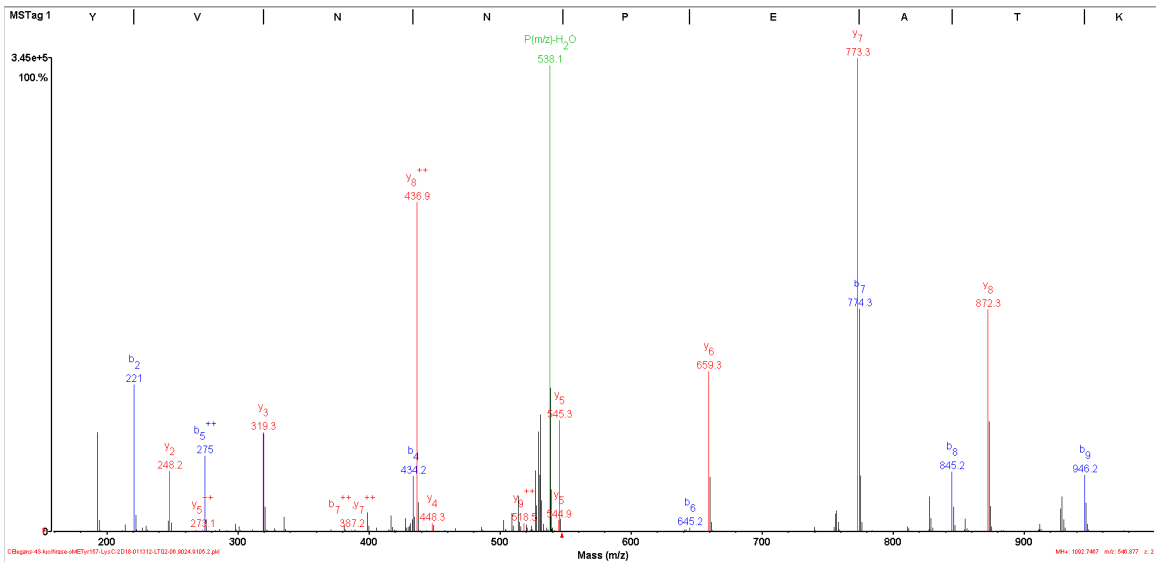

Peptide: (K)GYVNNPEATK(E); Score: 14.46;  
Spectral count: 3; Start aa position: 402.

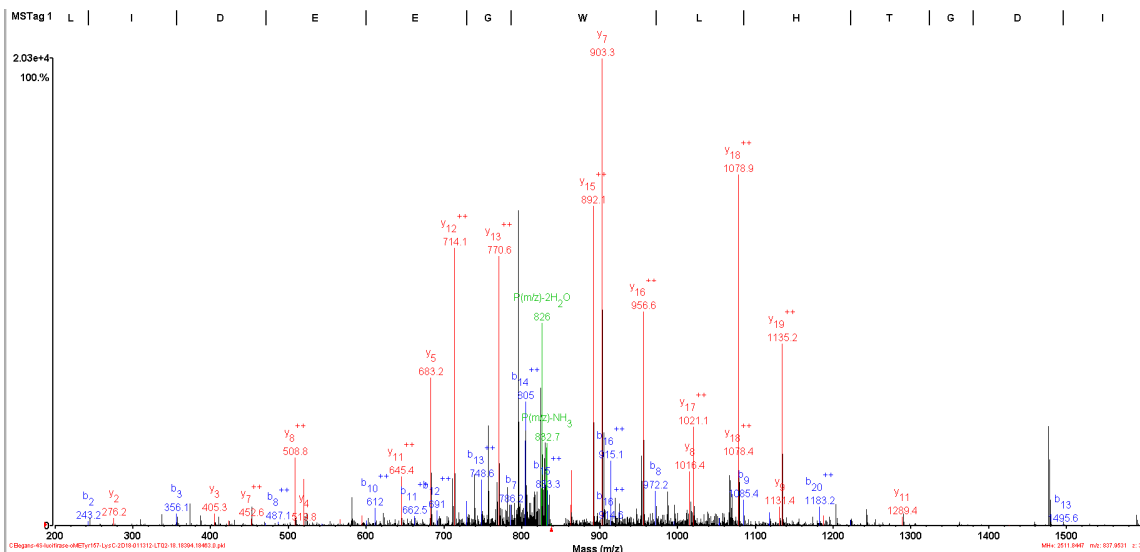

Peptide: (K)ELIDEEGLHTGDIGYYDEEK(H); Score: 21.24;  
Spectral count: 28; Start aa position: 412.

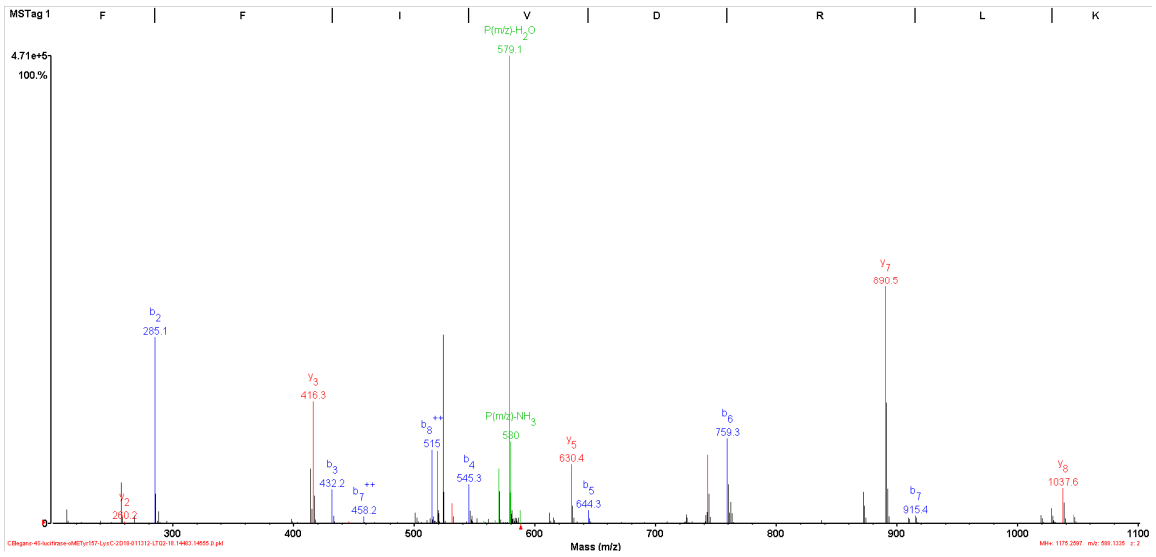

Peptide: (K)HFFIVDRLK(S); Score: 17.08;  
Spectral count: 2; Start aa position: 433.

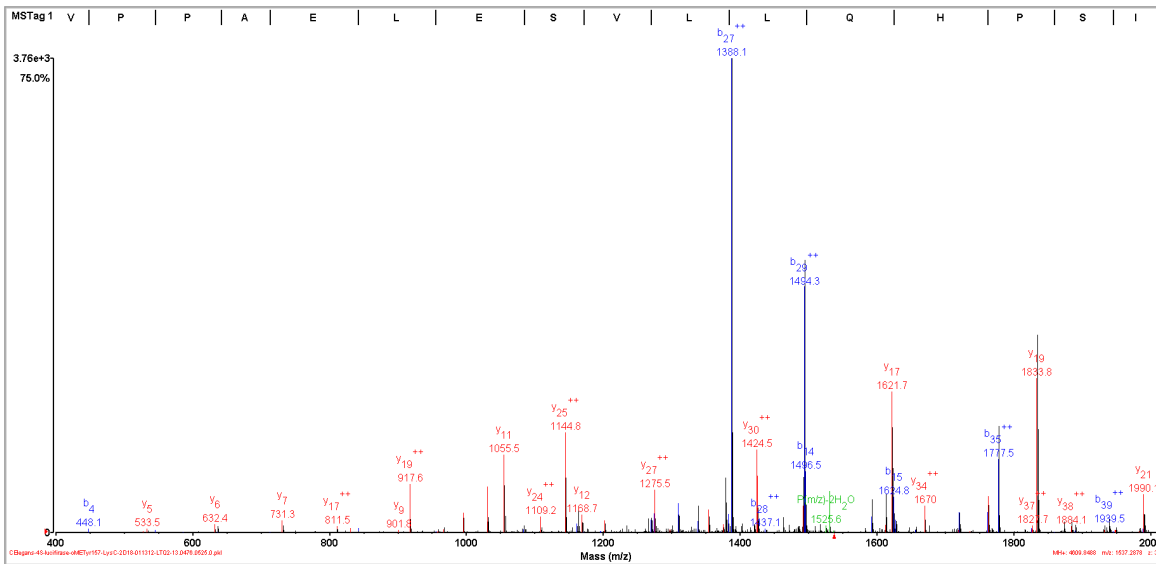

Peptide: (K)GYQVPPAELESVLLQHPISIFDAGVAGVDPDPVAGELPGAVVVLES GK(N);  
Score: 23.46; Spectral count: 9; Start aa position: 448.

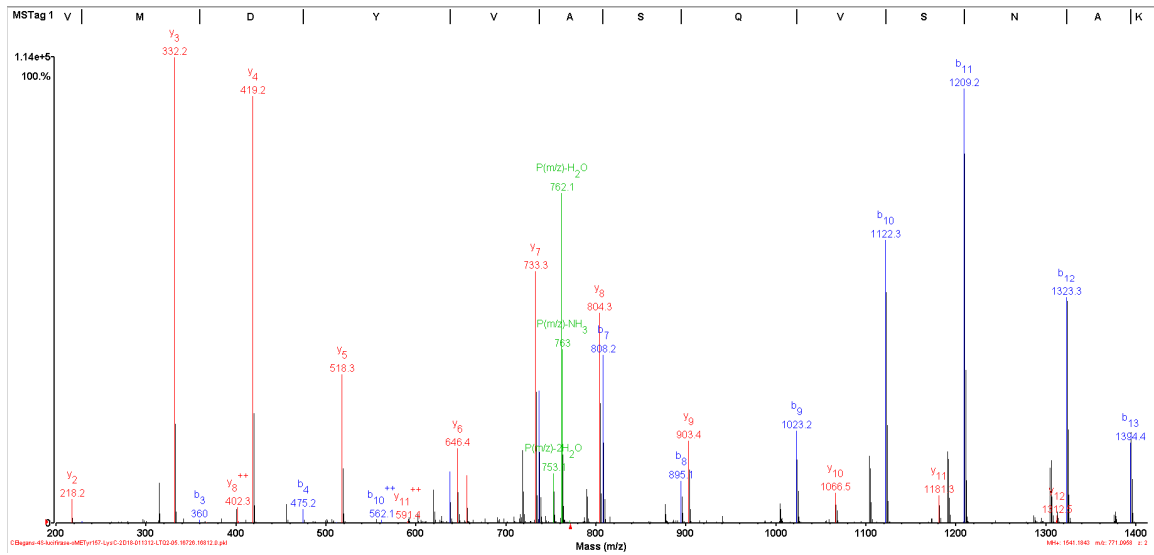

Peptide: (K)EVMDYVASQVSN(A)K; Score: 22.00;  
Spectral count: 6; Start aa position: 499.

**Figure S9. MS-MS spectra of peptides from JFFluc expressed in strain LWA717.**

The fragment-ion masses were unambiguously identified, confirming that the sequences of the peptides are from the *L. cruciata* luciferase. No peptide with any of the natural amino acids substituted by the Uaa OmeY was identified.

**Scheme S1. Synthesis of dipeptide Ala-DanAla (A, B) and DanAla-Ala (C).**

**A**

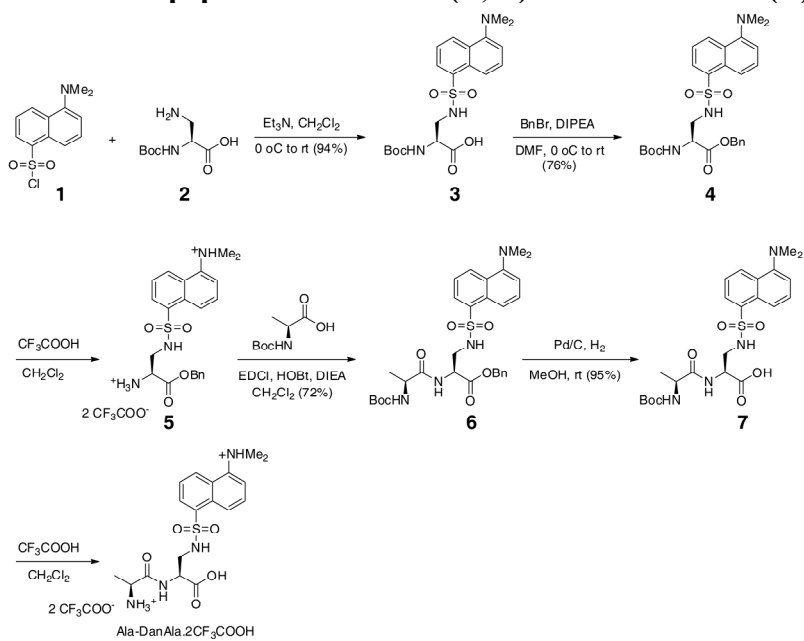

**B**

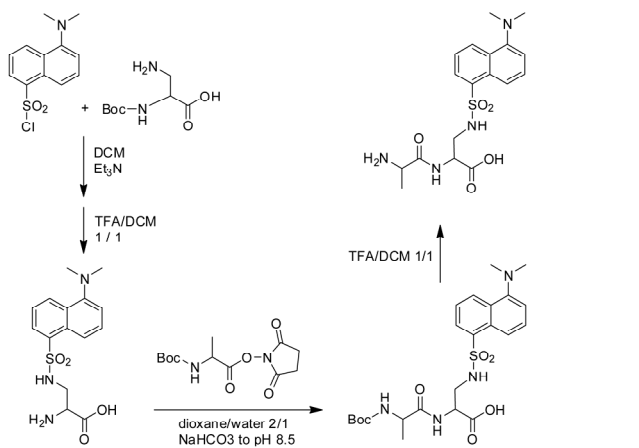

**C**

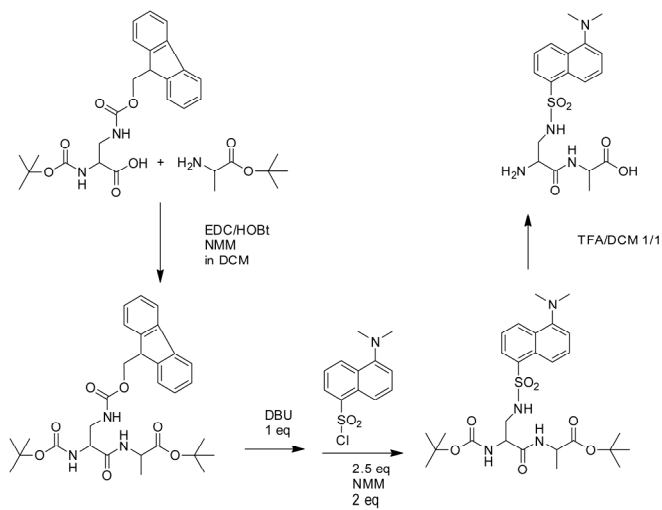



**H-Ala-DanAla-OH**

<sup>1</sup>H NMR (500 MHz, DMSO-*d*6):  $\delta$  = 8.63 (d,  $J$  = 8.0 Hz, 1H), 8.48 (d,  $J$  = 8.5 Hz, 1H), 8.28 (d,  $J$  = 9.0 Hz, 1H), 8.11-8.09 (m, 4H), 7.64 (dd,  $J$  = 7.0, 2.0 Hz, 1H), 7.60 (t,  $J$  = 8.0 Hz, 1H), 7.28 (d,  $J$  = 7.5 Hz, 1H), 4.40 (dt,  $J$  = 7.0, 5.5 Hz, 1H), 3.83 (t,  $J$  = 6.0 Hz, 1H), 3.14 (t,  $J$  = 5.5 Hz, 1H), 3.08 (dd,  $J$  = 13.5, 7.0 Hz, 1H), 2.84 (s, 6H), 1.35 (d,  $J$  = 7.0 Hz, 3H); <sup>13</sup>C NMR (125MHz, DMSO-*d*6):  $\delta$  = 170.7, 169.5, 151.3, 135.5, 129.6, 129.1, 129.0, 128.2, 128.0, 123.6, 119.1, 115.3, 64.9, 52.6, 48.1, 45.1, 43.2, 25.2, 16.9.

LC-MS (245 nm, single peak), ESI-ion trap, [M+H]<sup>+</sup><sub>expected</sub>: 409.15, [M+H]<sup>+</sup><sub>found</sub>: 408.5, [2M+H]<sup>+</sup><sub>found</sub>: 816.3

**H-DanAla-Ala-OH**

<sup>1</sup>H NMR (500 MHz, DMSO-*d*6):  $\delta$  = 8.49 (d,  $J$  = 8.5 Hz, 1 H), 8.28 (d,  $J$  = 8.5 Hz, 1H), 8.11 (d,  $J$  = 6.5 Hz, 1H), 7.64 (t,  $J$  = 8.0 Hz, 1H), 7.60 (t,  $J$  = 8.0 Hz, 1H), 7.27 (d,  $J$  = 7.0 Hz, 1H), 4.18 (t,  $J$  = 6.0 Hz, 1H), 3.66 (s, 1H), 3.07 (dd,  $J$  = 13.0, 4.0 Hz, 1H), 2.98 (dd,  $J$  = 13.0, 7.5 Hz, 1H), 2.83 (s, 6H), 1.26 (d,  $J$  = 7.0 Hz, 3H); <sup>13</sup>C NMR (125MHz, DMSO-*d*6):  $\delta$  = 173.8, 168.2, 151.4, 135.1, 129.7, 129.1, 129.0, 128.4, 128.1, 123.6, 118.9, 115.3,

64.9, 52.9, 47.8, 45.1, 44.6, 17.2. LC-MS (245 nm, single peak), ESI-ion trap, [M+H]<sup>+</sup><sub>expected</sub>: 409.15, [M+H]<sup>+</sup><sub>found</sub>: 408.5, [2M+H]<sup>+</sup><sub>found</sub>: 816.4

# <sup>1</sup>H NMR (500 MHz, DMSO-d<sub>6</sub>) of H-Ala-DanAla-OH

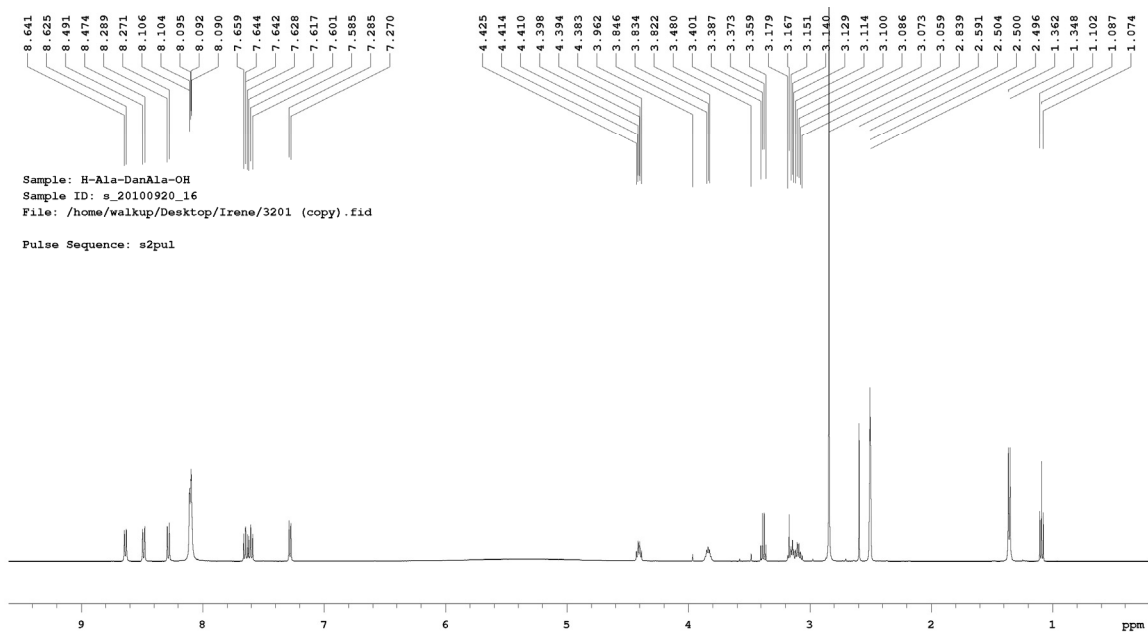

# <sup>13</sup>C NMR (125MHz, DMSO-d<sub>6</sub>) of H-Ala-DanAla-OH

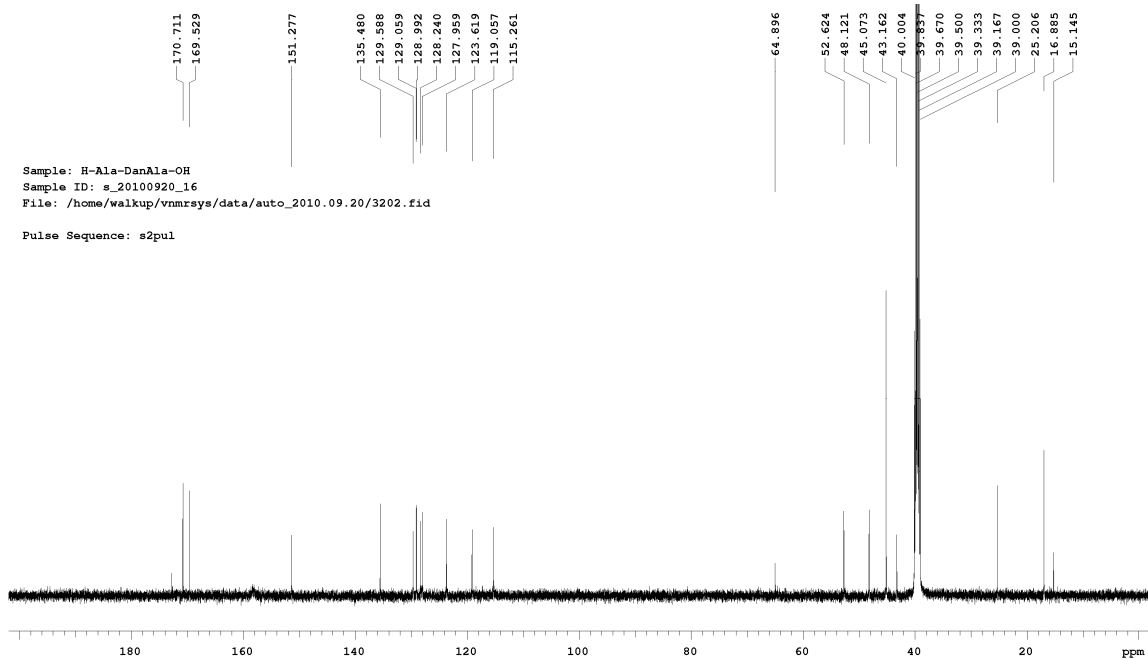

# <sup>1</sup>H NMR (500 MHz, DMSO-*d*<sub>6</sub>) of H-DanAla-Ala-OH

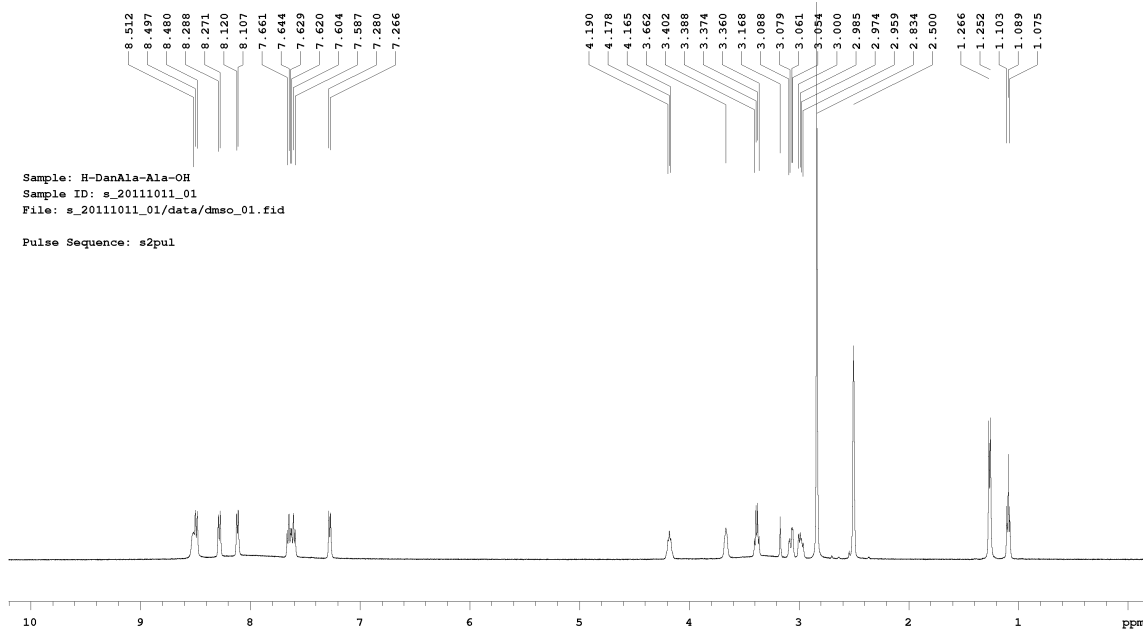

# <sup>13</sup>C NMR (125MHz, DMSO-*d*<sub>6</sub>) of H-DanAla-Ala-OH

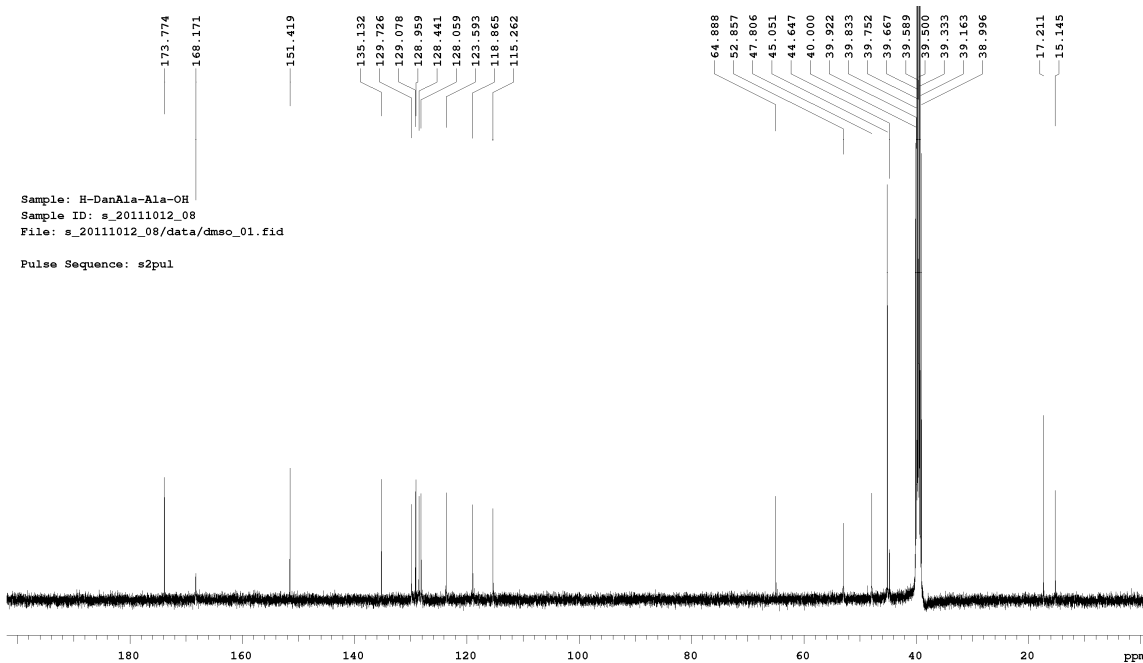

## Plasmid Sequences

*unc-54p::LeuRS*

ATGACCATGATTACGCCAAGCTTGTCTTCTTCTAAATTCCCATAAAAATCCCGA  
AACTCCTTCCCTCTATCTTCTTTTTCTTCTCGTTTTCAAATGTTTCTCTCTATCC  
CATTCTCTCATCAATTGAGTGGGATGAGGCTATCTCTGCCTCTCTTCTGAATCT  
CTGAACCATCTTACATTACACTGTGGATGACGAGCCCCACAGGCTCCCTTGCA  
TCAGATACTGCCATTGGGGATGGCAAAGAAGAGAGAAGGTATTGTGAGGAT  
ATATTTTTCTAAGAAAAACGTTTGAAGAAAAGAAGATGAAGAAGATCTGCT  
TGATTCATTGCACAAGTTAGAAGTAACAGGGGTCTATATTTTGAAGAAGTTA  
AAGGGAATGCAACTGAACATAAAATTAACAAAGGGATTGAATCCTGCAGT  
GAGTATTTTCGGTTTTTCACTGGTTCTCTGTAAAAAGAGTAATGCAAAGGGCA  
AGTTAACTTAGGTCGTAAATGTATTGAATTTGCTTAAAATCTGAAGATCTAGT  
GGTGAACCGTGGAAGATTATCAAGAGGAGGCTGAAGATCTGTTTAAAGAACCA  
TTAATCAAACCTGGTATTCTATTTTTCACTGGTTGTATGTAAACATTCTATCTTAT  
TCCTTTTATCACTGTTCTGCACCTTTCCTATAAAAAAAGTTGACCGACCGTACT  
CTCTGAATTCATTTTTCCCGATCTTACCAACTCCCGATCTATCTCTATCCCTGG  
TTTTTCTTCGTGCTCCAATGGAATTTCTGAGACTTCCACTATCTTCTCTGGCA  
CCCTCCACTACGCGTAGGCGTCTCTCGTTCGTGTATTCCCGGGAAGCCGGTT  
CCCGTCTCTCCCGCCGCTGCCGCTGCCGCACACAGCTTTACACCTCGTAGAAT  
CCCCAAAGAGGGGGCGTGGCTTGCGGGTGCCAACATCCTCCTGCCGAGGAAGA  
AGCAGGCACTCATCACTCGCATCATCAACCTCGGGATTGGCCAAAGGACCCA  
AAGGTATGTTTCGAATGATACTAACATAACATAGAACATTTTCAGGAGGACC  
CTTGGCTAGCGGTAGAAAAAATGCAAGAGCAATACCGCCCCGGAAGAGATAG  
AATCCAAAGTACAGCTTCATTGGGATGAGAAGCGCACATTTGAAGTAACCGA  
AGACGAGAGCAAAGAGAAGTATTACTGCCTGTCTATGCTTCCCTATCCTTCTG  
GTCGACTACACATGGGCCACGTACGTAACCTACACCATCGGTGACGTGATCGC  
CCGCTACCAGCGTATGCTGGGCAAAAACGTCCTGCAGCCGATCGGCTGGGAC  
GCGTTTGGTCTGCCTGCGGAAGGCGCGCGGTGAAAAACAACACCGCTCCGG  
CACCGTGGACGTACGACAACATCGCGTATATGAAAAACCAGCTCAAAATGCT  
GGGCTTTGGTTATGACTGGAGCCGCGAGCTGGCAACCTGTACGCCGGAATAC  
TACCGTTGGGAACAGAAATTCTTCACCGAGCTGTATAAAAAAGGCCTGGTAT  
ATAAGAAGACTTCTGCGGTCAACTGGTGCCCGAACGACCAGACCGTACTGGC  
GAACGAACAAGTTATCGACGGCTGCTGCTGGCGCTGCGATACCAAAGTTGAA  
CGTAAAGAGATCCCGCAGTGGTTTATCAAATCACTGCTTACGCTGACGAGC  
TGCTCAACGATCTGGATAAACTGGATCACTGGCCAGACACCGTTAAAACCAT  
GCAGCGTAACTGGATCGGTTCGTTCCGAAGGCGTGGAGATCACCTTCAACGTT  
AACGACTATGACAACACGCTGACCGTTTACACTACCCGCCCGGACACCTTTA  
TGGGTTGTACCTACCTGGCGGTAGCTGCGGGTCATCCGCTGGCGCAGAAAGC  
GGCGGAAAATAATCCTGAACTGGCGGCCTTTATTGACGAATGCCGTAACACC  
AAAGTTGCCGAAGCTGAAATGGCGACGATGGAGAAAAAAGGCGTCGATACT  
GGCTTTAAAGCGGTTCAACCATTAACGGGCGAAGAAATTCCCGTTTGGGCAG  
CAAACCTTCGTATTGATGGAGTACGGCACGGGCGCAGTTATGGCGGTACCGGG  
GCACGACCAGCGGACTACGAGTTTGCCTCTAAATACGGCCTGAACATCAAA  
CCGGTTATCCTGGCAGCTGACGGCTCTGAGCCAGATCTTCTCAGCAAGCCCT

GACTGAAAAAGGCGTGCTGTTCAACTCTGGCGAGTTCAACGGTCTTGACCAT  
GAAGCGGCCTTCAACGCCATCGCCGATAAACTGACTGCGATGGGCGTTGGCG  
AGCGTAAAGTGAACCTACCGCCTGCGCGACTGGGGTGTTCCTCGTCAGCGTTA  
CTGGGGCGCGCCGATTCCGATGGTGACGCTGGAAGACGGTACCGTAATGCCG  
ACCCCGGACGACCAGCTGCCGGTGATCCTGCCGGAAGATGTGGTAATGGACG  
GCATTACCAGCCCGATTAAAGCAGATCCGGAGTGGGCGAAAACCTACCGTTAA  
CGGTATGCCAGCACTGCGTGAAACCGACACTTTCGACACCTTTATGGAGTCCT  
CCTGGTACTATGCGCGCTACACTTGCCCGCAGTACAAAGAAGGTATGCTGGA  
TTCCGAAGCGGCTAACTACTGGCTGCCGGTGGATATCTACATTGGTGGTATTG  
AACACGCCATTATGCACCTGCTCTACTTCCGCTTCTTCCACAACTGATGCGT  
GATGCAGGCATGGTGAACCTGACGAACCAGCGAAACAGTTGCTGTGTCAGG  
GTATGGTGCTGGCAGATGCCTTCTACTATGTTGGCGAAAACGGCGAACGTAA  
CTGGGTTTCCCCGGTTGATGCTATCGTTGAACGTGACGAGAAAGGCCGTATC  
GTGAAAGCGAAAGATGCGGCAGGCCATGAACTGGTTTATACCGGCATGAGCA  
AAATGTCCAAGTCGAAGAACAACGGTATCGACCCGCAGGTGATGGTTGAACG  
TTACGGCGCGGACACCGTTCGTCTGTTTATGATGTTTGCTTCTCCGGCTGATA  
TGACTCTCGAATGGCAGGAATCCGGTGTGGAAGGGGCTAACCGCTTCCTGAA  
ACGTGTCTGGAACTGGTTTACGAGCACACAGCAAAAGGTGATGTTGCGGCA  
CTGAACGTTGATGCGCTGACTGAAAATCAGAAAGCGCTGCGTCGCGATGTGC  
ATAAAACGATCGCTAAAGTGACCGATGATATCGGCCGTCGTCAGACCTTCAA  
CACCGCAATTGCGGGCATTATGGAGCTGATGAACAACTGGCGAAAGCACCA  
ACCGATGGCGAGCAGGATCGCGCTCTGATGCAGGAAGCACTGCTGGCCGTTG  
TCCGTATGCTTAACCCGTTACCCCGCACATCTGCTTCACGCTGTGGCAGGAA  
CTGAAAGGCGAAGGCGATATCGACAACGCGCCGTGGCCGGTTGCTGACGAA  
AAAGCGATGGTGGAAAGACTCCACGCTGGTTCGTGGTGCAGGTTAACGGTAAAG  
TCCGTGCCAAAATCACCGTTCGGGTGGACGCAACGGAAGAACAGGTTCCGCGA  
ACGTGCTGGCCAGGAACATCTGGTAGCAAAATATCTTGATGGCGTTACTGTA  
CGTAAAGTGATTTACGTACCAGGTAACTCCTCAATCTGGTTCGTTGGCTAAGA  
GCTCCGCATCGGCCGCTGTCATCAGATCGCCATCTCGCGCCCGTGCCTCTGAC  
TTCTAAGTCCAATTACTCTTCAACATCCCTACATGCTCTTTCTCCCTGTGCTCC  
CACCCCTATTTTTGTTATTATCAAAAAAACTTCTTCTTAATTTCTTTGTTTTT  
AGCTTCTTTAAGTCACCTCTAACAAATGAAATTGTGTAGATTCAAAAATAGAA  
TTAATTCGTAATAAAAAGTCGAAAAAAATTGTGCTCCCTCCCCCATTAATAA  
TAATTCTATCCAAAATCTACACAATGTTCTGTGTACACTTCTTATGTTTTTTT  
TACTTCTGAATAAATTTTTTTTTGAAACATCATAGAAAAAACCGCACACAAAAT  
ACCTTATCATATGTTACGTTTCAGTTTATGACCGCAATTTTTATTTCTTCGCAC  
GTCTGGGCCTCTCATGACGTCAAATCATGCTCATCGTGAAAAAGTTTTGGAGT  
ATTTTTGGAATTTTTCAATCAAGTGAAAGTTTATGAAATTAATTTCTGCTTT  
TGCTTTTTGGGGGTTTCCCCTATTGTTTGTCAAGAGTTTCGAGGACGGCGTTTT  
TCTTGCTAAAATCACAAGTATTGATGAGCACGATGCAAGAAAGATCGGAAGA  
AGGTTTGGGTTTGGAGGCTCAGTGGAAGGTGAGTAGAAGTTGATAATTTGAAA  
GTGGAGTAGTGTCTATGGGGTTTTTGCCTTAAATGACAGAATACATTCCCAAT  
ATACCAAACATAACTGTTTAAAATTAACATTTTTCTAAATTTTATATGATTT  
CTTTTAAATTTGCAAAAATTAATTTGAATTTCCCGCGCAAATGAGTGAC  
TTCATTTTCTGCATTATTGTGTTTTCCGGCTATATTAATAGGTATTTGTTTGTG  
TTTTTCTTTATTTTATGATTCGAACTCCAATTTGTAATTTTCGAACATATTTT

CCTAAAGAAAAAATATGATTAATCTGGAAAAATTGGAAAATTATTTTTCAA  
TAAAAACAAAGAAAAAATGAAGAAAAACCTATTAGTTTGGCCATAAAC  
GCAAAAATGTCGAAAATGACGTCCTCATCTGCGCGGAAATCAAGAATAAT  
TCGGCCTTTTTATTTTTTTGGAAAATCGTAAAACATTTAGAAAAATTTTTAA  
TAGTTATAGTGGGACTGTATTCTGTCATTTAGGGCAAAGCCAGAGACGCTA  
CTCCACCGTTGGGGGATCTCCATGGGGCTCAGCCTCAACCAATTTTTAGTGTT  
AAAAATTTGATTTTTTCAGTTAAAAACGATGGTTTTTTGATGCTTTTTACCTATT  
TTACAGATAGAAAATTTTAAATTTTCGCAAAAATCTTTAAAAATAAACTTTTT  
GTTTGGTTTTTCGCTCGAAAATAGCTTTAAATTTGCAGTTTTTCTCTCAAAA  
CTAAATTTTCATGCGTTCCACGTGGCTTTCTATCAATTTAAATACTAATATTAAT  
ATTTTCTTCAAATCTGCCACGTTACAGCCTGCCATAGCCTTCTGAAACTCTA  
CAATCCCCTCTAATCACTAGCGCCGCTCCCCGCACACTCAACACAGCGAG  
CGGCGGAACCCGCGGGGTGTCGGCCGCTCGGACACGCTCCCGTATATAACGA  
CGCGGCGCGCGTGGATCCCCGCCGATGGTGGAATCGGTAGACACAAGGG  
ATTCTAAATCCCTCGGCGTTCGCGCTGTGCGGGTTCAAGTCCCGCTCCGGGTA  
TATCTTTTTGAATTTACAGCATTTTTCATACTAGTCGGCCGTACGGGCCCTTTC  
GTCTCGCGGTTTTCGGTGATGACGGTGAAAACCTCTGACACATGCAGCTCCC  
GGAGACGGTACAGCTTGTCTGTAAGCGGATGCCGGGAGCAGACAAGCCCGT  
CAGGGCGCGTCAGCGGGTGTGGCGGGTGTGCGGGCTGGCTTAACTATGCGG  
CATCAGAGCAGATTGTAAGAGTGCACCATATGCGGTGTGAAATACCGCA  
CAGATGCGTAAGGAGAAAATACCGCATCAGGCGGCCTTAAGGGCCTCGTGAT  
ACGCCTATTTTTATAGTTAATGTCATGATAATAATGGTTTCTTAGACGTCAG  
GTGGCACTTTTCGGGGAATGTGCGCGGAACCCCTATTTGTTATTTTTCTAA  
ATACATTCAAATATGTATCCGCTCATGAGACAATAACCCTGATAAATGCTTCA  
ATAATATTGAAAAAGGAAGAGTATGAGTATCAACATTTCCGTGTCGCCCTT  
ATCCCTTTTTTGCGGCATTTTGCCTTCCTGTTTTTGTCTACCCAGAAACGCTG  
GTGAAAGTAAAAGATGCTGAAGATCAGTTGGGTGCACGAGTGGGTACATCG  
AACTGGATCTCAACAGCGGTAAGATCCTTGAGAGTTTTTCGCCCCGAAGAACG  
TTTTCCAATGATGAGCACTTTTAAAGTTCTGCTATGTGGCGCGGTATTATCCC  
GTATTGACGCCGGGCAAGAGCAACTCGGTGCGCCGATACACTATTCTCAGAA  
TGACTTGGTTGAGTACTACCCAGTACAGAAAAGCATCTTACGGATGGCATG  
ACAGTAAGAGAATTATGCAGTGTGCCATAACCATGAGTGATAACACTGCGG  
CCAACCTACTTCTGACAACGATCGGAGGACCGAAGGAGCTAACCGCTTTTTT  
GCACAACATGGGGGATCATGTAACCTCGCCTTGATCGTTGGGAACCGGAGCTG  
AATGAAGCCATACCAAACGACGAGCGTGACACCACGATGCCTGTAGCAATG  
GCAACAACGTTGCGCAAACCTATTAACCTGGCGAACTACTTACTCTAGCTTCCCG  
GCAACAATTAATAGACTGGATGGAGGCGGATAAAGTTGCAGGACCACTTCTG  
CGCTCGGCCCTTCCGGCTGGCTGGTTTATTGCTGATAAATCTGGAGCCGGTGA  
GCGTGGGTCTCGCGGTATCATTGCAGCACTGGGGCCAGATGGTAAGCCCTCC  
CGTATCGTAGTTATCTACACGACGGGGAGTCAGGCAACTATGGATGAACGAA  
ATAGACAGATCGCTGAGATAGGTGCCTCACTGATTAAGCATTGGTAACTGTC  
AGACCAAGTTTACTCATATATACTTTAGATTGATTTAAAACTTCATTTTTAATT  
TAAAAGGATCTAGGTGAAGATCCTTTTTGATAATCTCATGACCAAATCCCTT  
AACGTGAGTTTTCGTTCCACTGAGCGTCAGACCCCGTAGAAAAGATCAAAGG  
ATCTTCTTGAGATCCTTTTTTCTGCGGTAATCTGCTGCTTGCAAACAAAA  
AACCACCGCTACCAGCGGTGGTTTGGTTGCCGGATCAAGAGCTACCAACTCTT

TTTCCGAAGGTAACCTGGCTTCAGCAGAGCGCAGATACCAAATACTGTCCTTCT  
AGTGTAGCCGTAGTTAGGCCACCCTCAAGAACTCTGTAGCACCGCCTACA  
TACCTCGCTCTGCTAATCCTGTTACCAGTGGCTGCTGCCAGTGGCGATAAGTC  
GTGTCTTACCGGGTTGGACTCAAGACGATAGTTACCGGATAAGGCGCAGCGG  
TCGGGCTGAACGGGGGGTTCGTGCACACAGCCCAGCTTGGAGCGAACGACCT  
ACACCGAACTGAGATACCTACAGCGTGAGCATTGAGAAAGCGCCACGCTTCC  
CGAAGGGAGAAAGGCGGACAGGTATCCGGTAAGCGGCAGGGTCGGAACAGG  
AGAGCGCACGAGGGAGCTTCCAGGGGGAAACGCCTGGTATCTTTATAGTCCT  
GTCGGGTTTCGCCACCTCTGACTTGAGCGTCGATTTTTGTGATGCTCGTCAGG  
GGGGCGGAGCCTATGGAAAACGCCAGCAACGCGGCCTTTTTACGGTTCCTG  
GCCTTTTGCTGGCCTTTTGCTCACATGTTCTTCTGCGTTATCCCCTGATTCT  
GTGGATAACCGTATTACCGCCTTTGAGTGAGCTGATACCGCTCGCCGCAGCC  
GAACGACCGAGCGCAGCGAGTCAGTGAGCGAGGAAGCGGAAGAGCGCCCAA  
TACGCAAACCGCCTCTCCCCGCGCGTTGGCCGATTCATTAATGCAGCTGGCAC  
GACAGGTTTCCCGACTGGAAAGCGGGCAGTGAGCGCAACGCAATTAATGTGA  
GTTAGCTCACTCATTAGGCACCCAGGCTTTACACTTTATGCTTCCGGCTCGT  
ATGTTGTGTGGAATTGTGAGCGGATAACAATTCACACAGGAAACAGCT

*unc-54p::TyrRS*

ATGACCATGATTACGCCAAGCTTGTCTTCTTCTAAATTCCCATAAAATCCCGA  
AACTCCTTCCCTCTATCTTCTTTTTCTTCTCGTTTTCAAATGTTTCTCTATCC  
CATTCTCTCATCAATTGAGTGGGATGAGGCTATCTCTGCCTCTCTTCTGAATCT  
CTGAACCATCTTACATTACACTGTGGATGACGAGCCCCACAGGCTCCCTTGCA  
TCAGATACTGCCATTGGGGATGGCAAAGAAGAGAGAAGGTATTGTGAGGAT  
ATATTTTTCTAAGAAAAACGTTTGAAGAAAAGAAGATGAAGAAGATCTGCT  
TGATTCATTGCACAAGTTAGAAGTAACAGGGGTCTATATTTCGAAGAACTTA  
AAGGGAATGCAACTGAACATAAAATTAACAAAGGGATTGAATCCTGCAGT  
GAGTATTTTTCGGTTTTTCACTGGTCTCTGTAAAAAGAGTAATGCAAAGGGCA  
AGTTAACTTAGGTCGTAAATGTATTGAATTTGCTTAAAATCTGAAGATCTAGT  
GGTGAACCGTGGAAGATTATCAAGAGGAGGCTGAAGATCTGTTAAGAACCA  
TTAATCAAACCTGGTATTCTATTTTCACTGGTTGTATGTAAACATTCTATCTTAT  
TCCTTTTATCACTGTTCTGCACTTTCCTATAAAAAAAGTTGACCGACCGTACT  
CTCTGAATTCATTTTTCCCGATCTTACCAACTCCCGATCTATCTATCCCTGG  
TTTTTTCTTCGTGCTCCAATGGAATTCTTGAGACTTCCACTATCTTCTCTGGCA  
CCCTCCACTACGCGTAGGCGTCTCTCGCTTCGTGTATTCCCGGGAAGCCGGTT  
CCCGTCTCTCCCGCCGCTGCCGCTGCCGCACACAGCTTTACACCTCGTAGAAT  
CCCCAAAGAGGGGCGTGGCTTGCGGGTGCCAACATCCTCCTGCCGAGGAAGA  
AGCAGGCACTCATCACTCGCATCATCAACCTCGGGATTGGCCAAAGGACCCA  
AAGGTATGTTTCGAATGATACTAACATAACATAGAACATTTTCAGGAGGACC  
CTTGGCTAGCGGTAGAAAAAATGGCAAGCAGTAACTTGATTAACAATTGCA  
AGAGCGGGGGCTGGTAGCCCAGGTGACGGACGAGGAAGCGTTAGCAGAGCG  
ACTGGCGCAAGGCCCGATCGCGCTCTATTGCGGCTTCGATCCTACCGCTGAC  
AGCTTGCATTTGGGGCATCTTGTTCCATTGTTATGCCTGAAACGCTTCCAGCA  
GGCGGGCCACAAGCCGGTTGCGCTGGTAGGCGGCGGACGGGTCTGATTGGC  
GACCCGAGCTTCAAAGCTGCCGAGCGTAAGCTGAACACCGAAGAACTGTTT

AGGAGTGGGTGGACAAAATCCGTAAGCAGGTTGCCCGTTCCTCGATTTCGA  
CTGTGGAGAAAACCTCTGCTATCGCGGCGAACAACCTATGACTGGTTCGGCAAT  
ATGAATGTGCTGACCTTCCTGCGGATATTGGCAAACACTTCTCCGTTAACCA  
GATGATCAACAAAGAAGCGGTTAAGCAGCGTCTCAACCGTGAAGATCAGGG  
GATTCGTTCACTGAGTTTTCTACAACCTGTTGCAGGGTTATGACTTCGCT  
GTCTGAACAAACAGTACGGTGTGGTGTGCAAATTGGTGGTTCGACCAGTG  
GGTAACATCACTTCTGGTATCGACCTGACCCGTCGTCTGCATCAGAATCAGG  
TGTTTGGCCTGACCGTTCGCTGATCACTAAAGCAGATGGCACCAAATTTGGT  
AAAACCTGAAGGCGGCGCAGTCTGGTTGGATCCGAAGAAAACAGCCCGTAC  
AAATTCTACCAGTTCTGGATCAACACTGCGAGAGCCGACGTTTACCGCTTCCT  
GAAGTTCTTACCTTTATGAGCATTGAAGAGATCAACGCCCTGGAAGAAGAA  
GATAAAAACAGCGGTAAGCACCGCGCGCCAGTATGTACTGGCGGAGCAG  
GTGACTCGTCTGGTTCACGGTGAAGAAGGTTTACAGGCGGCAAAACGTATTA  
CCGAATGCCTGTTACGCGGTTCTTTGAGTGCCTGAGTGAAGCGGACTTCGA  
ACAGCTGGCGCAGGACGGCGTACCGATGGTTGAGATGGAAAAGGGCGCAGA  
CCTGATGCAGGCACTGGTCTGATTCTGAACTGCAACCTTCCCGTGGTCAGGCA  
CGTAAAACCTATCGCCTCCAATGCCATCACCATTAACGGTGAAAAACAGTCCG  
ATCCTGAATACTTCTTTAAAGAAGAAGATCGTCTGTTTGGTCGTTTTACCTTA  
CTGCGTCGCGGTA AAAAGAATTACTGTCTGATTTGCTGGAAATAAGAGCTCC  
GCATCGGCCGCTGTCATCAGATCGCCATCTCGCGCCCGTGCCTCTGACTTCTA  
AGTCCAATTACTCTTCAACATCCCTACATGCTCTTCTCCCTGTGCTCCCACCC  
CCTATTTTTGTTATTATCAAAAAA ACTTCTTCTTAATTTCTTTGTTTTTTAGCTT  
CTTTAAGTCACCTCTAACAATGAAATTGTGTAGATTCAAAAATAGAATTAAT  
TCGTAATAAAAAGTCGAAAAAAATTGTGCTCCCTCCCCCATTAATAATAATT  
CTATCCCAAATCTACACAATGTTCTGTGTACTTCTTATGTTTTTTTTACTT  
CTGAATAAATTTTTTTTGAACATCATAGAAAAAACCGCACACAAAATACCT  
TATCATATGTTACGTTTCAGTTTATGACCGCAATTTTTATTTCTTCGCACGTCT  
GGGCCTCTCATGACGTCAAATCATGCTCATCGTGAAAAAGTTTTGGAGTATTT  
TTGGAATTTTTCAATCAAGTGAAAGTTTATGAAATTAATTTTCTGCTTTTGT  
TTTTGGGGGTTTCCCCTATTGTTTGTCAAGAGTTTCGAGGACGGCGTTTTTCTT  
GCTAAAATCACAAGTATTGATGAGCACGATGCAAGAAAGATCGGAAGAAGG  
TTTGGGTTTGGAGGCTCAGTGGAAGGTGAGTAGAAGTTGATAATTTGAAAGTG  
GAGTAGTGTCTATGGGGTTTTTGCCTTAAATGACAGAATACATTCCCAATATA  
CCAAACATAACTGTTTAAAATTAACATTTTTCTAAATTTTATATGATTTCTTT  
TAAATTTGCAAAAATTA ACTTAAATTTGAATTTCCCGCGCAAATGAGTGACTTCA  
TTTTCTGCATTATTGTGTTTTCCGGCTATATTAATAGGTATTTGTTTGTGTTTTT  
CTTTATTTTATGATTCGAACTCCAATTTGTAAATTTTCGAACATATTTCCCTAA  
AGAAAAAATATGATTAATCTGGAAAAATTGGAAAATTAATTTTTCAAATAAAA  
AACAAAGAAAAAAATGAAGAAAAACCTATTAGTTTGGCCATAAAACGCAAA  
AATGTCGAAAATGACGTCACTCATCTGCGCGGGAAATCAAGAATAATTCCGC  
CTTTTTTATTTTTTTGGAAAATCGTAAAACATTTAGAAAAATTTTTTAATAGTT  
ATAGTGGGACTGTATTCTGTCAATTTAGGGCAAAAGCCAGAGACGCTACTCCA  
CCGTTGGGGGATCTCCATGGGGCTCAGCCTCAACCAATTTTTAGTGTTAAAAA  
TTTGATTTTTTTCAGTTAAAACGATGGTTTTTGTGCTTTTTTACCTATTTTACA  
GATAGAAAATTTTAAATTTTCGAAAAATCTTTAAAAATAAACTTTTTTGTGTTG  
GTTTTCGCTCGAAAATAGCTTTAAATTTGCAGTTTTTCTCTCAAAAACCTCTAA



ATTTTCATGCGTTCCACGTGGCTTTCTATCAATTTAAATACTAATATTAATATTT  
TCTTCAAATCTGCCACGTTACAGCCTGCCATAGCCTTCTGAAACTCTACAAT  
TCCCCTCTAATCACTAGCGCCGCTCCCCGCACACTCAACACAGCGAGCGGC  
GGAACCCGCGGGGTGTTCGGCCGCTCGGACACGCTCCCGTATATAACGACGCG  
GCGCGCGTGGATCCCCGGTGGGGTTCGAGCGGCCAAAGGGAGCAGACTCT  
AAATCTGCCGTCATCGACTTCGAAGGTTCGAATCCTTCCCCCACCATATCTTT  
TTGAATTTACAGCATTTCATACTAGTCGGCCGTACGGGCCCTTTTCGTCTCG  
CGCGTTTCGGTGATGACGGTGAACCTCTGACACATGCAGCTCCCGGAGAC  
GGTCACAGCTTGTCTGTAAGCGGATGCCGGGAGCAGACAAGCCCGTCAGGGC  
GCGTCAGCGGGTGTGGCGGGTGTTCGGGGCTGGCTTAACTATGCGGCATCAG  
AGCAGATTGTACTGAGAGTGCACCATATGCGGTGTGAAATACCGCACAGATG  
CGTAAGGAGAAAATACCGCATCAGGCGGCCCTAAGGGCCTCGTGATACGCCT  
ATTTTTATAGGTTAATGTCATGATAATAATGGTTTCTTAGACGTCAGGTGGCA  
CTTTTCGGGGAAATGTGCGCGGAACCCCTATTTGTTTATTTTTCTAAATACATT  
CAAATATGTATCCGCTCATGAGACAATAACCCTGATAAATGCTTCAATAATAT  
TGAAAAAGGAAGAGTATGAGTATTCAACATTTCCGTGTCGCCCTTATTCCCTT  
TTTTGCGGCATTTTGCCTTCTGTTTTTGTCTACCCAGAAACGCTGGTGAAAG  
TAAAAGATGCTGAAGATCAGTTGGGTGCACGAGTGGGTACATCGAACTGGA  
TCTCAACAGCGGTAAGATCCTTGAGAGTTTTCGCCCCGAAGAACGTTTTCCAA  
TGATGAGCACTTTTAAAGTTCTGCTATGTGGCGCGGTATTATCCCGTATTGAC  
GCCGGGCAAGAGCAACTCGGTTCGCCCATACACTATTCTCAGAATGACTTGG  
TTGAGTACTCACCAGTCACAGAAAAGCATCTTACGGATGGCATGACAGTAAG  
AGAATTATGCAGTGCTGCCATAACCATGAGTGATAAACAAGTGCAGGCAACTTA  
CTTCTGACAACGATCGGAGGACCGAAGGAGCTAACCCTTTTTTGCACAACA  
TGGGGGATCATGTAACCTCGCCTTGATCGTTGGGAACCGGAGCTGAATGAAGC  
CATACCAAACGACGAGCGTGACACCACGATGCCTGTAGCAATGGCAACAAC  
GTTGCGCAAACCTATTAAGTGGCGAACTACTTACTCTAGCTTCCCGGCAACAAT  
TAATAGACTGGATGGAGGCGGATAAAGTTGCAGGACCACTTCTGCGCTCGGC  
CCTTCCGGCTGGCTGGTTTATTGCTGATAAATCTGGAGCCGGTGAGCGTGGGT  
CTCGCGGTATCATTGCAGCACTGGGGCCAGATGGTAAGCCCTCCCGTATCGT  
AGTTATCTACACGACGGGGAGTCAGGCAACTATGGATGAACGAAATAGACA  
GATCGCTGAGATAGGTGCCTCACTGATTAAGCATTGGTAACTGTCAGACCAA  
GTTTACTCATATATACTTTAGATTGATTTAAAACCTCATTTTTTAATTTAAAAGG  
ATCTAGGTGAAGATCCTTTTTGATAATCTCATGACCAAAAATCCCTTAACGTGA  
GTTTTCGTTCCACTGAGCGTCAGACCCCGTAGAAAAGATCAAAGGATCTTCTT  
GAGATCCTTTTTTTCTGCGGTAATCTGCTGCTTGCAAACAAAAAAACCACCG  
CTACCAGCGGTGGTTTGTTCGCCGATCAAGAGCTACCAACTCTTTTTCCGAA  
GGTAACTGGCTTACGACAGAGCGCAGATACCAAATACTGTCCTTCTAGTGTAG  
CCGTAGTTAGGCCACCACTTCAAGAACTCTGTAGCACCGCCTACATACCTCGC  
TCTGCTAATCCTGTTACCAGTGGCTGCTGCCAGTGGCGATAAGTCGTGTCTTA  
CCGGGTGGACTCAAGACGATAGTTACCGGATAAGGCGCAGCGGTTCGGGCTG  
AACGGGGGGTTCGTGCACACAGCCCAGCTTGGAGCGAACGACCTACACCGA  
ACTGAGATACCTACAGCGTGAGCATTGAGAAAGCGCCACGCTTCCCGAAGGG  
AGAAAGGCGGACAGGTATCCGGTAAGCGGCAGGGTCGGAACAGGAGAGCGC  
ACGAGGGAGCTTCCAGGGGGAAACGCCTGGTATCTTTATAGTCCTGTTCGGGT  
TTCGCCACCTCTGACTTGAGCGTCGATTTTTGTGATGCTCGTCAGGGGGGCGG

AGCCTATGGAAAAACGCCAGCAACGCGGCCTTTTTACGGTTCCTGGCCTTTTG  
CTGGCCTTTTGCTCACATGTTCTTTCCTGCGTTATCCCCTGATTCTGTGGATAA  
CCGTATTACCGCCTTTGAGTGAGCTGATACCGCTCGCCGCAGCCGAACGACC  
GAGCGCAGCGAGTCAGTGAGCGAGGAAGCGGAAGAGCGCCCAATACGCAAA  
CCGCCTCTCCCCGCGCGTGGGCCGATTCAATTAATGCAGCTGGCACGACAGGT  
TCCCGACTGGAAAGCGGGCAGTGAGCGCAACGCAATTAATGTGAGTTAGCTC  
ACTCATTAGGCACCCCAGGCTTTACACTTTATGCTTCCGGCTCGTATGTTGTG  
TGGAATTGTGAGCGGATAACAATTTACACACAGGAAACAGCT

*unc-54p::OmeRS*

ATGACCATGATTACGCCAAGCTTGTCTTCTTCTAAATTCCCATAAAATCCCGA  
AACTCCTTCCCTCTATCTTCTTTTTCTTCTCGTTTTCAAATGTTTCTCTCTATCC  
CATTCTCTCATCAATTGAGTGGGATGAGGCTATCTCTGCCTCTCTTCTGAATCT  
CTGAACCATCTTACATTACACTGTGGATGACGAGCCCCACAGGCTCCCTTGCA  
TCAGATACTGCCATTGGGGATGGCAAAGAAGAGAGAAGGTATTGTGAGGAT  
ATATTTTTCTAAGAAAAACGTTTGAAGAAAAGAAGATGAAGAAGATCTGCT  
TGATTCATTGCACAAGTTAGAAGTAACAGGGGTCTATATTTCGAAGAACTTA  
AAGGGAATGCAACTGAACATAAAATTAACAAAGGGATTGAATCCTGCAGT  
GAGTATTTTCGGTTTTTCACTGGTCTCTGTAAAAAGAGTAATGCAAAGGGCA  
AGTTAACTTAGGTCGTAAATGTATTGAATTTGCTTAAAATCTGAAGATCTAGT  
GGTGAACCGTGGAAGATTATCAAGAGGAGGCTGAAGATCTGTTAAGAACCA  
TTAATCAAACCTGGTATTCTATTTTCACTGGTTGTATGTAAACATTCTATCTTAT  
TCCTTTTATCACTGTTCTGCACTTTCCTATAAAAAAAGTTGACCGACCGTACT  
CTCTGAATTCATTTTTCCCGATCTTACCAACTCCCGATCTATCTCTATCCCTGG  
TTTTTTCTTCGTGCTCCAATGGAATTCTTGAGACTTCCACTATCTTCTCTGGCA  
CCCTCCACTACGCGTAGGCGTCTCTCGCTTCGTGTATTCCCGGGAAGCCGGTT  
CCCGTCTCTCCCGCCGCTGCCGCTGCCGCACACAGCTTTACACCTCGTAGAAT  
CCCCAAAGAGGGGCGTGGCTTGCGGGTGCCAACATCCTCCTGCCGAGGAAGA  
AGCAGGCACTCATCACTCGCATCATCAACCTCGGGATTGGCCAAAGGACCCA  
AAGGTATGTTTCGAATGATACTAACATAACATAGAACATTTTCAGGAGGACC  
CTTGGCTAGCGGTAGAAAAAATGGCAAGCAGTAACTTGATTAACAATTGCA  
AGAGCGGGGGCTGGTAGCCCAGGTGACGGACGAGGAAGCGTTAGCAGAGCG  
ACTGGCGCAAGGCCCGATCGCGCTCACCTGCGGCTTCGATCCTACCGCTGAC  
AGCTTGCATTTGGGGCATCTTGTTCCATTGTTATGCCTGAAACGCTTCCAGCA  
GGCGGGCCACAAGCCGTTGCGCTGGTAGGCGGCGCGACGGGTCTGATTGGC  
GACCCGAGCTTCAAAGCTGCCGAGCGTAAGCTGAACACCGAAGAACTGTTC  
AGGAGTGGGTGGACAAAATCCGTAAGCAGGTTGCCCGTTCCTCGATTTCGA  
CTGTGGAGAAAACCTCTGCTATCGCGGCGAACAACCTATGACTGGTTCGGCAAT  
ATGAATGTGCTGACCTTCTGCGGATATTGGCAAACACTTCTCCGTTAACCA  
GATGATCAACAAAGAAGCGGTTAAGCAGCGTCTCAACCGTGAAGATCAGGG  
GATTCGTTCACTGAGTTTTCTACAACCTGTTGCAGGGTTATACCATGGCCT  
GTCTGAACAAACAGTACGGTGTGGTGCTGCAAATTGGTGGTTCTGACCAGTG  
GGGTAACATCACTTCTGGTATCGACCTGACCCGTCGTCTGCATCAGAATCAGG  
TGTTTGGCCTGACCGTTCGCTGATCACTAAAGCAGATGGCACCAAATTTGGT

AAA ACTGAAGGCGGCGCAGTCTGGTTGGATCCGAAGAAAACCAGCCC GTAC  
AAATTCTACCAGTTCTGGATCAACACTGCGAGAGCCGACGTTTACCGCTT CCT  
GAAGTTCTTACCTTTATGAGCATTGAAGAGATCAACGCCCTGGAAGAAGAA  
GATAAAAACAGCGGTAAAGCACCGCGCGCCAGTATG TACTGGCGGAGCAG  
GTGACTCGTCTGGTTCACGGTGAAGAAGGTTTACAGGCGGCAAAACGTATTA  
CCGAATGCCTGTT CAGCGGTTCTTTGAGTGCCTGAGTGAAGCGGACTTCGA  
ACAGCTGGCGCAGGACGGCGTACCGATGGTTGAGATGGAAAAGGGCGCAGA  
CCTGATGCAGGCACTGGTCGATTCTGAACTGCAACCTTCCC GTGGTCAGGCA  
CGTAAACTATCGCCTCCAATGCCATCACCATTAACGGTGAAAAACAGTCCG  
ATCCTGAATACTTCTTTAAAGAAGAAGATCGTCTGTTTGGTCGTTTTACCTTA  
CTGCGTCGCGGTAAAAAGAATTA CTGTCTGATTTGCTGGAAATAAGAGCTCC  
GCATCGGCCGCTGTCATCAGATCGCCATCTCGCGCCCGTGCCTCTGACTTCTA  
AGTCCAATTA CTCTTCAACATCCCTACATGCTCTTTCTCCCTGTGCTCCCACCC  
CCTATTTTTGTTATTATCAAAAAA ACTTCTTCTTAATTTCTTTGTTTTTTAGCTT  
CTTTAAGTCACCTCTAACAATGAAATTGTGTAGATTCAAAAATAGAATTAAT  
TCGTAATAAAAAGTCGAAAAAAATTGTGCTCCCTCCCCCATTAAATAATAATT  
CTATCCCAAAATCTACACAATGTTCTGTGTACACTTCTTATGTTTTTTTTACTT  
CTGAATAAATTTTTTTTGAACATCATAGAAAAAACCGCACACAAAATACCT  
TATCATATGTTACGTTTCAGTTTATGACCGCAATTTTTATTCTTCGCACGTCT  
GGGCCTCTCATGACGTCAAATCATGCTCATCGTGAAAAAGTTTTGGAGTATTT  
TTGGAATTTTTCAATCAAGTGAAAGTTTATGAAATTAATTTTCCTGCTTTTGCT  
TTTTGGGGGTTTCCCCTATTGTTTGTCAAGAGTTTCGAGGACGGCGTTTTTCTT  
GCTAAAATCACAAGTATTGATGAGCACGATGCAAGAAAGATCGGAAGAAGG  
TTTGGGTTTGAGGCTCAGTGGAAGGTGAGTAGAAGTTGATAATTTGAAAGTG  
GAGTAGTGCTATGGGGTTTTTGCCTTAAATGACAGAATACATTCCCAATATA  
CCAAACATAACTGTTTAAAATTAACATTTTTCTAAATTTTATATGATTTCTTT  
TAAATTTGCAAAAATTACTTAAATTTGAATTCCC GCGCAAATGAGTGACTTCA  
TTTTCTGCATTATTGTGTTTTCCGGCTATATTAATAGGTATTTGTTTGTGTTTTT  
CTTTATTTTATGATTCGAACTCCAATTTGTAAATTTTCGAACATATTTCCCTAA  
AGAAAAAATATGATTAATCTGGAAAAATTGGAAAATTATTTTTCAAATAAAA  
AACAAAGAAAAAAATGAAGAAAAACCTATTAGTTTGGCCATAAAACGCAAA  
AATGTCGAAAATGACGTC ACTCATCTGCGCGGGAAATCAAGAATAATTGCGC  
CTTTTTTATTTTTTTGGAAAATCGTAAAACATTTAGAAAAATTTTTTAATAGTT  
ATAGTGGGACTGTATTCTGTCAATTTAGGGCAAAAGCCAGAGACGCTACTCCA  
CCGTTGGGGGATCTCCATGGGGCTCAGCCTCAACCAATTTTTAGTGTTAAAAA  
TTTGATTTTTTTCAGTTAAAAACGATGGTTTTTTGATGCTTTTTTACCTATTTTACA  
GATAGAAAATTTTTAAATTTTCGAAAAATCTTTAAAAATAAACTTTTTTGTTG  
GTTTTCGCTCGAAAATAGCTTTAAATTTGCAGTTTTTCTCTCAAAA ACTCTAA  
ATTTCATGCGTCCACGTGGCTTTCTATCAATTTAAATACTAATATTAATATTT  
TCTTCAAAATCTGCCACGTTACAGCCTGCCATAGCCTTCTGAAACTCTACAAT  
TCCCCTCTAATCACTAGCGCCGCTCCCCGCACACTCAACACAGCGAGCGGC  
GGAACCCGCGGGGTGTCGGCCGCTCGGACACGCTCCCGTATATAACGACGCG  
GCGCGCGTGGATCCCCGGTGGGGTTCCCGAGCGGCCAAAGGGAGCAGACTCT  
AAATCTGCCGTCATCGACTTCGAAGGTTCGAATCCTTCCCCCACCATATCTTT  
TTGAATTTACAGCATTTTTTCACTAGTCGGCCGTACGGGCCCTTTCGTCTCG  
CGGTTTTCGGTGATGACGGTGAAAACCTCTGACACATGCAGCTCCCGGAGAC

GGTCACAGCTTGTCTGTAAGCGGATGCCGGGAGCAGACAAGCCCGTCAGGGC  
GCGTCAGCGGGTGTGGCGGGTGTGGGGCTGGCTTAACTATGCGGCATCAG  
AGCAGATTGTAAGTGCACCATATGCGGTGTGAAATACCGCACAGATG  
CGTAAGGAGAAAATACCGCATCAGGCGGCCTTAAGGGCCTCGTGATACGCCT  
ATTTTTATAGTTAATGTCATGATAATAATGGTTTCTTAGACGTCAGGTGGCA  
CTTTTCGGGGAAATGTGCGCGGAACCCCTATTTGTTTATTTTTCTAAATACATT  
CAAATATGTATCCGCTCATGAGACAATAACCCCTGATAAATGCTTCAATAATAT  
TGAAAAAGGAAGAGTATGAGTATTCAACATTTCCGTGTGCCCTTATTCCCTT  
TTTTGCGGCATTTTGCCTTCCTGTTTTTGTCTACCCAGAAACGCTGGTGAAAG  
TAAAAGATGCTGAAGATCAGTTGGGTGCACGAGTGGGTACATCGAACTGGA  
TCTCAACAGCGGTAAGATCCTTGAGAGTTTTCGCCCCGAAGAACGTTTTCAA  
TGATGAGCACTTTTAAAGTTCTGCTATGTGGCGCGGTATTATCCCGTATTGAC  
GCCGGGCAAGAGCAACTCGGTGCGCCGATACACTATTCTCAGAATGACTTGG  
TTGAGTACTCACCAGTCACAGAAAAGCATCTTACGGATGGCATGACAGTAAG  
AGAATTATGCAGTGCTGCCATAACCATGAGTGATAAACTGCGGCCAACTTA  
CTTCTGACAACGATCGGAGGACCGAAGGAGCTAACCGCTTTTTTGCACAACA  
TGGGGGATCATGTAACCTGCCTTGATCGTTGGGAACCGGAGCTGAATGAAGC  
CATACCAAACGACGAGCGTGACACCACGATGCCTGTAGCAATGGCAACAAC  
GTTGCGCAAACCTATTAACCTGGCGAACTACTTACTCTAGCTTCCCGGCAACAAT  
TAATAGACTGGATGGAGGCGGATAAAGTTGCAGGACCACTTCTGCGCTCGGC  
CCTTCCGGCTGGCTGGTTTATTGCTGATAAATCTGGAGCCGGTGAGCGTGGGT  
CTCGCGGTATCATTGCAGCACTGGGGCCAGATGGTAAGCCCTCCCGTATCGT  
AGTTATCTACACGACGGGGAGTCAGGCAACTATGGATGAACGAAATAGACA  
GATCGCTGAGATAGGTGCCTCACTGATTAAGCATTGGTAACCTGTCAGACCAA  
GTTTACTCATATACTTTAGATTGATTTAAACTTCATTTTTAATTTAAAGG  
ATCTAGGTGAAGATCCTTTTTGATAATCTCATGACCAAATCCCTAACGTGA  
GTTTTCGTTCCACTGAGCGTCAGACCCCGTAGAAAAGATCAAAGGATCTTCTT  
GAGATCCTTTTTTTCTGCGGTAATCTGCTGCTTGCAAACAAAAAACACCG  
CTACCAGCGGTGGTTTGTGGCCGATCAAGAGCTACCAACTCTTTTTCCGAA  
GGTAACTGGCTTCAGCAGAGCGCAGATACCAAATACTGTCCTTCTAGTGTAG  
CCGTAGTTAGGCCACCACTTCAAGAACTCTGTAGCACCGCCTACATACCTCGC  
TCTGCTAATCCTGTTACCAGTGGCTGCTGCCAGTGGCGATAAGTCGTGTCTTA  
CCGGTTGGACTCAAGACGATAGTTACCGGATAAGGCGCAGCGGTGCGGGCTG  
AACGGGGGGTTCGTGCACACAGCCAGCTTGGAGCGAACGACCTACACCGA  
ACTGAGATACCTACAGCGTGAGCATTGAGAAAGCGCCACGCTTCCCGAAGGG  
AGAAAGGCGGACAGGTATCCGGTAAGCGGCAGGGTCGGAACAGGAGAGCGC  
ACGAGGGAGCTTCCAGGGGGAAACGCCTGGTATCTTTATAGTCCTGTGGGT  
TTCGCCACCTCTGACTTGAGCGTCGATTTTTGTGATGCTCGTCAGGGGGGCGG  
AGCCTATGGAAAAACGCCAGCAACGCGGCCTTTTTACGGTTCCCTGGCCTTTG  
CTGGCCTTTTGTCTACATGTTCTTCTGCGTTATCCCCTGATTCTGTGGATAA  
CCGTATTACCGCCTTTGAGTGAGCTGATACCGCTCGCCGACCGAACGACC  
GAGCGCAGCGAGTCAGTGAGCGAGGAAGCGGAAGAGCGCCCAATACGCAA  
CCGCCTCTCCCCGCGCGTTGGCCGATTCATTAATGCAGCTGGCACGACAGGT  
TCCCGACTGGAAAGCGGGCAGTGAGCGCAACGCAATTAATGTGAGTTAGCTC  
ACTCATTAGGCACCCAGGCTTTACACTTTATGCTTCCGGCTCGTATGTTGTG  
TGGAATTGTGAGCGGATAACAATTTACACAGGAAACAGCT

*unc-54p::DanRS*

ATGACCATGATTACGCCAAGCTTGTCTTCTTCTAAATTCCCATAAAATCCCGA  
AACTCCTTCCCTCTATCTTCTTTTTCTTCTCGTTTTCAAATGTTTCTCTCTATCC  
CATTCTCTCATCAATTGAGTGGGATGAGGCTATCTCTGCCTCTCTTCTGAATCT  
CTGAACCATCTTACATTACACTGTGGATGACGAGCCCCACAGGCTCCCTTGCA  
TCAGATACTGCCATTGGGGATGGCAAAGAAGAGAGAAGGTATTGTGAGGAT  
ATATTTTTCTAAGAAAAACGTTTGAAGAAAAGAAGATGAAGAAGATCTGCT  
TGATTCATTGCACAAGTTAGAAGTAACAGGGGTCTATATTTTCGAAGAACTTA  
AAGGGAATGCAACTGAACATAAAATTAACAAAGGGATTGAATCCTGCAGT  
GAGTATTTTCGGTTTTTCACTGGTTCTCTGTAAAAAGAGTAATGCAAAGGGCA  
AGTTAACTTAGGTCGTAAATGTATTGAATTTGCTTAAAATCTGAAGATCTAGT  
GGTGAACCGTGGAAGATTATCAAGAGGAGGCTGAAGATCTGTTAAGAACCA  
TTAATCAAACCTGGTATTCTATTTTCACTGGTTGTATGTAAACATTCTATCTTAT  
TCCTTTTATCACTGTTCTGCACTTTCCTATAAAAAAAGTTGACCGACCGTACT  
CTCTGAATTCATTTTTCCCGATCTTACCAACTCCCGATCTATCTCTATCCCTGG  
TTTTTTCTTCGTGCTCCAATGGAATTCTTGAGACTTCCACTATCTTCTCTGGCA  
CCCTCCACTACGCGTAGGCGTCTCTCGCTTCGTGTATTCCCGGGAAGCCGGTT  
CCCGTCTCTCCCGCCGCTGCCGCTGCCGCACACAGCTTTACACCTCGTAGAAT  
CCCCAAAGAGGGGCGTGGCTTGCGGGTGCCAACATCCTCCTGCCGAGGAAGA  
AGCAGGCACTCATCACTCGCATCATCAACCTCGGGATTGGCCAAAGGACCCA  
AAGGTATGTTTCGAATGATACTAACATAACATAGAACATTTTCAGGAGGACC  
CTTGGCTAGCGGTAGAAAAAATGGCAAGCAGTAACTTGATTAACAATTGCA  
AGAGCGGGGGCTGGTAGCCAGGTGACGGACGAGGAAGCGTTAGCAGAGCG  
ACTGGCGCAAGGCCCGATCGCGCTCACCTGCGGCTTCGATCCTACCGCTGAC  
AGCTTGCATTTGGGGCATCTTGTTCCATTGTTATGCCTGAAACGCTTCCAGCA  
GGCGGGCCACAAGCCGGTTGCGCTGGTAGGCGGCGCGACGGGTCTGATTGGC  
GACCCGAGCTTCAAAGCTGCCGAGCGTAAGCTGAACACCGAAGAACTGTTC  
AGGAGTGGGTGGACAAAATCCGTAAGCAGGTTGCCCGTTCCCTCGATTTCGA  
CTGTGGAGAAAACCTCTGCTATCGCGGCGAACAACTATGACTGGTTCGGCAAT  
ATGAATGTGCTGACCTTCTGCGCGATATTGGCAAACACTTCTCCGTTAACCA  
GATGATCAACAAAGAAGCGGTTAAGCAGCGTCTCAACCGTGAAGATCAGGG  
GATTCGTTCACTGAGTTTTCTACAACCTGTTGCAGGGTTATACCATGGCCT  
GTCTGAACAAACAGTACGGTGTGGTGTGCAAATTGGTGGTTCTGACCAGTG  
GGGTAACATCACTTCTGGTATCGACCTGACCCGTCGTCTGCATCAGAATCAGG  
TGTTCGGCCTGACCGTTCCGCTGATCACTAAAGCAGATGGCACCAAATTTGGT  
AAAACCTGAAGGCGGCGCAGTCTGGTTGGATCCGAAGAAAACCAGCCCGTAC  
AAATTCTACCAGTTCTGGATCAACACTGCGAGAGCCGACGTTTACCGCTTCT  
GAAGTTCTTACCTTTATGAGCATTGAAGAGATCAACGCCCTGGAAGAAGAA  
GATAAAAACAGCGGTAAAGCACCGCGCGCCAGTATGTAAGTGGCGGAGCAG  
GTGACTCGTCTGGTTCACGGTGAAGAAGGTTTACAGGCGGCAAAACGTATTA  
CCGAATGCCTGTTACGCGGTTCTTTGAGTGCCTGAGTGAAGCGGACTTCGA  
ACAGCTGGCGCAGGACGGCGTACCGATGGTTGAGATGGAAAAGGGCGCAGA  
CCTGATGCAGGCACTGGTCGATTCTGAACTGCAACCTTCCCGTGGTCAGGCA  
CGTAAAACCTATCGCCTCCAATGCCATCACCATTAACGGTGAAAAACAGTCCG  
ATCCTGAATACTTCTTTAAAGAAGAAGATCGTCTGTTTGGTCGTTTTACCTTA

CTGCGTCGCGGTAAAAAGAATTACTGTCTGATTTGCTGGAAATAAGAGCTCC  
GCATCGGCCGCTGTCATCAGATCGCCATCTCGCGCCCGTGCCTCTGACTTCTA  
AGTCCAATTACTCTTCAACATCCCTACATGCTCTTTCTCCCTGTGCTCCCACCC  
CCTATTTTTGTTATTATCAAAAAAATTTCTTCTTAATTTCTTTGTTTTTTAGCTT  
CTTTAAGTCACCTCTAACAATGAAATTGTGTAGATTCAAAAAATAGAATTAAT  
TCGTAATAAAAAGTCGAAAAAAATTGTGCTCCCTCCCCCATTAAATAATAATT  
CTATCCCAAATCTACACAATGTTCTGTGTACACTTCTTATGTTTTTTTTACTT  
CTGAATAAATTTTTTTTGAACATCATAGAAAAAACCGCACACAAAATACCT  
TATCATATGTTACGTTTCAGTTTATGACCGCAATTTTTATTCTTCGCACGTCT  
GGCCTCTCATGACGTCAAATCATGCTCATCGTGAAAAAGTTTTGGAGTATTT  
TTGGAATTTTTCAATCAAGTGAAAGTTTATGAAATTAATTTTCTGCTTTTGCT  
TTTTGGGGGTTTCCCCTATTGTTTGTCAAGAGTTTCGAGGACGGCGTTTTTCTT  
GCTAAAATCACAAGTATTGATGAGCACGATGCAAGAAAGATCGGAAGAAGG  
TTTGGGTTTGGAGGCTCAGTGGAAGGTGAGTAGAAGTTGATAATTTGAAAGTG  
GAGTAGTGTCTATGGGGTTTTTGCCTTAAATGACAGAATACATTCCCAATATA  
CCAAACATAACTGTTTAAAATTAACATTTTTCTAAATTTTATATGATTTCTTT  
TAAATTTGCAAAAATTACTTAAATTTGAATTCCCGCGCAAATGAGTGACTTCA  
TTTTCTGCATTATTGTGTTTTCCGGCTATAATTAATAGGTATTTGTTTGTGTTTT  
CTTATTTTATGATTCGAACTCCAATTTGTAAATTTTCGAACATATTTCCCTAA  
AGAAAAAATATGATTAATCTGGAAAAATTGGAAAATTATTTTTCAAATAAAA  
AACAAAGAAAAAAATGAAGAAAAACCTATTAGTTTGGCCATAAAACGCAAA  
AATGTCGAAAATGACGTCATCTGCGCGGGAAATCAAGAATAAATTCGGC  
CTTTTTATTTTTTTGGAAAATCGTAAAACATTTAGAAAAATTTTTTAATAGTT  
ATAGTGGGACTGTATTCTGTCAATTTAGGGCAAAGCCAGAGACGCTACTCCA  
CCGTGGGGGATCTCCATGGGGCTCAGCCTCAACCAATTTTATAGTGTAAAAA  
TTTGATTTTTTTCAGTTAAAAACGATGGTTTTTGTATGCTTTTTTACCTATTTTACA  
GATAGAAAATTTTTAAATTTTCGAAAAATCTTTAAAAATAAACTTTTTTGTGTTG  
GTTTTCGCTCGAAAATAGCTTTAAATTTGCAGTTTTTCTCTCAAAAACCTCTAA  
ATTTTCATGCGTTCCACGTGGCTTTCTATCAATTTAAATACTAATATTAATATTT  
TCTTCAAATCTGCCACGTTACAGCCTGCCATAGCCTTCTGAAACTCTACAAT  
TCCCCTCTAATCACTAGCGCCGCTCCCCGCACACTCAACACAGCGAGCGGC  
GGAACCCGCGGGGTGTGCGGCCGCTCGGACACGCTCCCGTATATAACGACGCG  
GCGCGCGTGGATCCCCGGTGGGGTTCCCGAGCGGCCAAAGGGAGCAGACTCT  
AAATCTGCCGTCATCGACTTCGAAGGTTTGAATCCTTCCCCCACCATATCTTT  
TTGAATTTACAGCATTTTTTCACTAGTCGGCCGTACGGGCCCTTTCGTCTCG  
CGGTTTTCGGTGATGACGGTGAAAACCTCTGACACATGCAGCTCCCGGAGAC  
GGTCACAGCTTGTCTGTAAGCGGATGCCGGGAGCAGACAAGCCCGTCAGGGC  
GCGTCAGCGGGTGTGGCGGGTGTGCGGGGCTGGCTTAACTATGCGGCATCAG  
AGCAGATTGTACTGAGAGTGCACCATATGCGGTGTGAAATACCGCACAGATG  
CGTAAGGAGAAAATACCGCATCAGGCGGCCTTAAAGGGCCTCGTGATACGCCT  
ATTTTTATAGTTAATGTCATGATAATAATGGTTTTCTTAGACGTCAGGTGGCA  
CTTTTCGGGGAAATGTGCGCGGAACCCCTATTGTTTATTTTTCTAAATACATT  
CAAATATGTATCCGCTCATGAGACAATAACCCTGATAAATGCTTCAATAATAT  
TGAAAAAGGAAGAGTATGAGTATTCAACATTTCCGTGTGCGCCCTTATCCCTT  
TTTTGCGGCATTTTGCCTTCTGTTTTTGTCTACCCAGAAACGCTGGTGAAAG  
TAAAAGATGCTGAAGATCAGTTGGGTGCACGAGTGGGTACATCGAACTGGA

TCTCAACAGCGGTAAGATCCTTGAGAGTTTTTCGCCCCGAAGAACGTTTTTCCAA  
TGATGAGCACTTTTAAAGTTCTGCTATGTGGCGCGGTATTATCCCGTATTGAC  
GCCGGGCAAGAGCAACTCGGTCGCCGCATACACTATTCTCAGAATGACTTGG  
TTGAGTACTCACCAGTCACAGAAAAGCATCTTACGGATGGCATGACAGTAAG  
AGAATTATGCAGTGCTGCCATAACCATGAGTGATAAACTGCGGCCAACTTA  
CTTCTGACAACGATCGGAGGACCGAAGGAGCTAACCGCTTTTTTGCACAACA  
TGGGGGATCATGTAACCTCGCCTTGATCGTTGGGAACCGGAGCTGAATGAAGC  
CATACCAAACGACGAGCGTGACACCACGATGCCTGTAGCAATGGCAACAAC  
GTTGCGCAAACCTATTAACCTGGCGAACTACTTACTCTAGCTTCCCGGCAACAAT  
TAATAGACTGGATGGAGGCGGATAAAGTTGCAGGACCACTTCTGCGCTCGGC  
CCTTCCGGCTGGCTGGTTTATTGCTGATAAATCTGGAGCCGGTGAGCGTGGGT  
CTCGCGGTATCATTGCAGCACTGGGGCCAGATGGTAAGCCCTCCCGTATCGT  
AGTTATCTACACGACGGGGAGTCAGGCAACTATGGATGAACGAAATAGACA  
GATCGCTGAGATAGGTGCCTCACTGATTAAGCATTGGTAACTGTCAGACCAA  
GTTTACTCATATACTTTAGATTGATTTAAAACCTTCATTTTTAATTTAAAAGG  
ATCTAGGTGAAGATCCTTTTTGATAATCTCATGACCAAATCCCTTAACGTGA  
GTTTTCGTTCCACTGAGCGTCAGACCCCGTAGAAAAGATCAAAGGATCTTCTT  
GAGATCCTTTTTTTCTGCGCGTAATCTGCTGCTTGCAAACAAAAAACCCCG  
CTACCAGCGGTGGTTTGTGGCCGATCAAGAGCTACCAACTCTTTTTCCGAA  
GGTAACTGGCTTACGACAGAGCGCAGATACCAAATACTGTCCTTCTAGTGTAG  
CCGTAGTTAGGCCACCACTTCAAGAACTCTGTAGCACCGCCTACATACCTCGC  
TCTGCTAATCCTGTTACCAGTGGCTGCTGCCAGTGGCGATAAGTCGTGTCTTA  
CCGGGTTGGACTCAAGACGATAGTTACCGGATAAGGCGCAGCGGTCCGGCTG  
AACGGGGGGTTCGTGCACACAGCCAGCTTGGAGCGAACGACCTACACCGA  
ACTGAGATACCTACAGCGTGAGCATTGAGAAAGCGCCACGCTTCCCGAAGGG  
AGAAAGGCGGACAGGTATCCGGTAAGCGGCAGGGTCGGAACAGGAGAGCGC  
ACGAGGGAGCTTCCAGGGGGAAACGCCTGGTATCTTTATAGTCCTGTCCGGT  
TTCGCCACCTCTGACTTGAGCGTCGATTTTTGTGATGCTCGTCAGGGGGGCGG  
AGCCTATGGAAAAACGCCAGCAACGCGGCCTTTTTACGGTTCCCTGGCCTTTTG  
CTGGCCTTTTGCTCACATGTTCTTTCCTGCGTTATCCCCTGATTCTGTGGATAA  
CCGTATTACCGCCTTTGAGTGAGCTGATACCGCTCGCCGCAGCCGAACGACC  
GAGCGCAGCGAGTCAGTGAGCGAGGAAGCGGAAGAGCGCCCAATACGCAA  
CCGCCTCTCCCCGCGCGTTGGCCGATTCATTAATGCAGCTGGCACGACAGGT  
TCCCGACTGGAAAGCGGGCAGTGAGCGCAACGCAATTAATGTGAGTTAGCTC  
ACTCATTAGGCACCCAGGCTTTACACTTTATGCTTCCGGCTCGTATGTTGTG  
TGGAATTGTGAGCGGATAACAATTTACACAGGAAACAGCT

*p5605-unc-54p::mCherryTAG156*

TGTGAAATTGTTATCCGCTGGTATCAGCTCACTCAAAGGCGGTAATACGGTTA  
TCCACAGAATCAGGGGATAACGCAGGAAAGAACATGTGAGCAAAAGGCCAG  
CAAAAGACCAGGAACCGTAAAAAGGCCGCGTTGCTGGCGTTTTTCCATAGGC  
TCCGCCCCCTGACGAGCATCACAAAATCGACGCTCAAGTCAGAGGTGGCG  
AAACCCGACAGGACTATAAAGATACCAGGCGTTTCCCCCTGGAAGCTCCCTC  
GTGCGCTCTCCTGTTCCGACCCTGCCGCTTACCGGATACCTGTCCGCCTTCTC

CCTTCGGGAAGCGTGGCGCTTTCTCATAGCTCACGCTGTAGGTATCTCAGTTC  
GGTGTAGGTCGTTTCGCTCCAAGCTGGGCTGTGTGCACGAACCCCCCGTTCAG  
CCCGACCGCTGCGCCTTATCCGGTAACTATCGTCTTGAGTCCAACCCGGTAAG  
ACACGACTTATCGCCACTGGCAGCAGCCACTGGTAACAGGATTAGCAGAGCG  
AGGTATGTAGGCGGTGCTACAGAGTTCTTGAAGTGGTGGCCTAACTACGGCT  
ACACTAGAAGGACAGTATTTGGTATCTGCGCTCTGCTGAAGCCAGTTACCTTC  
GGAAAAAGAGTTGGTAGCTCTTGATCCGGCAAACAAACCACCGCTGGTAGCG  
GTGGTTTTTTTTGTTTGCAAGCAGCAGATTACGCGCAGAAAAAAGGATCTCA  
AGAAGATCCTTTGATCTTTTCTACGGGGTCTGACGCTCAGTGGAACGAAAAC  
CACGTTAAGGGATTTTGGTCATGAGATTATCAAAAAGGATCTTCACCTAGATC  
CTTTTAAATTAATAAATGAAGTTTTAAATCAATCTAAAGTATATATGAGTAAAC  
TTGGTCTGACAGTTACCAATGCTTAATCAGTGAGGCACCTATCTCAGCGATCT  
GTCTATTTTCGTTTCATCCATAGTTGCCTGACTCCCCGTCGTGTAGATAACTACG  
ATACGGGAGGGCTTACCATCTGGCCCCAGTGCTGCAATGATACCGCGAGACC  
CACGCTCACCGGCTCCAGATTTATCAGCAATAAACCAGCCAGCCGGAAGGGC  
CGAGCGCAGAAGTGGTCCTGCAACTTTATCCGCCTCCATCCAGTCTATTAATT  
GTTGCCGGGAAGCTAGAGTAAGTAGTTCGCCAGTTAATAGTTTTCGCAACGT  
TGTTGCCATTGCTACAGGCATCGTGGTGTACGCTCGTCGTTTGGTATGGCTT  
CATTCAGCTCCGGTCCCAACGATCAAGGCGAGTTACATGATCCCCCATGTTG  
TGCAAAAAGCGGTTAGCTCCTTCGGTCCCTCCGATCGTTGTCAGAAGTAAGT  
GGCCGCAGTGTTATCACTCATGGTTATGGCAGCACTGCATAATTCTCTTACTG  
TCATGCCATCCGTAAGATGCTTTTCTGTGACTGGTGAGTACTCAACCAAGTCA  
TTCTGAGAATAGTGTATGCGGCGACCGAGTTGCTCTTGCCCGGCGTCAATACG  
GGATAATACCGCGCCACATAGCAGAACTTTAAAAGTGCTCATCATTGGAAAA  
CGTTCTTCGGGGCGAAAACCTCTCAAGGATCTTACCGCTGTTGAGATCCAGTTC  
GATGTAACCCACTCGTGCACCCAACCTGATCTTCAGCATCTTTTACTTTCACCA  
GCGTTTCTGGGTGAGCAAAAACAGGAAGGCAAAATGCCGCAAAAAGGGAA  
TAAGGGCGACACGGAAATGTTGAATACTCATACTCTTCCTTTTTCAATATTAT  
TGAAGCATTATCAGGGTTATTGTCTCATGAGCGGATACATATTTGAATGTAT  
TTAGAAAAATAAACAATAGGGGTTCCGCGCACATTTCCCCGAAAAGTGCCA  
CCTGACGTCTAAGAAACCATTATTATCATGACATTAACCTATAAAAATAGGC  
GTATCACGAGGCCCTTTCGTCTCGCGCGTTTCGGTGTGACGGTGAAAACCTC  
TGACACATGCAGCTCCCGGAGACGGTACAGCTTGTCTGTAAGCGGATGCCG  
GGAGCAGACAAGCCCGTCAGGGCGCGTCAGCGGGTGTGGCGGGTGTGCGG  
GCTGGCTTAACCTATGCGGCATCAGAGCAGATTGTAAGTGCACCATAT  
GCGGTGTGAAATACCGCACAGATGCGTAAGGAGAAAATACCGCATCAGGCG  
CCATTCGCCATTACGGCTGCGCAACTGTTGGGAAGGGCGATCGGTGCGGGCC  
TCTTCGCTATTACGCCAGCTGGCGAAAGGGGGATGTGCTGCAAGGCGATTAA  
GTTGGGTAACGCCAGCACGTGTGTTTTTGAACACGGCGATATGTATCTGTAGA  
TCATCCCCAATTTTCAACAATGAATCTAAATACTGAACTTTTTGTGTAATCTTT  
AGTGCAGAAAAATGACCAAAATCAGCGATTTTCCGATTATACCCAAAATATC  
TCAGCTCAATGAGCACCTATAAAAATGTAAAAATAAAGAAAGTAGTCGAACC  
ATATTTTGTAAGGCTAAAAAACTGAATAAATTTTTATCCATCCAGCGCGGCG  
TTACAATCCGTGGCCCATGTACGCACGGCTTTCAAAGAAAAAAAACAGTC  
TGTTTTCGCGGACATCGATCTGGCAAAAATCCTAAAACGACTATGCGTGGCT  
CACTTTATATTAATATGAAAAATACAACTTGGTGGTGCAGGTGCTGCAGAG



GCCATCGATGAAGAAGTGGAGGCCTTGTTGTCGATCTACAAAATTGTATGGT  
TGTTTGAGATTTTCCTTGAAACGCTCTCAATCTTGGATATGATATAAATTCTG  
GATAAGATATGATGGATATGATCTATGTTTGATAGAGTGCATTTGAAAGGAT  
AACGGCCCTGCAGACATTTTTGAAAAAATAACAAACATTTAATTTTCTCACTC  
GTTTAGGCTATTCCCCTATTTTTGATATTCCTTCGCACATATGAAAACACTTTT  
TTTTCGAAACTGTTAACTCCAGAATTTATAAATCTATAGCCCTTACTTGATTAT  
TTATTATCATGGTTACTCACCTCATGTCTCTTTCTCTTTTCAAGAAGTCTTCGT  
TCATATCTGTTGTCTCTTTCCTCCTTTTGAATCTCTGCTTTGCTCTTCGCCATTG  
TTTCTGAAAATAATGTAACCTGAAATTGTGTAATATACTTTTTTAATTTGAATT  
TGGCTTGTAACGCGGAATCACTACGTGCGGGATCATTCTTACTAGAAAACCC  
AGAAAATGCCATATTTCACTTATCTCGGGGTCAATTTCTAATTAGAAAAGCTAC  
AAAACCATTTCTAATTACGGTGACTTTAGAACTGGTCGAAATAGCTAATTA  
GAAATGGGTTTTTGCTAATTAGAGGTGACTCTATGTTATCTGAGTAAGCCTCG  
TTTGTATGAAACTCACAGTACTAATAAATGCAAGACACCCGGGTTTGTCTAG  
ATATGAAATAATTGAAATATCAATTCTGACAGACAATAATGGTAATCTTGAT  
AAGGAGTTCCACGCCAGGAGAACACGTTAGTTTTCTTGTTTTTGATTGCGTG  
CGTTATTTTGGAGAAAACCTCGATTTTTTACAAAATAATTTTTTGAAGGAAC  
ACTGTTCAATAAGTTTTGTCTTTTTTCTCAGTTGTGATACGGTTTTTTATCTTT  
TTTGTAGTTATACAGAAGACCGTTACGAAACAGACTGATATCGAAACAAACA  
CTGATCTTACTTGCACCTATAATACGACTCACTAGTTTTCTTCTCCTCTATA  
TATTTTTATGTTTTCTTTTAAACCTTCTCCATATTTCTGAATTGAATGTTGTTG  
CATATTGTGTGTCCTTATTTCAATTCATCATCCTTTTGTGTGTTTCCCCCTTCC  
ACCAATTCCCCCACGTCCTAATGAAATGAAAGCGAGAAGATAAATAAACTT  
GCACATTGTGTTTCAAGATGAGAGGAGCGGAATACGAATTGGGAGACGGAAAG  
AGAAAAAAAATGTTTAGATTTGGATTGAATTAATTTTTTAGAAAGCAAGAA  
AAAAAACACAAAGAGAATAAATAAATAATAGGAAAAAAAACAAATATTCAG  
TATTTAAAATTTGAAAATTCAACGACGTTGGCGTCGATCATCCGGATTACTTG  
TATGGCCGGCTAGCGAATTCTTACTTGTACAGCTCGTCCATGCCGCCGGTGGA  
GTGGCGGCCCTCGGCGCGTTCGTACTGTTCCACGATGGTGTAGTCCTCGTTGT  
GGGAGGTGATGTCCAACCTTGATGTTGACGTTGTAGGCGCCGGGCAGCTGCAC  
GGGCTTCTTGGCCTTGTAGGTGGTCTTGACCTCAGCGTCGTAGTGGCCGCCGT  
CCTTCAGCTTCAGCCTCTGCTTGATCTCGCCCTTCAGGGCGCCGTCTCGGGC  
TACATCCGCTCGGAGGAGGCCTCCCAGCCCATGGTCTTCTTCTGCATTACGGG  
GCCGTCGGAGGGGAAGTTGGTGCCGCGCAGCTTACCTTGTAGATGAACTCG  
CCGTCCTGCAGGGAGGAGTCTGGGTACGGTCACCACGCCGCCGTCTCGA  
AGTTCATCACGCGCTCCCACTTGAAGCCCTCGGGGAAGGACAGCTTCAAGTA  
GTCGGGGATGTCGGCGGGGTGCTTACGTAGGCCTTGGAGCCGTACATGAAC  
TGAGGGGACAGGATGTCCAGGCGAAGGGCAGGGGGCCACCCTTGGTCACC  
TTCAGCTTGGCGGTCTGGGTGCCCTCGTAGGGGCGGCCCTCGCCCTCGCCCTC  
GATCTCGAACTCGTGGCCGTTTACGGAGCCCTCCATGTGCACCTTGAAGCGC  
ATGAACTCCTTGTATGATGGCCATGTTATCCTCCTCGCCCTTGTCCACATTTTT  
TCTACCGGTACCCAAGGGTCTCCTGAAAATGTTCTATGTTATGTTAGTATCA  
TTCGAAACATACTTTGGGTCTTTGGCCAATCCCGAGGTTGATGATGCGAGT  
GATGAGTGCCTGCTTCTTCTCGGCAGGAGGATGTTGGCACCCGCAAGCCAC  
GCCCTCTTTGGGGATTCTACGAGGTGTAAGCTGTGTGCGGCAGCGGCAGC  
GGCGGGAGAGACGGGAACCGGCTTCCCAGGAATACACGAAGCGAGAGACGC

CTACGCGTAGTGGAGGGTGCCAGAGAAGATAGTGGAAGTCTCAAGAATTCCA  
TTGGAGCACGAAGAAAAACCAGGGATAGAGATAGATCGGGAGTTGGTAAG  
ATCGGGAAAAATGAATTCAGAGAGTACGGTTCGGTCAACTTTTTTATAGGAA  
AGTGCAGAACAGTGATAAAAGGAATAAGATAGAATGTTTACATACAACCAGT  
GAAAATAGAATACCAGTTTGATTAATGGTTCTTAAACAGATCTTCAGCCTCCT  
CTTGATAATCTTCCACGGTTCACCACTAGATCTTCAGATTTTAAGCAAATTCA  
ATACATTTACGACCTAAGTTAACTTGCCCTTTGCATTACTCTTTTTACAGAGA  
ACCAGTGAAAAACCGAAAATACTCACTGCAGGATTCAATCCCTTTGTTTAATT  
TTATGTTTCAGTTGCATTCCTTTAAGTTCTTCGAAATATAGACCCCTGTTACTT  
CTAACTTGTGCAATGAATCAAGCAGATCTTCTTCATCTTCTTTTCTTCAAACGT  
TTTTTCTTAGAAAAATATATCCTCACAATACCTTCTCTCTTCTTTGCCATCCCC  
AATGGCAGTATCTGATGCAAGGGAGCCTGTGGGGCTCGTCATCCACAGTGTA  
ATGTAAGATGGTTCAGAGATTCAGAAGAGAGGCAGAGATAGCCTCATCCCAC  
TCAATTGATGAGAGAATGGGATAGAGAGAAACATTTGAAAACGAGAAGAAA  
AAGAAGATAGAGGGAAGGAGTTTCGGGATTTTATGGGAATTTAGAAGAAGA  
CCTCGAGGAATTCCTGCAGGATATCTGGATCCACGAAGCTTCCCATGGTGAC  
GTCACCGGTTCTAGATACCTAGGTGAGCTCTGGTACCCTCTAGTCAAGGCCTT  
AAGTGAGTCGTATTACGTAGCCCGGGCCTAGTTCTAGACATTCTCTAATGAAA  
AAATCTTTCAGTTGAAATTGAAAATGAGTTAAAGTTGGAGTTTTTATTGAAA  
CAGATTTCCGTGTGATTAGTGTTTTTAGCGAGTGTGACAGGACAGCGAAAA  
ATATAGAAACAAGGGGGGAAGTAAAAGCTTAGGAATGCATTGAACATGAG  
AAGGGGAAGGGGAAGGAACAACTAGACAGGAATTATTGGAATTTAATCAC  
ATTTGGAGTTTTTTTTCTATTCGACAGAATAATTATCCAGAACATTTTTGTATT  
AAATATTTATGCATCATATGAGTAGTCGGCTTTGTTGTGCATGACGAGTTTGT  
TATCGACGAAATAGAAGCTGTCAGAACGAGTCTCGTTTGGATTGTTGATCAT  
GTCGTCCACTGAAAAAGAGATTAGTCTTTTGAATTGTACTTTTTAGAAATAATG  
ACTCACTGAGTTGTTGAGAGAGTTGAGGGAACTCATAGATATGTTCCAGTT  
GTTTCGTGAATTCGGAATACAGAATCCGAATTCAAAGTCAAAACACTTCAGA  
AGGCGATCTTTGAAGAAGTGACGTTTCGATCATTCGGAAATGATGGATTGGGA  
TGTCTCCTACTTTGAATTCCACAGTTGCTCCGACCGTTTTGAGTTTCAAAAAG  
TTTGGAGCAAATCTATAACGCACGTATCTTGCCGACTCCTGTGGCGACTCATC  
ATTCTCCTGATCGTTCTCCGGTTTGGCGATCTCGAAAAGCACTTGCTCAGTGT  
CCAGATCACGGATTTGGAAGTTGGTGAAGTTCGATGTTATAGATGTTTCGCAGAT  
GGGGAGCATAAGAATCCTAAATTTATGTTTTAAACTGAAATCCAAAGGGAGC  
AAGATACCTTGAGTGATTCCCGGAAGTGCTAAAACGTCGTTTCGGAGTGATTT  
GAGCTTTCTTCGCAAGCTCCGATTCCGTTGTGATTCCCTTGTTCGGTGCTTGGTG  
GTGGCCGTGGCATCTGGAAATATGGAAAAGTTCAACAAAAAGAAAAGAGAA  
AAGAATGAAATCGGATATCAAGAGTTAGTTGAGCGGTTTCTCTAGTTTTCTGA  
GTCTCACCTGCGACGGGAAGGTCGCCGAGCCGGGTGGAATCGATTGTTGTTG  
CTCGGCTTTCATATCGGTTTGGTTGGAAGCGGCTGAAAACGGAAAGAAGTGG  
AAGAAGGAAAAGAGTGTGGTGTGACAGGAAAATGGTAATTAGAGGGTGCCA  
AATAACCAGCTATATTTGTTTTTTTTTGAACATTTTTAAAAAGAAAATA  
CGATAATGATATCAGATGGATTTCCGGAAAAGTGGTATGAAAAATTTCAACC  
TTTTTGAGTACATGTAATCAAAATACACTTTGTAAATTATCATTTTTATTGAA  
ACTCCACCATTTTTCTATTTATAACGCTAATAATTTGAAAAAGAAACCTGTG  
CGAACCGCGGGGTGAATCCCAAAAACGAATGCGTTTTGGTGGAGTGATTGAT

TCGAATCGAAGAAGAAAAAGAAGAAGACGTGGAATAGAGAGCTCACTCTTA  
ACCGAGCAGCACACCCGACAGAAAAAAATGAAATGAATGAGGGTCTTC  
TTCTTCTTCTTCTTTCGAATGATTGACAGAAATGGGAAAAGAGGAAGATTGA  
GAAGGGAAAAGGAAGGAGAAAAGAAGCAGAAGAAGACGTCAGAGAGGAG  
AGGAACGAGCGGAAAAGCAGCGGGCGCAAGTCATAGAAGTAGCAGAGCTGG  
GGAGAAGAAGACACTATCCAAGAAAGGAATGACGAGAGAGTATGCAAAGGG  
GTATAGGGTGCAGACAGAATAGGAACAGAATAACAGATGATGAGCCAAGAA  
GAGTTGAAAAGGGCGATGAATTTGTCATGTA ACTTAATTTGGGTCAATTTGA  
GCATGATGAATTGAAATCATCCCTTGTGTTGGGAGTTAATAACCGGTTTGTATC  
AGAAACCCTGTAATAGAAGGGCGCCCTAACTTTGAGCCAATTCATCCCGGT  
TCTGTCAAATATATCAAAAAGTGGTCAACTGACAAATTGTTTTTGATATTATA  
ATAAACATTTTATCCGTTAACAATTTTTCGAATACTTTTTACAAGGACTTGGAT  
AAATTGGCTCAAAGACGAAGTGAGTTTGCTACCATCATGGAATCAGGAGGAC  
ATTTGACAATGTCATATAATGTTTGAAAAATGATTTTAACAAGGGTCTCATT  
CGAGATAAGCAATGCTCTGAGCAAGTGGCTCGTCGTCTTCAAGAATCTCTTGT  
TGATATTCATTTGGATCCTGTTTTGCACGAAGCATGTGCCATGGATATTCAGA  
GTTTTTGCAAAAAGTTCCGCCAGGTCAAACAATCTTTTTAATTTTTATATGA  
TACTTCGGGTGTATTTTTCTTCTTTTTCTGTTTCAATTTTCGCTTTTTTCTCACTTT  
TTTGTAACAAAATCTCTCACTTTTCTGTAAGTCTTAACAAAAGTTCAATTGGC  
TCGATCAAGTAAAATTTCCGCCGTATGAACGTTTTTCAAAGGTTTTCAATTTTTT  
TTAAGTTCATTCACAATATCATGAATCTCTCGTCCTTTGGTTTCCGGTAAGTA  
GCGAAATAATATAAGCATACTTATAAATGAAGGAATTGAATATAGAATAAGG  
AAAGCATAACTACCAATAACGGAATATAGAGGTAATACTGTAATGTACTGA  
TAACCACCATTACAGTATTCATTGAATATGCCACAGATTGAGCAATACTACG  
ATGTTTTTGAGGTACCAGTTCAGAGGATATAAACCACGAAATTGGACCAACT  
CCAGTTCTGAAATTTCAATTATTCGATTAAATCAAATATATTTGAAAACCTC  
ACCCATAAGTATAACCGTAGATGATCAATGCAACTAGGCATCCGTATTTTCATC  
GGGTCAATCAGAATACGTATTTTTGCGAAGAATACGAATGCAATTAGAGCTA  
AATTATTGAGAAATGTGAAGAGAAGGAGAAGCTTGCGTCGACCAACTCTGTA  
AACTTATTCATAACAATTTTGTCTTCAAATTTTGAACGTTTAAAACCTATCTTATT  
CAATGAGTTAGCGGGTTTTTATAGTGAGTTAGTTCACGATTATCTAATAAAAC  
TATGTCCAAACATCCTAACTGCGACCGTATTCTCACTAACTCGTCTTAAAAC  
GTTGAGATTATTTTAAACCCTTCTTCAGTACAACCTACAGTACTGATGCACAAA  
TACAATAATAATAACATTCAGACATACTCTGAACAATGTAACCTGTTTTTTG  
TTATACTGTGGTAACATTTATTGAAATGAAATATAACCTTACTTTTCAATCAC  
AATTCCACCAGTAATTGTTCCAGAAACATAAGCTAAACCCATTGCAGTTGTAC  
TCCATTCAGCAATTTCTGACTCAACATTTGCATTTTCTAGAAAGAAAGTAGAG  
GATAAAAGAAGAGCCCATAATCCGACAGGGCCC

*p4348-unc-54p::luciferaseTAG185*

GTATAGAAAAGTTGCCATAAAATCCCGAAACTCCTTCCCTCTATCTTCTTTT  
TCTTCTCGTTTTCAAATGTTTCTCTCTATCCATTCTCTCATCAATTGAGTGGG  
ATGAGGCTATCTCTGCCTCTTCTGAATCTCTGAACCATCTTACATTACACTG  
TGGATGACGAGCCCCACAGGCTCCCTTGCATCAGATACTGCCATTGGGGATG

GCAAAGAAGAGAGAAGGTATTGTGAGGATATATTTTTCTAAGAAAAACGTT  
TGAAGAAAAGAAGATGAAGAAGATCTGCTTGATTCATTGCACAAGTTAGAAG  
TAACAGGGGTCTATATTTTGAAGAAGCTTAAAGGGAATGCAACTGAACATAAA  
ATTAACAAAGGGATTGAATCCTGCAGTGAGTATTTTCGGTTTTTCACTGGTT  
CTCTGTAAAAAGAGTAATGCAAAGGGCAAGTTAACTTAGGTCGTAATGTAT  
TGAATTTGCTTAAAATCTGAAGATCTAGTGGTGAACCGTGGAAAGATTATCAA  
GAGGAGGCTGAAGATCTGTTTAAAGAACCATTAATCAAACCTGGTATTCTATTTT  
CACTGGTTGTATGTAAACATTCTATCTTATTCTTTTTATCACTGTTCTGCACTT  
TCCTATAAAAAAAGTTGACCGACCGTACTCTCTGAATTCATTTTTCCCGATCT  
TACCAACTCCCGATCTATCTCTATCCCTGGTTTTTTCTTCGTGCTCCAATGGAA  
TTCTTGAGACTTCCACTATCTTCTCTGGCACCCCTCCACTACGCGTAGGCGTCT  
CTCGCTTCGTGTATTCCCGGGAAGCCGGTTCCCGTCTCTCCCGCCGCTGCCGC  
TGCCGCACACAGCTTTACACCTCGTAGAATCCCCAAAGAGGGGGCGTGGCTTG  
CGGGTGCCAACATCCTCCTGCCGAGGAAGAAGCAGGCACTCATCACTCGCAT  
CATCAACCTCGGGATTGGCCAAAGGACCCAAAGGTATGTTTTCGAATGATACT  
AACATAACATAGAACATTTTTAGGAGGACCCTTGCAAGTTTGTACAAAAAAG  
CAGGCTGGTAGAAAAAATGGAAGACGCCAAAAACATAAAGAAAGGCCCGGT  
GCCATTCTATCCGCTAGAGGATGGAACCGCTGGAGAGCAACTGCATAAGGCT  
ATGAAGAGATACGCCCTGGTTCCTGGAACAATTGCTTTTACAGATGCACATAT  
CGAGGTGAACATCACGTACGCGGAATACTTCGAAATGTCCGTTCCGGTTGGCA  
GAAGCTATGAAACGATATGGGCTGAATACAAATCACAGAATCGTCGTATGCA  
GTGAAAACCTCTCTTCAATTCTTTATGCCGGTGTGGGGCGCGTTATTTATCGGA  
GTTGCAGTTGCGCCCGCGAACGACATTTATAATGAACGTGAATTGCTCAACA  
GTATGAACATTTTCGCAGCCTACCGTAGTGTGTTGTTTCCAAAAAGGGGTTGCAA  
AAAATTTGAAACGTGCAAAAAAATTACCAATAATCCAGAAAATTATTATCA  
TGGATTCTAAAACGGATTACCAGGGATTTAGTCGATGTACACGTTCCGTCACA  
TCTCATCTACCTCCCGGTTTTAATGAATACGATTTTGTACCAGAGTAGTTTGA  
TCGTGACAAAACAATTGCACTGATAATGAATTCCTCTGGATCTACTGGGTTAC  
CTAAGGGTGTGGCCCTTCCGCATAGAAGTGCCTGCGTCAGATTCTCGCATGCC  
AGAGATCCTATTTTTGGCAATCAAATCATTCCGGATACTGCGATTTTAAGTGT  
TGTTCCATTCCATCACGGTTTTTGGAAATGTTTACTACACTCGGATATTTGATATG  
TGGATTTTCGAGTCGTCTTAATGTATAGATTTGAAGAAGAGCTGTTTTTACGAT  
CCCTTCAGGATTACAAAATTCAAAGTGCCTGCTAGTACCAACCCTATTTTCA  
TTCTTCGCCAAAAGCACTCTGATTGACAAATACGATTTTATCTAACTTACACGA  
AATTGCTTCTGGGGGCGCACCTCTTTCGAAAGAAGTCGGGGAAGCGGTTGCA  
AACGCTTCCATCTTCCAGGGATACGACAAGGATATGGGCTCACTGAGACTA  
CATCAGCTATTCTGATTACACCCGAGGGGGATGATAAACCGGGCGCGGTCGG  
TAAAGTTGTTCCATTTTTTGAAGCGAAGGTTGTGGATCTGGATACCGGGAAA  
ACGCTGGGCGTTAATCAGAGAGGCGAATTATGTGTCAGAGGACCTATGATTA  
TGTCCGGTTATGTAAACAATCCGGAAGCGACCAACGCCTTGATTGACAAGGA  
TGGATGGCTACATTCTGGAGACATAGCTTACTGGGACGAAGACGAACACTTC  
TTCATAGTTGACCGCTTGAAGTCTTTAATTAATAACAAAGGATACCAGGTGGC  
CCCCGCTGAATTGGAGTCGATATTGTTACAACACCCCAACATCTTCGACGCG  
GGCGTGGCAGGTCTTCCCGACGATGACGCCGGTGAACCTCCCGCCCGCGTTG  
TTGTTTTGGAGCACGGAAAGACGATGACGGAAAAAGAGATCGTGGATTACGT  
CGCCAGTCAAGTAACAACCGCGAAAAAGTTGCGCGGAGGAGTTGTGTTTTGTG

GACGAAGTACCGAAAGGTCTTACCGGAAAACCTCGACGCAAGAAAAATCAGA  
GAGATCCTCATAAAGGCCAAGAAGGGCGGAAAGTCCAAATTGTAAACCCAG  
CTTTCTTGTACAAAGTGGGTGATATCTGAGCTCCGCATCGGCCGCTGTCATCA  
GATCGCCATCTCGCGCCCGTGCCTCTGACTTCTAAGTCCAATTACTCTTCAAC  
ATCCCTACATGCTCTTTCTCCCTGTGCTCCCACCCCTATTTTTGTTATTATCA  
AAAACTTCTCTTAATTTCTTTGTTTTTACTTCTTTTAAGTCACTCTAACA  
ATGAAATTGTGTAGATTCAAAAATAGAATTAATTCGTAATAAAAAGTCGAAA  
AAAATTGTGCTCCCTCCCCCATAATAATAATTCTATCCCAAATCTACACA  
ATGTTCTGTGTACACTTCTTATGTTTTTACTTCTGATAAATTTTTTTGAAACA  
TCATAGAAAAACCGCACACAAAATACCTTATCATATGTTACGTTTCAGTTTA  
TGACCGCAATTTTTATTTCTTCGCACGTCTGGGCCTCTCATGACGTCAAATCA  
TGCTCATCGTGAAAAAGTTTTGGAGTATTTTTGGAATTTTCAATCAAGTGAA  
AGTTTATGAAATTAATTTTCCTGCTTTTGTCTTTTGGGGTTTCCCCTATTGTTT  
GTCAAGATTTTCGAGGACGGCGTTTTTCTTGCTAAAATCACAAGTATTGATGAG  
CACGATGCAAGAAAGATCGGAAGAAGGTTTGGGTTTGGAGGCTCAGTGGAAG  
GTGAGTAGAAGTTGATAATTTGAAAGTGGAGTAGTGTCTATGGGGTTTTTGCC  
TTAAATGACAGAATACATTCCCAATATACCAAACATAACTGTTTCCAACTTTA  
TTATACATAGTTGATAATTCCTGGCCGTCGTTTTACTCTCGAGACGTACGGT  
GCGCGCGATGCATTCGAAGATCTGCCACTAGTGAGTCGTATTATAAGTGCA  
AGTAAGATCAGTGTGTTTGTATTTTCAAGTAATCAATTATTTTTCGCTCCCCCTCCT  
CGCAAGTCGGCGATTTCTTTGAAGTTTTGTCAAAGAAGAGACAAGGACTTG  
ATAGATACGCTCATCAGAGTGAGATTCATTGCAAATAGTGTGTAATTCGTGG  
AGAGACGAGAGAAAAGGTGTGAGAAGCTTAGAAGATAAAGAATAGGAAGA  
AGAACATATCTCATTTCCTATTTTCTCTAATTTTTCGTTCATTTTTCTAGACATT  
ACCCATTTGATGGTTTTTCAATATGGTTATCAGGGTACTCATTITGGTAGTTTT  
CAAAGCAATTTGGAGTTTTTTTTTAAATTGTCAACTACAAAACGCAGCTTAA  
AGGTCCAAATATCATAGTATAAAAATTTCTTTAAAAAATTCCAAATTTTATATG  
ATTTTTGAAAATTGGAAGAATGTTAGTTTTTGGCATTTTTTTGGAAAGTTTTTC  
TCCGGATTTTATGGTACTTATAATTTCAAATATAAATTTTTGTAGGAATTCGAG  
TATGCGAGAGAGCTATAGTTTACTAAAAAAAAGTGGCAAAAACCTCAGTAATT  
GCCACTTTTTTCAAATGTTTTGAAAAATTTTACTATGATATTTGGCCATTTT  
GGCACCATATGTACGTTACTTTTTACGAAACACTCTAATTTTTGAAATTTGAG  
TTTCATGTTAATCTTTTGTATAAAATTTTTATGGTCCTTTTGTGACAGGATAA  
AAAATTGCAAAAAAATAGAAAACCTTTGTTTCGTGAAAACACCTAGTTTAAAA  
ATTGTGGGCCACTTAGCGATTCTAGTCAAATCAGACAAATGTCAGCTGCC  
GTAACTTTTTCCGGATCAGGGTTATCAAATTTAATTTAATTGTAATGTAG  
AAAAATGATCGGCAACATTTTGTAAATTGAAAATATTTTGAATTTGCTATAG  
TACATATTAATCTAGTATTAATATAGTATTAATGTTATAATATCAGTTATGTG  
TTTGAATAACTCAAGCGTAAGTTTCCGTAAAATATCTTTAAATTTTGGTAATT  
TTTTACGGTTTTGGTATAAATTTTTGCATTTTTTGTATTTCTACACTTTTTTCGA  
TTTCGCATTTTCCGAATTTCTCTGAAATAAATCGAACAATCGGAAAATTTTCG  
AGGGCACCCCTTAGCCATGCAGCTCAGGAATTTGACTTTATGTTCCCATTCAAA  
TTTTTTTAAATTAATAAAAATGCTAATTGTAAGATAAATTACAAAATTTATT  
AAATCTCATCCTTATGATGATAGTGCAGTGCATGAATATATTTTTCCAAA  
TAGGATATGATTCGTGAGTAGCTTCACGTAATCCGTTTTCTTCAATCACCAT  
TTCGAACTGCAATTTTTTTTTTGGATTTTTGTAACAATATTGTCATAAATTGTG

ATTTTGATATTTTGC GTAGAGCATCAGAACCTTTCTGCTTTGAATTTTAATGG  
GATTA AAAAATTATAAAAACTTGCACCCTAATTAAGCGCGATACCTGGTGA  
CCCATGGTCATAGCTGTTTCCTGTGTGAAATTGTTATCCGCTCACAATTCCAC  
ACAACATACGAGCCGGAAGCATAAAGTGTAAGCCTGGGGTGCCTAATGAGT  
GAGCTAACTCACATTACATGTGAGCAAAAGGCCAGCAAAAGGCCAGGAACC  
GTAAAAAGGCCGCGTTGCTGGCGTTTTTCCATAGGCTCCGCCCCCTGACGA  
GCATCACAAAAATCGACGCTCAAGTCAGAGGTGGCGAAACCCGACAGGACT  
ATAAAGATACCAGGCGTTTCCCCCTGGAAGCTCCCTCGTGCGCTCTCCTGTTT  
CGACCCTGCCGCTTACCGGATACCTGTCCGCTTTCTCCCTTCGGGAAGCGTG  
GCGCTTTCTCATAGCTCACGCTGTAGGTATCTCAGTTCGGTGTAGGTCGTTTCG  
CTCCAAGCTGGGCTGTGTGCACGAACCCCGTTTCAGCCCGACCGCTGCGCC  
TTATCCGGTAACTATCGTCTTGAGTCCAACCCGGTAAGACACGACTTATCGCC  
ACTGGCAGCAGCCACTGGTAACAGGATTAGCAGAGCGAGGTATGTAGGCGGT  
GCTACAGAGTTCTTGAAGTGGTGGCCTAACTACGGCTACACTAGAAGAACAG  
TATTTGGTATCTGCGCTCTGCTGAAGCCAGTTACCTTCGGA AAAAAGAGTTGGT  
AGCTCTTGATCCGGCAAACAAACCACCGCTGGTAGCGGTGGTTTTTTTTGTTT  
CAAGCAGCAGATTACGCGCAGAAAAAAGGATCTCAAGAAGATCCTTTGATC  
TTTTCTACGGGGTCTGACGCTCAGTGGAAACGAAA ACTCACGTTAAGGGATTTT  
GGTCATGAGATTATCAAAAAGGATCTTCACCTAGATCCTTTTACGCGCCCTGT  
AGCGGCGCATTAAAGCGCGGGCGGGTGTGGTGGTTACGCGCAGCGTGACCGCTA  
CACTTGCCAGCGCCCTAGCGCCCGCTCCTTTTCGCTTTCTTCCCTTCCTTTCTCG  
CCACGTTTCGCTTTCCCGTCAAGCTCTAAATCGGGGGCTCCCTTTAGGGTTCC  
GATTTAGTGCTTTACGGCACCTCGACCCCAAAAACTTGATTTGGGTGATGGT  
TCACGTAGTGGGCCATCGCCCTGATAGACGGTTTTTTCGCCCTTTGACGTTGGA  
GTCCACGTTCTTTAATAGTGGACTCTTGTTCAAA ACTGGAACAACACTCAACC  
CTATCTCGGGCTATTCTTTTGATTTATAAGGGATTTTGCCGATTTCCGGCCTATT  
GGTAAAAAATGAGCTGATTTAACAAAAATTTAACGCGAATTTTAACAAAAT  
ATTAACGTTTACAATTTAAATATTTGCTTATACAATCTTCCTGTTTTTGGGGCT  
TTTCTGATTATCAACCGGGGTAAATCAATCTAAAGTATATATGAGTAAACTTG  
GTCTGACAGTTACCAATGCTTAATCAGTGAGGCACCTATCTCAGCGATCTGTC  
TATTTTCGTTTCATCCATAGTTGCCTGACTCCCCGTCGTGTAGATAACTACGATA  
CGGGAGGGCTTACCATCTGGCCCCAGTGCTGCAATGATACCGCGAGACCCAC  
GCTCACCGGCTCCAGATTTATCAGCAATAAACCAGCCAGCCGGAAGGGCCGA  
GCGCAGAAGTGGTCCTGCAACTTTATCCGCCTCCATCCAGTCTATTAATTGTT  
GCCGGGAAGCTAGAGTAAGTAGTTCGCCAGTTAATAGTTTTCGCAACGTTGT  
TGCCATTGCTACAGGCATCGTGGTGTACGCTCGTCGTTTGGTATGGCTTCAT  
TCAGCTCCGGTTCCCAACGATCAAGGCGAGTTACATGATCCCCCATGTTGTGC  
AAAAAAGCGGTTAGCTCCTTCGGTCTCCGATCGTTGTCAGAAGTAAGTTGG  
CCGCAGTGTTATCACTCATGGTTATGGCAGCACTGCATAATTCTCTTACTGTC  
ATGCCATCCGTAAGATGCTTTTCTGTGACTGGTGAGTACTCAACCAAGTCATT  
CTGAGAATAGTGTATGCGGCGACCGAGTTGCTCTTGCCCGGCGTCAACACGG  
GATAATACCGCGCCACATAGCAGAACTTTAAAAGTGCTCATCATTGGAGAAC  
GTTCTTCGGGGCGAAA ACTCTCAAGGATCTTACCGCTGTTGAGATCCAGTTTCG  
ATGTAACCCACTCGTGACCCAACTGATCTTCAGCATCTTTTACTTTACCCAG  
CGTTTCTGGGTGAGCAAAAACAGGAAGGCAAAATGCCGCAAAA AAGGGAAT  
AAGGGCGACACGGAAATGTTGAATACTCATACTCTTCCTTTTTCAATATTATT

GAAGCATTTATCAGGGTTATTGTCTCATGAGCGGATACATATTTGAATGTATT  
TAGAAAAATAAACAAATAGGGGTTCCGCGCACATTTCCCCGAAAAGTGCCAC  
CTGACGTAGTTAACAAAAAAGCCCGCCGAAGCGGGCTTTATTACCAAGCG  
AAGCGCCATTCGCCATTCAGGCTGCGCAACTGTTGGGAAGGGCGATCGGTGC  
GGCCTCTTCGCTATTACGCCAGCTGGCGAAAGGGGGATGTGCTGCAAGGCG  
ATTAAGTTGGGTAACGCCAGGGTTTTCCAGTCACGACGTTGTAACGACG  
GCCAGTTGATCAGTCGATCCAAGTGGGGATCAGGAAGAAGTTGATAAAGTGA  
TTCAAAAACCTCGAGGAGCTCAACACAGCGATGAACCCAATTTTGAGAGCAAC  
ACTGACGAAGAACTATGACGCGAGGGTAGGCACTACCTTGAAGCTATCCACC  
TGCCTGCCTGCCGCCTATTTCCATGTGCAGTAGGAACGTGTGTAGGTATAGGC  
AGGCATTATCGCGTCTCCTTTCGAACTACCTAGTACCTAGTAGGTAGTTTGAA  
GGGAGGCGCGATAATGCCTGCCTATGTCTACACATGTGCCTACTGCGCATGG  
AAATAGGCGGTAGTCAGGCAGGTAGATAGCCTCATAAAATTCATACTTCCT  
TTTCAGAAAGAATGCTGGAATGTATTCAAAGAGGAGTCACTCTTCCCATTGCT  
CAGAGAATATGAAGAGTTGCTCGGCGAGCAAAGTTCATGATTGGAGATCGA  
TATTCATGGGCTGACATCGCTGTCGTCGAGTTTCTAACTCGGTGTCAGCAGTG  
CTACGATAGCTTCTATCTGGCTCATTTTCGAGAGGCTCCGAACTTTTTGCCAGA  
CTTTTGAGTCTCTTCCGCACATTCGTCCCTACATTCAGGGACGTGTTGATTTCAT  
TTATCTAATTTTTTAAAATGGATATTTTTTCGTTTTTTATTTGTTTGTGTTTCTGA  
TAATTCATAAAGTTACGCAACGAATTTTAGACATTTATGAAAACCGAAAAT  
CGACAAAAATATTTTAAGAAAAATAGCAGCAAATTCATATTTTATCAAT  
TTTGTTTATGGTAATGAGAAAGAAAACATAACAATATTTTTCTAAGAAGAAGA  
AAAATGACCAGAATTTTAAGATTTTTCTCGAATATACGAAAAATTGATAAAC  
TAAAATTTTCGATTTTTCCATTTATTTGAAAAAAAACCTTTGACGGTTTTCA  
CCATGCGAAGAGGTGAGAAATATTCTGAAAGTTATGCATTTTGAAAAAATTG  
CAAAAAAATACGTTAAAATTTTTGATCTATTGTTTTTTTTGAAAACCGGAA  
TTTTAAATGGAATTTTTTTTTCAAAAATTAATAAATTAATAATTTTCTAG  
TGTTTGGATAGTTTTTCAAAGCTAGATTTAACCCGCGAGATGTCGACCGCTA  
GTGTAGCTTACAGATGGCTGAAGACTTCGCAAAAATCTTATCTTAGAAACCC  
GCGAGGTGTCGGCCGCTAAAACCTTTGTAAACCTGCCAACAAAATGCTTCGCA  
TTGTCTGAACAGATGAAACCTTGAAACAAAACATATACAATTGAAATCCCGT  
AAAGTGTCCGGGCGCAAGAACTGCGATTAGTTGTATAATTGGACTAGCTCAA  
TTTGACCAAATCTCATTTTTTAGACCTCTAAGATGTTCGGCCACTATAACTTTA  
TTCAACTTGAACTGCAAAAAAACTTATCAACTGTATAGATTCAAGTATTATG  
TCAAGTATTGGTTTTAGAGCTACAGTACACTCTGATAACAAAATCTGCAGAA  
ATACCTCCCTGTCAATTCCTAAAATACCTCCCCTCATCTCAATTATCCCGAAA  
ATCGGTTAGTCATTGCCATCAGAAAATCGAATTAATAAATAAAGATGAAATA  
TGGTAGCAAACCTCACTTCGTCTTTGAGCCAATTTATCCAAGTCCTTGTAATA  
GTATTCGAAAATTGTTAACGGATAAAAATGTTTATTATAATATCAAAAACAATT  
TGTCAGTTGACCACTTTTTGATATATTTGACAGAAACCGGGATGAATTGGCTC  
AAAGTTAGGGCGCCCTTCTATTACAGGGTTTCTGATAACAAACCGGTTATTAA  
CTCCAACAAGGGATGATTTCAATTCATCATGCTCAAATTGACCCAAATTAAG  
TTACATGACAAATTCATCGCCCTTTCAACTCTTCTTGGCTCATCATCTGTTAT  
TCTGTTCTATTCTGTCTGCACCCTATACCCCTTTGCATACTCTCTCGTCATTC  
CTTTCTTGGATAGTGTCTTCTTCTCCCCAGCTCTGCTACTTCTATGACTTGCGC  
CCGCTGCTTTTTCCGCTCGTTCCCTCTCTCTGACGTCTTCTTCTGCTTCTTTTC

TCCTTCCTTTTTCCCTTCTCAATCTTCCTCTTTTTCCCATTTCTGTCAATCATTC  
GAAGAAGAAGAAGAAGAAGACCCTCATTCATTTCTTTTTTTTTCTGTCCGGTG  
TGTGCTGCTCGGTTAAGAGTGAGCTCTCTATTCCACGTCTTCTTCTTTTTCTTC  
TTCGATTCGAATCAATCACTCCACCAAAAACGCATTCGTTTTTTGGGATTCACCC  
CGCGGTTTCGAATAGGTTTTCTTTTTCAAATTATTAGCGTTATAAATAGAAAAA  
TGGTGGAGTTTCAATAAAAATGATAATTTACAAAGTGTATTTTGATTACATGT  
ACTCAAAAAGGTTGAAATTTTTTCATACCAGTTTTCCGGAAATCCATCTGATAT  
CATTATCGTATTTTTCTTTTTAAAAATGTTTTCAAAAAAAAAACAAAATATAGC  
TGTTATTTGGCACCTCTAATTACCATTTTCCTGTCACACCACACTCTTTTTCC  
TTCTTCCACTTCTTCCGTTTTTCAGCCGCTTCCAACCAACCGATATGAAAGC  
CGAGCAACAACGATCGATTCCACCCGGCTCGGCGACCTTCCCGTTCGCAGGTG  
AGACTCAGAAAACACTAGAGAAACCGCTCAACTAACTCTTGATATCCGATTTCA  
TTCTTTTCTCTTTTTCTTTTTGTTGAACTTTTCCATATTTCCAGATGCCACGGCCA  
CCACCAAGCACCGAACAAGGAATCACAACGGAATCGGAGCTTGCGAAGAAA  
GCTCAAATCACTCCGAACGACGTTTTAGCACTTCCGGGAATCACTCAAGGTAT  
CTTGCTCCCTTTGGATTTAGTTTTAAAACATAAATTTAGGATTCTTATGCTCCC  
CATCTGCGAACATCTATAACATCGAGTTCACCAAGTTCCAAATCCGTGATCTG  
GACACTGAGCAAGTGCTTTTCGAGATCGCCAAACCGGAGAACGATCAGGAGA  
ATGATGAGTCGCCACAGGAGTCGGCAAGATACGTGCGTTATAGATTTGCTCC  
AACTTTTTGAAACTCAAACGGTCGGAGCAACTGTGGAATTCAAAGTAGGA  
GACATCCCAATCCATCATTTCCGAATGATCGAACGTCACTTCTTCAAAGATCG  
CCTTCTGAAGTGTTTTGACTTTGAATTCGGATTCTGTATTCCGAATTCACGAA  
ACAACGTGAACATATCTATGAGTTCCTCAACTCTCTCAACAACACTCAGTGAG  
TCATTATTCTAAAAAGTACAATTCAAAAGACTAATCTCTTTTTTCAGTGGACGA  
CATGATCAACAATCCAAACGAGACTCGTTCTGACAGCTTCTATTTTCGTCGATA  
ACAAACTCGTCATGCACAACAAGCCGACTACTCATATGATGCATAAATATT  
TAATACAAAATGTTCTGGATAATTATTCTGTGCAATAGAAAAAAAACCTCCA  
AATGTGATTAAATTCCAATAATTCCTGTCTAGTTTTGTTCCCTTCCCCTTCCCCTT  
CTCATGTTCAATGCATTCCTAAGCTTTTCAGTTCCCCCTTGTTTTCTATATTTTT  
TCGCTGTCCTGTCACACTCGCTAAAAACACTAATCACACGGAAATCTGTTTTC  
AATAAAAACCTCAACTTTAACTCATTTTCAATTTCAACTGAAAGATTTTTTCA  
TTAGAGAATGTCTAGAACTAGGCCCGGGCTACGTAATACGACTCACTTAAGG  
CCTTGACTAGAGGGTACCAGAGCTCACCTAGGCAGGAACAGCTATGACCATG  
ATTACGCCAAGCTATCAACTTT

*p5605-rpr-1p*:: tRNA<sup>Leu</sup><sub>CUA</sub> 3x

GTATAGAAAAGTTGGGCTCAGCCTCAACCAATTTTTAGTGTTAAAAATTTGAT  
TTTTTCAGTTAAAAACGATGGTTTTTIGATGCTTTTTACCTATTTTACAGATAGA  
AAATTTTAAATTTTCGCAAAAATCTTTAAAAATAAACTTTTTTGTGTTTTCG  
CTCGAAAATAGCTTTAAATTTGCAGTTTTTCTCTCAAAAACCTCTAAATTTTCA  
GCGTTCCACGTGGCTTTCTATCAATTTAAATACTAATATTAATATTTTCTTCAA  
AATCTGCCACGTTACAGCCTGCCATAGCCTTCTGAAACTCTACAATTCCCCTC  
TAATCACTAGCGCCGCTCCCCGCACACTCAACACAGCGAGCGGCGGAACCC  
GCGGGGTGTCGGCCGCTCGGACACGCTCCCGTATATAACGACGCGGCGCGCG



TGGATCCCCGCCCCGGATGGTGGGAATCGGTAGACACAAGGGATTCTAAATCCC  
TCGGCGTTCGCGCTGTGCGGGTTCAAGTCCCCTCCGGGTATATCTTTTTGAA  
TTTACAGCATTTCATCAAGTTTGTACAAAAAGCAGGCTGGCTCAGCCTCA  
ACCAATTTTAGTGTTAAAAATTTGATTTTTTCAGTTAAAAACGATGGTTTTTG  
ATGCTTTTTACCTATTTTACAGATAGAAAATTTTAAATTCGCAAAAATCTTT  
AAAAATAAATTTTTTTGTTTGGTTTTCGCTCGAAAATAGCTTTAAATTTGCAG  
TTTTTCTCTCAAAAATCTAAATTTTCATGCGTTCCACGTGGCTTTCTATCAATT  
TAAATACTAATATTAATTTTTCTTCAAAAATCTGCCACGTTACAGCCTGCCAT  
AGCCTTCTGAACTCTACAATTCCTCTAATCACTAGCGCCGCTCCCCGCA  
CACTCAACACAGCGAGCGGCGGAACCCGCGGGGTGTCGGCCGCTCGGACAC  
GCTCCCGTATATAACGACGCGGCGCGCTGGATCCCCGCCCCGGATGGTGGAA  
TCGGTAGACACAAGGGATTCTAAATCCCTCGGCGTTCGCGCTGTGCGGGTTC  
AAGTCCCCTCCGGGTATATCTTTTTGAATTTACAGCATTTCATACCCAGCT  
TTCTTGTACAAAGTGGGGCTCAGCCTCAACCAATTTTAGTGTTAAAAATTTG  
ATTTTTTCAGTTAAAAACGATGGTTTTTGATGCTTTTTACCTATTTTACAGATA  
GAAAATTTTAAATTTTCGCAAAAATCTTTAAAAATAAATTTTTTTGTTTGGTTTT  
CGCTCGAAAATAGCTTTAAATTTGCAGTTTTTCTCTCAAAAATCTAAATTTTC  
ATGCGTTCCACGTGGCTTTCTATCAATTTAAATACTAATATTAATTTTTCTTC  
AAAATCTGCCACGTTACAGCCTGCCATAGCCTTCTGAACTCTACAATTCCTTC  
TCTAATCACTAGCGCCGCTCCCCGCACACTCAACACAGCGAGCGGCGGAAC  
CCGCGGGGTGTCGGCCGCTCGGACACGCTCCCGTATATAACGACGCGGCGCG  
CGTGGATCCCCGCCCCGGATGGTGGGAATCGGTAGACACAAGGGATTCTAAATC  
CCTCGGCGTTCGCGCTGTGCGGGTTCAGTCCCCTCCGGGTATATCTTTTTG  
AATTTACAGCATTTCATCAACTTTATTATACATAGTTGATAATTCAGTGGCC  
GTCGTTTTACTCTGAGACGTACGGTGCAGCGGATGCATTCGAAGATCTGCCC  
ACTAGTGAGTCGTATTATAAGTGCAAGTAAGATCAGTGTGTTTCGATATCA  
GTCTGTTTCGTAACGGTCTTCTGTATAACTACAAAAAGAATAAAAAACCGT  
ATCACAACTGAGAAAAAGACAAAATTTATTGAACAGTGTTCTTTCAAAAA  
ATTATTTTGTAAAAATCGAGTTTTTCTCCAAAATAACGCACGCAATCAAAAA  
CAAGAAAATAACGTGTTCTCCTGGGCGTGGAATCCTTATCAAGATTACCAT  
TATTGTCTGTCAGAATTGATATTTCAATTTTCATATCTAGACAAACCCGGG  
TGTCTTGCATTTATTAGTACTGTGAGTTTACATACAAACGAGGCTTACTCAGA  
TAACATAGAGTCACCTCTAATTAGCAAAAACCCATTTCTAATTAGCTATTTTCG  
ACCAGTTCTAAAGTCACCGTAATTAGAAATGGTTTTTTGTAGCTTTTCTAATTA  
GAAATGACCCCGAGATAAGTGAAATATGGCATTTCCTGGGTTTTCTAGTAAG  
AAATGATCCCGCACGTAGTGATTCCGCGTTACAAGCCAATTCAAATTAATA  
AAGTATATTACACAATTCAAGTTACATTTTTTCAGGAAACAATGGCGAAGA  
GCAAAGCAGAGATTCAAAGGAGGAAAGAGACAACAGATATGAACGAAGAC  
TTCTTGAAAAGAGAAAGAGACATGAGGTGAGTAACCATGATAATAAATAATC  
AAGTAAGGGCTATAGATTTATAAATCTGGAGTTAACAGTTTCGAAAAAAG  
TAGTTTTTCATATGTGCGAAGGAATATCAAAAATAGGGGAATAGCCTAAACGA  
GTGAGAAAATTAATGTTTGTATTTTTTCAAAAATGTCTGCAGGGCCGTTAT  
CCTTTCAAATGCACTCTATCAACATAGATCATATCCATCATATCTTATCCAG  
AATTTATATCATATCCAAGATTGAGAGCGTTTCAAGGAAAATCTCAAACAAC  
CATACAATTTGTAGATCGACAACAAGGCCTCCACTTCTTCATCGATGGCCTC  
TGCAGCACCTGCACCACCAAGTTTGTATTTTTTCATATTAATAAAGTGAGCC

ACGCATAGTCGTTTTTAGGATTTTTGCCAGATCGATGTCGCGCAAACAGACTG  
TTTTTTTTCTTTGAAAGCCGTGCGTGACATGGGCCACGGATTGTAACGCCGC  
GCTGGATGGATAAAAATTTATTCAGTTTTTTAGCCTTTACAAAATATGGTTCG  
ACTACTTTCTTTATTTTTACATTTTTATAGGTGCTCATTGAGCTGAGATTTTT  
GGGTATAATCGGAAAATCGCTGATTTTGGTCATTTTTCTGCACTAAAGATTAC  
ACAAAAGTTCAGTATTTAGATTCATTGTTGAAAATTGGGGATGATCTACAG  
ATACATATCGCCGTGTTCAAAAACACACGTGACGTCGTGACTGGGAAAACCC  
TGCGTACCCAACTTAATCGCCTTGACGACATCCCCCTTTCGCCAGCTGGC  
GTAATAGCGAAGAGGCCCGCACCGATCGCCCTTCCCAACAGTTGCGCAGCCT  
GAATGGCGAATGGCGCCTGATGCGGTATTTCTCCTTACGCATCTGTGCGGTA  
TTTACACCCGCATATGGTGCCTCTCAGTACAATCTGCTCTGATGCCGCATAG  
TTAAGCCAGCCCCGACACCCGCCAACACCCGCTGACGCGCCCTGACGGGCTT  
GTCTGCTCCCGGCATCCGCTTACAGACAAGCTGTGACCGTCTCCGGGAGCTG  
CATGTGTCAGAGGTTTTACCGTCATCACCGAAACGCGCGAGACGAAAGGGC  
CTCGTGATACGCCATTTTTATAGGTTAATGTCATGATAATAATGGTTTCTTA  
GACGTCAGGTGGCACTTTTCGGGGAAATGTGCGCGGAACCCCTATTTGTTTAT  
TTTTCTAAATACATTCAAATATGTATCCGCTCATGAGACAATAACCCTGATAA  
ATGCTTCAATAATATTGAAAAGGAAGAGTATGAGTATTCAACATTTCCGTG  
TCGCCCTTATCCCTTTTTTTCGCGGCATTTTGCCTTCCCTGTTTTTGTCTACCCAG  
AAACGCTGGTGAAAGTAAAAGATGCTGAAGATCAGTTGGGTGCACGAGTGG  
GTTACATCGAACTGGATCTCAACAGCGGTAAGATCCTTGAGAGTTTTTCGCCCC  
GAAGAACGTTTTCCAATGATGAGCACTTTTAAAGTTCTGCTATGTGGCGCGGT  
ATTATCCCGTATTGACGCCGGGCAAGAGCAACTCGGTCCCGCATACTACTAT  
TCTCAGAATGACTTGGTTGAGTACTCACCGATCACAGAAAAGCATCTTACGG  
ATGGCATGACAGTAAGAGAATTATGCAGTGCTGCCATAACCATGAGTGATAA  
CACTGCGGCCAACTTACTTCTGACAACGATCGGAGGACCGAAGGAGCTAACC  
GCTTTTTTGCACAACATGGGGGATCATGTAACCTCGCCTTGATCGTTGGGAACC  
GGAGCTGAATGAAGCCATACCAAACGACGAGCGTGACACCACGATGCCTGT  
AGCAATGGCAACAACGTTGCGCAAACCTATTAACCTGGCGAACTACTTACTCTA  
GCTTCCCGGCAACAATTAATAGACTGGATGGAGGCGGATAAAGTTGCAGGAC  
CACTTCTGCGCTCGGCCCTTCCGGCTGGCTGGTTTATTGCTGATAAATCTGGA  
GCCGGTGAGCGTGGGTCTCGCGGTATCATTGCAGCACTGGGGCCAGATGGTA  
AGCCCTCCCGTATCGTAGTTATCTACACGACGGGGAGTCAGGCAACTATGGA  
TGAACGAAATAGACAGATCGCTGAGATAGGTGCCTCACTGATTAAGCATTGG  
TAACTGTCAGACCAAGTTTACTCATATATACTTTAGATTGATTTAAAACCTCA  
TTTTTAATTTAAAAGGATCTAGGTGAAGATCCTTTTTTGATAATCTCATGACCA  
AAATCCCTAACGTGAGTTTTTCGTTCCACTGAGCGTCAGACCCCGTAGAAAA  
GATCAAAGGATCTTCTTGAGATCCTTTTTTTCTGCGCGTAATCTGCTGCTTGCA  
AACAAAAAACCACCGCTACCAGCGGTGGTTTTGTTTGCCGGATCAAGAGCTA  
CCAACCTTTTTTCCGAAGGTAACCTGGCTTCAGCAGAGCGCAGATACCAAATA  
CTGTCCTTCTAGTGTAGCCGTAGTTAGGCCACCACTTCAAGAACTCTGTAGCA  
CCGCCTACATACCTCGCTCTGCTAATCCTGTTACCAGTGGCTGCTGCCAGTGG  
CGATAAGTCGTGTCTTACCGGGTTGGACTCAAGACGATAGTTACCGGATAAG  
GCGCAGCGGTCCGGGCTGAACGGGGGGTTCGTGCACACAGCCCAGCTTGGAGC  
GAACGACCTACACCGAACTGAGATACCTACAGCGTGAGCTATGAGAAAGCG  
CCACGCTTCCCGAAGGGAGAAAGGCGGACAGGTATCCGGTAAGCGGCAGGG

TCGGAACAGGAGAGCGCACGAGGGAGCTTCCAGGGGGAAACGCCTGGTATC  
TTTATAGTCCTGTCGGGTTTCGCCACCTCTGACTTGAGCGTCGATTTTTGTGAT  
GCTCGTCAGGGGGGCGGAGCCTATGGAAAAACGCCAGCAACGCGGCCTTTTT  
ACGGTTCCTGGTCTTTTGCTGGCCTTTTGCTCACATGTTCTTTCCTGCGTTATC  
CCCTGATTCTGTGGATAACCGTATTACCGCCTTTGAGTGAGCTGATAACCAGCG  
GATAACAATTCACAGGGCCCTGTCGGATTATGGGCTCTTCTTTTATCCTCTA  
CTTTCTTTCTAGAAAATGCAAATGTTGAGTCAGAAATTGCTGAATGGAGTACA  
ACTGCAATGGGTTTAGCTTATGTTTCTGGAACAATTACTGGTGGAATTGTGAT  
TGAAAAGTAAGGTTATATTTCAATTCATAAATGTTACCACAGTATAACAAA  
ACAAGTTACATTGTTCAAGATGTCTGAATGTATTATTATTGTATTTGT  
GCATCAGTACTGTAGTTGACTGAAGAAGGGTTTAAAATAATCTCAACGTTTT  
TAAGACGAGTTAGTGAGAATACGGTCGCAGTTAGGATGTTTGGACATAGTTT  
TATTAGATAATCGTGAACATACTACTATAAAAACCCGCTAACTCATTGAATA  
AGATAGTTTTAAACGTTCAAAAATTTGAAGACAAAATTGTATGAATAAGTTTA  
CAGAGTTGGTCGACGCAAGCTTCTCCTTCTCTTCACATTTCTCAATAATTTAG  
CTCTAATTGCATTCGTATTCTTCGCAAAAATACGTATTCTGATTGACCCGATG  
AAATACGGATGCCTAGTTGCATTGATCATCTACGGTTATACTTATGGGTGAGG  
TTTTTCAAATATAATTTGATTTAATCGAATAATGAAATTCAGAACTGGAGTT  
GGTCCAATTCGTGGTTTATATCCTCTGAACTGGTACCTCAAAAACATCGTAG  
TATTGCTCAATCTGTGGCATATTCAATGAATACTGTAATGGTGGTTATCAGTA  
CATTACAGTATTACCTCTATAATTCCGTTATTGGTAGTTATGCTTTCCTTATTC  
TATATTCAATTCCTTCATTTATAAGTATGCTTATATTATTTTCGCTACTTACCGG  
AAACCAAAGGACGAGAGATTCATGATATTGTGAATGAACTTAAAAAAAAAAT  
GAAAACCTTTGAAAACGTTACATACGGCCGAAATTTTACTTGATCGAGCCAATT  
GAACTTTTGTTAAGACTTACAGAAAAGTGAGAGATTTTGTACAAAAAAGTG  
AGAAAAAAGCGAAAATGAACAGGAAAAAGAAGAAAAATACACCCGAAGTA  
TCATATAAAAATTA AAAAAGATTGTTTGACCTGGCGGAACTTTTTTGCAAAAAC  
TCTGAATATCCATGGCACATGCTTCGTGCAAAAACAGGATCCAAATGAATATC  
ACAAGAGATTCTTGAAGACGACGAGCCACTTGCTCAGAGCATTGCTTATCT  
CGAATGAGACCCTTGTTAAAATCATTTTTCAAACATTATATGACATTGTGCGAA  
ATGTCCTCCTGATTCCATGATGGTAGCAAACACTCACTTCGTCTTTGAGCCAATT  
TATCCAAGTCCTTGTA AAAAAGTATTCGAAAATTGTTAACGGATAAAAATGTTTA  
TTATAATATCAAAAACAATTTGTCAGTTGACCACTTTTTGATATATTTGACAG  
AAACCGGGATGAATTGGCTCAAAGTTAGGGCGCCCTTCTATTACAGGGTTTCT  
GATAACAACCGGTTATTA ACTCCCAACAAGGGATGATTTCAATTCATCATG  
CTCAAATTGACCCAAATTAAGTTACATGACAAATTCATCGCCCTTTTCAACTC  
TTCTTGGCTCATCATCTGTTATTCTGTTCCATTCTGTCTGCACCCTATAACCC  
TTTGCACTCTCTCGTCATTCCTTTCTTGATAGTGTCTTCTTCTCCCAGCT  
CTGCTACTTCTATGACTTGCGCCCGCTGCTTTTTCCGCTCGTTCCTCTCCTCTCT  
GACGTCTTCTTCTGCTTCTTTTCTCCTTCTTTTTCCCTTCTCAATCTTCTCTTT  
TTCCCATTTCTGTCAATCATTGCAAGAAGAAGAAGAAGACCCTCATTCA  
TTTCATTTTTTTTTCTGTCGGTGTGTGCTGCTCGGTTAAGAGTGAGCTCTCTAT  
TCCACGTCTTCTTCTTTTTCTTCTTCGATTCGAATCAATCACTCCACCAAACG  
CATTGTTTTTTGGGATTCACCCCGCGGTTTCGCAATAGGTTTCTTTTTCAAATTA  
TTAGCGTTATAAATAGAAAAATGGTGGAGTTTCAATAAAAATGATAATTTAC  
AAAGTGTATTTTGATTACATGACTCAAAAAGGTTGAAATTTTTCATACCAGT

TTTCCGGAAATCCATCTGATATCATTATCGTATTTTTCTTTTTAAAAATGTTTT  
CAAAAAAAAAACAAAATATAGCTGGTTATTTGGCACCCCTCTAATTACCATTTTC  
CTGTCACACCACACTCTTTTCCTTCTTCCACTTCTTTCCGTTTTTCAGCCGCTTC  
CAACCAAACCGATATGAAAGCCGAGCAACAACAATCGATTCCACCCGGCTCG  
GCGACCTTCCCGTCGCAGGTGAGACTCAGAAACTAGAGAAACCGCTCAACT  
AACTCTTGATATCCGATTTCACTTTTTCTCTTTTTCTTTTTGTTGAACTTTTCCA  
TATTTCCAGATGCCACGGCCACCACCAAGCACCGAACAAGGAATCACAACGG  
AATCGGAGCTTGCGAAGAAAGCTCAAATCACTCCGAACGACGTTTTAGCACT  
TCCGGGAATCACTCAAGGTATCTTGCTCCCTTTGGATTTCAAGTTAAAACATA  
AATTTAGGATTCTTATGCTCCCCATCTGCGAACATCTATAACATCGAGTTCAC  
CAAGTTCCAAATCCGTGATCTGGACACTGAGCAAGTGCTTTTCGAGATCGCC  
AAACCGGAGAACGATCAGGAGAATGATGAGTCGCCACAGGAGTCGGCAAGA  
TACGTGCGTTATAGATTTGCTCCAAACTTTTTGAAACTCAAACGGTCGGAGC  
AACTGTGGAATTCAAAGTAGGAGACATCCCAATCCATCATTTCGAATGATC  
GAACGTCACTTCTTCAAAGATCGCCTTCTGAAGTGTTTTGACTTTGAATTCGG  
ATTCTGTATTCCGAATTCACGAAACAACACTGTGAACATATCTATGAGTTCCTC  
AACTCTCTCAACAACACTCAGTGAGTCATTATTCTAAAAAGTACAATTCAAAAG  
ACTAATCTTTTTTTCAGTGGACGACATGATCAACAATCCAAACGAGACTCGTT  
CTGACAGCTTCTATTTTCGTCGATAACAAACTCGTCATGCACAACAAGCCGA  
CTACTCATATGATGCATAAATATTTAATACAAAAATGTTCTGGATAAATTATC  
TGTCGAATAGAAAAAAAAACTCCAAATGTGATTAAATTCATAAATTCCTGTCT  
AGTTTGTTCCTTCCCCTTCCCCTTCTCATGTTCAATGCATTCCCTAAGCTTTTCA  
GTTCCCCCCTTGTTTCTATATTTTTTCGCTGTCCTGTCACACTCGCTAAAAACA  
CTAATCACACGGAAATCTGTTTTCAATAAAAACTCCAACCTTTAACTCATTTTC  
AATTTCAACTGAAAGATTTTTTCATTAGAGAATGTCTAGAAGTAGGCCCGGGC  
TACGTAATACGACTCACTTAAGGCCTTACTAGAGGGTACCAGAGCTCACCT  
AGGCAGGAACAGCTATGACCATGATTACGCCAAGCTATCAACTTT

*p5605-rpr-1p*:: tRNA<sup>Leu</sup><sub>CUA</sub>

GGGCCCTGTTCGGATTATGGGCTCTTCTTTTTATCCTCTACTTTCTTTCTAGAAAA  
TGCAAATGTTGAGTCAGAAATTGCTGAATGGAGTACAACCTGCAATGGGTTTA  
GCTTATGTTTCTGGAACAATACTGGTGGAAATTGTGATTGAAAAGTAAGGTTA  
TATTTCAATTCATAAATGTTACCACAGTATAACAAAAACAAGTTACATTGTT  
CAGAGTATGTCTGAATGTATTATTATTGTATTTGTGCATCAGTACTGTAG  
TTGTACTGAAGAAGGGTTTAAAATAATCTCAACGTTTTTAAGACGAGTTAGTG  
AGAATACGGTTCGCAGTTAGGATGTTTGGACATAGTTTTATTAGATAATCGTGA  
ACTAACTCACTATAAAAACCCGCTAACTCATTGAATAAGATAGTTTTAAACGT  
TCAAATTTGAAGACAAAATTGTATGAATAAGTTTACAGAGTTGGTCGACGC  
AAGCTTCTCCTTCTTTCACATTTCTCAATAATTTAGCTCTAATTGCATTTCGTA  
TTCTTCGCAAAAATACGTATTCTGATTGACCCGATGAAATACGGATGCCTAGT  
TGCATTGATCATCTACGGTTATACTTATGGGTGAGGTTTTTCAAATATAATTTG  
ATTTAATCGAATAATGAAATTTCAGAAGTGGAGTTGGTCCAATTTTCGTGGTTT  
ATATCCTCTGAACTGGTACCTCAAAAACATCGTAGTATTGCTCAATCTGTGGC  
ATATTCATGAATACTGTAATGGTGGTTATCAGTACATTTACAGTATTACCTC

TATATCCGTTATTGGTAGTTATGCTTTCCTTATTCTATATTCAATTCCTTCATT  
TATAAGTATGCTTATATTATTTTCGCTACTTACCGGAAACCAAAGGACGAGAG  
ATTCATGATATTGTGAATGAACTTAAAAAAAATGAAAACCTTTGAAAACGT  
TCATACGGCCGAAATTTTACTTGATCGAGCCAATTGAACTTTTGTAAAGACTT  
ACAGAAAAGTGAGAGATTTTGTACAAAAAAGTGAGAAAAAAGCGAAAATG  
AACAGGAAAAAGAAGAAAAATACACCCGAAGTATCATATAAAAATTA  
GATTGTTTGACCTGGCGGAACTTTTTTGCAAAAACCTCTGAATATCCATGGCAC  
ATGCTTCGTGCAAAACAGGATCCAAATGAATATCAACAAGAGATTCTTGAAG  
ACGACGAGCCACTTGCTCAGAGCATTGCTTATCTCGAATGAGACCCTTGTTAA  
AATCATTTTTCAAACATTATATGACATTGTGCGAAATGTCCTCCTGATTCCATG  
ATGGTAGCAAACCTCACTTCGTCTTTGAGCCAATTTATCCAAGTCCTTGTA  
AGTATTGCGAAAATTGTTAACGGATAAAATGTTTATTATAATATCAAAAACAA  
TTTGTGAGTTGACCACTTTTTGATATATTTGACAGAAACCGGGATGAATTGGC  
TCAAAGTTAGGGCGCCCTTCTATTACAGGGTTTCTGATAACAAACCGGTTATT  
AACTCCCAACAAGGGATGATTTCAATTCATCATGCTCAAATTGACCCAAATTA  
AGTTACATGACAAATTCATCGCCCTTTTCAACTCTTCTTGGCTCATCATCTGTT  
ATTCTGTTCCATTCTGTCTGCACCCTATACCCCTTTGCATACTCTCTCGTCAT  
TCCTTTCTTGGATAGTGTCTTCTTCTCCCCAGCTCTGCTACTTCTATGACTTGC  
GCCCCGTGCTTTTCCGCTCGTTCCTCTCCTCTCTGACGTCTTCTTCTGCTTCTTT  
TCTCCTTCTTTTTTCCCTTCTCAATCTTCTCTTTTTTCCCATTTCTGTCAATCAT  
TCGAAGAAGAAGAAGAAGACCCTCATTTCATTTTTTTTTTCTGTGCGG  
TGTGTGCTGCTCGGTTAAGAGTGAGCTCTCTATCCACGTCTTCTTCTTTTTCT  
TCTTCGATTGCAATCAATCACTCCACCAAAACGCATTCGTTTTTGGGATTCAC  
CCCGCGGTTGCAACAGGTTTCTTTTTCAAATTATTAGCGTTATAAATAGAAA  
AATGGTGGAGTTTCAATAAAAATGATAATTTACAAAGTGATTTTGATTACAT  
GACTCAAAAAGGTTGAAATTTTTCATACCAGTTTTCCGGAAATCCATCTGAT  
ATCATTATCGTATTTTTCTTTTTAAAAATGTTTTCAAAAAAAAACAAAATATA  
GCTGGTTATTTGGCACCCCTCTAATTACCATTTTCTCTGTCACACCACACTCTTTT  
CCTTCTTCCACTTCTTTCGTTTTTCAGCCGCTTCCAACCAACCGGATATGAAA  
GCCGAGCAACAACAATCGATTCCACCCGGCTCGGCGACCTTCCCGTCGCAGG  
TGAGACTCAGAAAACCTAGAGAAACCGCTCAACTAACTCTTGATATCCGATTT  
CATTCTTTTCTCTTTTCTTTTTGTGAACTTTTCCATATTTCCAGATGCCACGGC  
CACCACCAAGCACCGAACAAGGAATCACAACGGAATCGGAGCTTGCGAAGA  
AAGCTCAAATCACTCCGAACGACGTTTTAGCACTTCCGGGAATCACTCAAGG  
TATCTTGCTCCCTTTGGATTTAGTTTTAAACATAAATTTAGGATTCTTATGCT  
CCCCATCTGCGAACATCTATAACATCGAGTTCACCAAGTTCCAAATCCGTGAT  
CTGGACACTGAGCAAGTGCTTTTCGAGATCGCCAAACCGGAGAACGATCAGG  
AGAATGATGAGTCGCCACAGGAGTCGGCAAGATACGTGCGTTATAGATTTGC  
TCCAACTTTTTGAACTCAAACCGGTCGGAGCAACTGTGGAATTCAAAGTA  
GGAGACATCCCAATCCATCATTTCCGAATGATCGAACGTCCTTCTTCAAAGA  
TCGCCTTCTGAAGTGTTTTGACTTTGAATTCGGATTCTGTATTCCGAATTCACG  
AAACAACCTGTGAACATATCTATGAGTTCCTCAACTCTCTCAACAACCTCAGTG  
AGTCATTATTCTAAAAAGTACAATTCAAAGACTAATCTCTTTTTTTCAGTGGAC  
GACATGATCAACAATCCAAACGAGACTCGTTCTGACAGCTTCTATTTTCGTGCGA  
TAACAACCTCGTCATGCACAACAAAGCCGACTACTCATATGATGCATAAATA  
TTAATACAAAAATGTTCTGGATAATTATTCTGTGCAATAGAAAAAAAACCTCC

AAATGTGATTA AATTCCAATAATTCCTGTCTAGTTTGTTCCCTTCCCCTTCCCCT  
TCTCATGTTCAATGCATTCCCTAAGCTTTTCAGTTCCCCCTTGTTTCTATATTTT  
TTCGCTGTCCTGTCACACTCGCTAAAAACACTAATCACACGGAAATCTGTTTT  
CAATAAAAACTCCAAC TTTAACTCATT TTTCAATTTCAACTGAAAGATTTTTTC  
ATTAGAGAATGTCTAGAACTAGGCCCGGGCTACGTAATACGACTCACTTAAG  
GCCTTGACTAGAGGGTACCAGAGCTCACCTAGGTATCTAGAACCGGTGACGT  
CACCATGGGAAGCTTCGTGGATCCAGATATCCTGCAGGAATTCCTCGAGCCA  
TGGGGCTCAGCCTCAACCAATTTTTAGTGTTAAAAATTTGATTTTTTTCAGTTA  
AAAACGATGGTTTTTTGATGCTTTTTACCTATTTTACAGATAGAAAATTTTAAA  
TTTCGCAAAAATCTTTAAAAATAAACTTTTTTGT TTTGGTTTTCGCTCGAAAAT  
AGCTTTAAATTTGCAGTTTTTCTCTCAAAAAC TCTAAATTTTCATGCGTTCCACG  
TGGCTTTCTATCAATTTAAATACTAATATTAATATTTTCTTCAA AATCTGCCAC  
GTTACAGCCTGCCATAGCCTTCTGAACTCTACAATTCCCCTCTAATCACTAG  
CGCCGCTCCCCGCACACTCAACACAGCGAGCGGCGGAACCCGCGGGGTGTC  
GGCCGCTCGGACACGCTCCCGTATATAACGACGCGGCGCGGTGGATCCCCG  
CCCGGATGGTGGAAATCGGTAGACACAAGGGATTCTAAATCCCTCGGCGTTTCG  
CGCTGTGCGGGTTCAAGTCCCGCTCCGGGTATATCTTTTTGAATTTACAGCAT  
TTTTCATACTAGTGAGTCGTATTATAAGTGCAAGTAAGATCAGTGTTTGTTC  
GATATCAGTCTGTTTCGTAACGGTCTTCTGTATAACTACAAAAAGAATAAA  
AAACCGTATCACA ACTGAGAAAAAAGACAAA ACTTATTGAACAGTGTTCCCTT  
TCAAAAAATTATTTTGTA AAAAATCGAGTTTTTCTCAA AATAACGCACGCAA  
TCAAAAAACAAGAAA ACTAACGTGTTCTCCTGGGCGTGGA ACTCCTTATCAAG  
ATTACCATTATTGTCTGTCAGAATTGATATTTCAATTATTT CATATCTAGACAA  
ACCCGGGTGTCTTGCATTTATTAGTACTGTGAGTTTACATACAAACGAGGCTT  
ACTCAGATAACATAGAGTCACCTCTAATTAGCAAAAACCCATTTCTAATTAGC  
TATTTTCGACCAGTTCTAAAGTCACCGTAATTAGAAATGGTTTTTGTAGCTTTT  
CTAATTAGAAATGACCCCGAGATAAGTGAAATATGGCATT TTTCTGGGTTTTCT  
AGTAAGAAATGATCCCGCACGTAGTGATTCCGCGTTACAAGCCAAATTCAA  
TTAAAAAAGTATATTACACAATTCAAGTTACATTATTTTCAGGAAACAATGGC  
GAAGAGCAAAGCAGAGATTCAA AAGGAGGAAAGAGACAACAGATATGAAC  
GAAGACTTCTTGAAAAGAGAAAAGAGACATGAGGTGAGTAACCATGATAATA  
ATAATCAAGTAAGGGCTATAGATTTATAAATTCTGGAGTTAACAGTTTCGA  
AAAAAAGTAGTTTTTCATATGTGCGAAGGAATATCAAAAATAGGGGAATAGCC  
TAAACGAGTGAGAAAATTA AATGTTTTGTTATTTTTTCAA AATGTCTGCAGGG  
CCGTTATCCTTTCAAATGCACTCTATCAAACATAGATCATATCCATCATATCT  
TATCCAGAATTTATATCATATCCAAGATTGAGAGCGTTTCAAGGAAAATCTCA  
ACAACCATACAATTTTGTAGATCGACAACAAGGCCTCCACTTCTTCATCGAT  
GGCTCTGCAGCACCTGCACCACCAAGTTTGTATTTTTTCATATTAATAAAG  
TGAGCCACGCATAGTCGTTTTTAGGATTTTTTGCCAGATCGATGTCGCGCAAAC  
AGACTGTTTTTTTTCTTTGAAAGCCGTGCGTGACATGGGCCACG GATTGTAA  
CGCCGCGCTGGATGGATAAAAATTTATT CAGTTTTTTAGCCTTTACAAAATAT  
GGTTCGACTACTTTCTTTATTTTTACATTTTTATAGGTGCTCATTGAGCTGAGA  
TATTTTGGGTATAATCGGAAAATCGCTGATTTTGGTCATTTTTCTGCACTAAA  
GATTACACAAAAAGTT CAGTATTTAGATTCATTGTTGAAAATTGGGGATGATC  
TACAGATACATATCGCCGTGTTCAA AACACACGCTGCTGGCGTTACCCA ACT  
AATCGCCTTGCAGCACATCCCCCTTTCGCCAGCTGGCGTAATAGCGAAGAGG

CCCGCACCGATCGCCCTTCCCAACAGTTGCGCAGCCTGAATGGCGAATGGCG  
CCTGATGCGGTATTTTCTCCTTACGCATCTGTGCGGTATTTACACCGCATAT  
GGTGCCTCTCAGTACAATCTGCTCTGATGCCGCATAGTTAAGCCAGCCCCG  
ACACCCGCCAACACCCGCTGACGCGCCCTGACGGGCTTGTCTGCTCCCGGCA  
TCCGCTTACAGACAAGCTGTGACCGTCTCCGGGAGCTGCATGTGTCAGAGGT  
TTTACCGTCATCACCGAAACGCGCGAGACGAAAGGGCCTCGTGATACGCCT  
ATTTTTATAGGTTAATGTCATGATAATAATGGTTTCTTAGACGTCAGGTGGCA  
CTTTTCGGGGAAATGTGCGCGGAACCCCTATTTGTTTATTTTTCTAAATACATT  
CAAATATGTATCCGCTCATGAGACAATAACCCTGATAAATGCTTCAATAATAT  
TGAAAAGGAAGAGTATGAGTATTCAACATTTCCGTGTCGCCCTTATTCCCTT  
TTTTGCGGCATTTTGCCTTCTGTTTTTGTCTACCCAGAAACGCTGGTGAAAG  
TAAAAGATGCTGAAGATCAGTTGGGTGCACGAGTGGGTACATCGAACTGGA  
TCTCAACAGCGGTAAGATCCTTGAGAGTTTTCGCCCCGAAGAACGTTTTCAA  
TGATGAGCACTTTTAAAGTTCTGCTATGTGGCGCGGTATTATCCCGTATTGAC  
GCCGGGCAAGAGCAACTCGGTGCGCGCATACTACTATTCTCAGAATGACTTGG  
TTGAGTACTCACCAGTCACAGAAAAGCATCTTACGGATGGCATGACAGTAAG  
AGAATTATGCAGTGCTGCCATAACCATGAGTGATAAACTGCGGCCAACTTA  
CTTCTGACAACGATCGGAGGACCGAAGGAGCTAACCGCTTTTTTGCACAACA  
TGGGGGATCATGTAACCTGCCTTGATCGTTGGGAACCGGAGCTGAATGAAGC  
CATAACAAACGACGAGCGTGACACCACGATGCCTGTAGCAATGGCAACAAC  
GTTGCGCAAATACTGACTGCGGAACTACTTACTCTAGCTTCCCGGCAACAAT  
TAATAGACTGGATGGAGGCGGATAAAGTTGCAGGACCACTTCTGCGCTCGGC  
CCTTCCGGCTGGCTGGTTTATTGCTGATAAATCTGGAGCCGGTGAGCGTGGGT  
CTCGCGGTATCATTGCAGCACTGGGGCCAGATGGTAAGCCCTCCCGTATCGT  
AGTTATCTACACGACGGGGAGTCAGGCAACTATGGATGAACGAAATAGACA  
GATCGCTGAGATAGGTGCCTCACTGATTAAGCATTGGTAACCTGTCAGACCAA  
GTTTACTCATATATACTTTAGATTGATTTAAAACCTTCATTTTTAATTTAAAAGG  
ATCTAGGTGAAGATCCTTTTTGATAATCTCATGACCAAAAATCCCTAACGTGA  
GTTTTCGTTCCACTGAGCGTCAGACCCCGTAGAAAAGATCAAAGGATCTTCTT  
GAGATCCTTTTTTTCTGCGCGTAATCTGCTGCTTGCAAACAAAAAACCACCG  
CTACCAGCGGTGGTTTTGTTTCCGGATCAAGAGCTACCAACTCTTTTTCCGAA  
GGTAACCTGGCTTCAGCAGAGCGCAGATACCAAATACTGTCCTTCTAGTGTAG  
CCGTAGTTAGGCCACCACTTCAAGAACTCTGTAGCACCGCCTACATACTCGC  
TCTGCTAATCCTGTTACCAGTGGCTGCTGCCAGTGGCGATAAGTCGTGTCTTA  
CCGGGTGGACTCAAGACGATAGTTACCGGATAAGGCGCAGCGGTCCGGGCTG  
AACGGGGGGTTCGTGCACACAGCCAGCTTGGAGCGAACGACCTACACCGA  
ACTGAGATACCTACAGCGTGAGCTATGAGAAAGCGCCACGCTTCCCGAAGGG  
AGAAAGGCGGACAGGTATCCGGTAAGCGGCAGGGTCGGAACAGGAGAGCGC  
ACGAGGGAGCTTCCAGGGGGAAACGCCTGGTATCTTTATAGTCCTGTCCGGT  
TTCGCCACCTCTGACTTGAGCGTCGATTTTTGTGATGCTCGTCAGGGGGGCGG  
AGCCTATGGAACAAACGCCAGCAACGCGGCCTTTTTACGGTTCCTGGTCTTTT  
CTGGCCTTTTGTCTACATGTTCTTTCCTGCGTTATCCCCTGATTCTGTGGATAA  
CCGTATTACCGCCTTTGAGTGAGCTGATACCAGCGGATAACAATTTACA

*p10882-unc-54p::LeuRS*

GTATAGAAAAGTTGCTGAGGGACTTCCAGCTGTCTGCGAGCCAGTCCAAAAG  
GGAGAGCCAGGATCCACCGGAGAGCCAGGACCAGTCGGACCACCAGGACCA  
TCCGGACAACCAGGAAACGACGGAACCCAGGTAATCATTTCATAGTTTTTC  
AATCCATATCTAATCACCATCTTTTCAGGACAACCTGGACCAAAGGGACCA  
CCAGGACCAGACGGCAAGCCAGGAGCCGACGGAAACCCAGGACAGCCAGGA  
CCAGTCGGACCACCAGGAACCCAGGAGAGCGTGGAATCTGTCCAAAGTACT  
GCGCCATCGATGGAGGAATCTTCTTCGAGGACGGAACTCGCCGCTAAGCGGA  
TCGCCTTTAATTTATTCTTTGCCTTATGCGTTGCTCAAAAATAAAACATTATTTT  
ATCCAAAATAATTTTTGAGGTTTTAGATGAATTTGATAGTTTAGCTTGTAC  
TTTCTCCTGTGCGAAGAACTTGCTAAGCAGGTAAGCAGCATCCTTATCAAGT  
TTCGACCTTATCTCTCAGTAGTCGCATACGTCGTATCCCTCATCTGCTTTGTTT  
TAGCCACTTCAAGGGAATTCAGATCACTTTTTCTCATGTGTTTTCAAATTTACT  
TTTGTGGAGTGACCTTAATTGACCCTCTCGTCATAAGTGGACGGTGGGTAGTT  
ACTTAACAAATTTTCGAGTACAGGATAGTGTCAATGGCATGAGACATGTAGTA  
GCCAAGCAATTATGGCGAATAAGTTTTCAAAAACCAACATTCTGTCAAATACA  
AAGACCTGCAACATTAGAGAATTCATTAATAACATCTTCGAGGAAATCAAAT  
TTTCCCGTAGACGATCCCGTAGACCTACTTGTACAATATGTTCTAGATATACA  
CTCCGAACTTAAAATATCTCGAACATTTGTGTTGAATATTTATTTAATTCTAG  
GTTTTTCAAATTCGCACGATTTTTGCCATACTACTGCCCAATAGTTTACATTT  
ATTGGGCCTGGATCTGTAAGGCACTTTTGGGAGCTCCCTTTCTTTTCCTTCAA  
ATTACCCATACAGATCTATAAATCACAATTTAATAACAAGATTTTATTCAAGTT  
AAAAACATAAAAGGGGGCTTTGCGGTGGTCCCCATTTACCAGAGAACTATAA  
AAAATATAAATTTAACATCAAATGTTGCAATTGATTCCCTCTCAAAGCTGCTT  
GAAGAACCCTGATTCTGTCAAGCCTATGAAGATTTAAAAAAAATTGGGAAGA  
CCCTTAGTTCCAAACAAGTGTGTCGTTGACCCAGTAGGCGATATTCTGAAAAGTC  
ATAAAATGGGGTTGCTAAAAAATTGGTCGCTAACTTACATTTAGCTAGGAAT  
GTTAATTGGAATAACTCATAATTTACAGTAAAATTATCAAAAAATAGCAAAA  
ATCAATAGAGGACCGCTACACAGGCATCCAACAGTACGAGTTCTGCGTTTTT  
GAATTGCAAGTTTGTACAAAAAGCAGGCTCTTTGAGCCAATTTATCCAAGT  
CCTTGTA AAAAGTATTCGAAAATTGTTAACGGATAAAAATGTTTATTATAATAT  
CAAAAACAATTTGTCAGTTGACCACTTTTTGATATATTTGACAGAAACCGGGA  
TGAATTGGCTCAAAGTTAGGGCGCCCTTCTATTACAGGGTTTCTGATAACAAA  
CCGGTTATTA ACTCCCAACAAGGGATGATTTCAATTCATCATGCTCAAATTGA  
CCCAAATTAAGTTACATGACAAATTCATCGCCCTTTTCAACTCTTCTTGGCTC  
ATCATCTGTTATTCTGTTCCCTATTCTGTCTGCACCCTATACCCCTTTCGATACT  
CTCTCGTCATTCCTTTCTTGGATAGTGTCTTCTTCTCCCCAGCTCTGCTACTTCT  
ATGACTTGCGCCCGCTGCTTTTCCGCTCGTTCCTCTCCTCTCTGACGTCTTCTT  
CTGCTTCTTTTCTCCTTCCCTTTTCCCTTCTCAATCTTCCCTTTTTTCCCATTCT  
GTCAATCATTCGAAGAAGAAGAAGAAGACCCCTCATTCAATTTCAATTTTTTT  
TTCTGTGCGGTGTGTGCTGCTCGGTTAAGAGTGAGCTCTCTATTCCACGTCTTCT  
TCTTTTTCTTCTTCGATTCGAATCAATCACTCCACCAAAAACGCATTCGTTTTTG  
GGATTCACCCCGCGGTTGCAACAGGTTTTCTTTTTCAAATTATTAGCGTTATA  
AATAGAAAAATGGTGGAGTTTCAATAAAAATGATAATTTACAAAGTGTATTT  
TGATTACATGTA CTCAAAAAGGTTGAAATTTTTCATACCAGTTTTCCGGAAAT  
CCATCTGATATCATTATCGTATTTTTCTTTTTAAAAATGTTTTCAAAAAAAAAC  
AAAATATAGCTGGTTATTTGGCACCCCTCTAATTACCATTTTCTGTACACCA



CACTCTTTTCCTTCTTCCACTTCTTTCCGTTTTTCAGCCGCTTCCAACCAAACCG  
ATATGAAAGCCGAGCAACAACAATCGATTCCACCCGGCTCGGCGACCTTCCC  
GTCGCAGGTGAGACTCAGAAAAGTACAGAAACCGCTCAACTAACTCTTGATA  
TCCGATTTTATTCTTTTCTTTTTCTTTTTGTTGAACTTTTCCATATTTCCAGAT  
GCCACGGCCACCACCAAGCACCGAACAAGGAATCACAACGGAATCGGAGCT  
TGCGAAGAAAGCTCAAATCACTCCGAACGACGTTTTAGCACTTCCGGGAATC  
ACTCAAGGTATCTTGCTCCCTTTGGATTTTCAGTTTAAAACATAAAATTTAGGAT  
TCTTATGCTCCCCATCTGCGAACATCTATAACATCGAGTTCACCAAGTTCCAA  
ATCCGTGATCTGGACACTGAGCAAGTGCTTTTTCGAGATCGCCAAACCGGAGA  
ACGATCAGGAGAATGATGAGTCGCCACAGGAGTCGGCAAGATACGTGCGTTA  
TAGATTTGCTCCAACTTTTTGAACTCAAAACGGTCGGAGCAACTGTGGAA  
TTCAAAGTAGGAGACATCCCAATCCATCATTCCGAATGATCGAACGTCACTT  
CTTCAAAGATCGCCTTCTGAAGTGTTTTGACTTTGAATTTCGGATTCTGTATTCC  
GAATTCACGAAACAACACTGTGAACATATCTATGAGTTCCTCAACTCTCTCAAC  
AACTCAGTGAGTCATTATTCTAAAAAGTACAATTCAAAGACTAATCTCTTTT  
TCAGTGGACGACATGATCAACAATCCAAACGAGACTCGTTCTGACAGCTTCT  
ATTTTCGTCGATAACAAACTCGTCATGCACAACAAAGCCGACTACTCATATGA  
TGCATAAATATTTAATACAAAAATGTTCTGGATAATTATTCTGTGCAATAGAA  
AAAAAACTCCAAATGTGATTAATTTCCAATAATTCCTGTCTAGTTTGTTCCTT  
CCCCTTCCCCTTCTCATGTTCAATGCATTCCTAAGCTTTTCAGTTCCCCCCTTG  
TTTCTATATTTTTTCGCTGTCCTGTCACACTCGCTAAAAACACTAATCACACG  
GAAATCTGTTTTCAATAAAAACTCCAACTTAACTCATTTCATTTCAACTG  
AAAGATTTTTTCATTAGAGAATGTCTAGAACTAGGCCCGGGCTACGTAATAC  
GACTCACTTAAGGCCTTGACTAGAGGGTACCAGAGCTCACCTAGGTATCTAG  
AACCGGTGACGTCACCATGGGAAGCTTCGTGGATCCAGATATCCTGCAGGAA  
TTCGTCTTCTTCTAAATTTCCATAAAAATCCCGAAACTCCTTCCCTCTATCTTCT  
TTTTCTTCTCGTTTTTCAAATGTTTCTCTCTATCCCATTCTCTCATCAATTGAGTG  
GGATGAGGCTATCTCTGCCTCTTCTGAATCTCTGAACCATCTTACATTACA  
CTGTGGATGACGAGCCCCACAGGCTCCCTTGCATCAGATACTGCCATTGGGG  
ATGGCAAAGAAGAGAGAAGGTATTGTGAGGATATATTTTTCTAAGAAAAAAC  
GTTTGAAGAAAAGAAGATGAAGAAGATCTGCTTGATTCAATGCACAAGTTAG  
AAGTAACAGGGGTCTATATTTTCGAAGAACTTAAAGGGAATGCAACTGAACAT  
AAAATTAACAAAGGGATTGAATCCTGCAGTGAGTATTTTCGGTTTTTCACTG  
GTTCTCTGTAAAAAGAGTAATGCAAAGGGCAAGTTAACTTAGGTTCGTAAATG  
TATTGAATTTGCTTAAAATCTGAAGATCTAGTGGTGAACCGTGAAGATTATC  
AAGAGGAGGCTGAAGATCTGTTTAAAGAACCATTAATCAAACCTGGTATTCTAT  
TTTCACTGGTTGTATGTAAACATTCTATCTTATTCCTTTTATCACTGTTCTGCA  
CTTTCCTATAAAAAAAGTTGACCGACCGTACTCTCTGAATTCATTTTTCCCGA  
TCTTACCAACTCCCGATCTATCTCTATCCCTGGTTTTTTCTTCGTGCTCCAATG  
GAATTCCTTGAGACTTCCACTATCTTCTCTGGCACCTCCACTACGCGTAGGGC  
TCTCTCGCTTCGTGTATTCCCGGGAAGCCGGTTCCCGTCTCTCCCGCCGCTGC  
CGCTGCCGCACACAGCTTTACACCTCGTAGAATCCCCAAAGAGGGGCGTGCC  
TTGCGGGTGCCAACATCCTCCTGCCGAGGAAGAAGCAGGCACTCATCACTCG  
CATCATCAACCTCGGGATTGGCCAAAGGACCCAAAGGTATGTTTCGAATGAT  
ACTAACATAACATAGAACATTTTCAGGAGGACCCTTGGCTAGCGGTAGAAAA  
AATGCAAGAGCAATACCGCCCGGAAGAGATAGAATCCAAAGTACAGCTTCAT

TGGGATGAGAAGCGCACATTTGAAGTAACCGAAGACGAGAGCAAAGAGAAG  
TATTACTGCCTGTCTATGCTTCCCTATCCTTCTGGTCGACTACACATGGGCCAC  
GTACGTAACACTACCCATCGGTGACGTGATCGCCGCTACCAGCGTATGCTGG  
GCAAAAACGTCCTGCAGCCGATCGGCTGGGACGCGTTTGGTCTGCCTGCGGA  
AGGCGCGGCGGTGAAAAACAACCCGCTCCGGCACCGTGGACGTACGACAA  
CATCGCGTATATGAAAAACCAGCTCAAAATGCTGGGCTTTGGTTATGACTGG  
AGCCGCGAGCTGGCAACCTGTACGCCGGAATACTACCGTTGGGAACAGAAAT  
TCTTCACCGAGCTGTATAAAAAAGGCCTGGTATATAAGAAGACTTCTGCGGT  
CAACTGGTGCCCGAACGACCAGACCGTACTGGCGAACGAACAAGTTATCGAC  
GGCTGCTGCTGGCGCTGCGATACCAAAGTTGAACGTAAAGAGATCCCGCAGT  
GGTTTATCAAATCACTGCTTACGCTGACGAGCTGCTCAACGATCTGGATAA  
ACTGGATCACTGGCCAGACACCGTTAAAACCATGCAGCGTAACTGGATCGGT  
CGTTCCGAAGGCGTGGAGATCACCTTCAACGTTAACGACTATGACAACACGC  
TGACCGTTTACACTACCCGCCCGGACACCTTTATGGGTTGTACCTACCTGGCG  
GTAGCTGCGGGTCATCCGCTGGCGCAGAAAGCGGCGGAAAATAATCCTGAAC  
TGCGGCTTTATTGACGAATGCCGTAACACCAAAGTTGCCGAAGCTGAAAT  
GGCGACGATGGAGAAAAAAGGCGTCGATACTGGCTTTAAAGCGGTTACCCA  
TTAACGGGCGAAGAAATCCCGTTTGGGCAGCAAACCTTCGTATTGATGGAGT  
ACGGCACGGGCGCAGTTATGGCGGTACCGGGGCACGACCAGCGCGACTACG  
AGTTTGCCTCTAAATACGGCCTGAACATCAAACCGGTTATCCTGGCAGCTGAC  
GGCTCTGAGCCAGATCTTTCTCAGCAAGCCCTGACTGAAAAAGGCGTGCTGT  
TCAACTCTGGCGAGTTCAACGGTCTTGACCATGAAGCGGCCTTCAACGCCAT  
CGCCGATAAACTGACTGCGATGGGCGTTGGCGAGCGTAAAGTGAACACTACCGC  
CTGCGCGACTGGGGTGTTTCCCGTCAGCGTACTGGGGCGCGCCGATTCCGAT  
GGTGACGCTGGAAGACGGTACCGTAATGCCGACCCCGGACGACCAGCTGCCG  
GTGATCCTGCCGAAGATGTGGTAATGGACGGCATTACCAGCCCGATTAAG  
CAGATCCGGAGTGGGCGAAAACACTACCGTTAACGGTATGCCAGCACTGCGTGA  
AACCGACACTTTCGACACCTTTATGGAGTCCTCCTGGTACTATGCGCGCTACA  
CTTGCCCGCAGTACAAAGAAGGTATGCTGGATTCCGAAGCGGCTAACTACTG  
GCTGCCGGTGGATATCTACATTGGTGGTATTGAACACGCCATTATGCACCTGC  
TCTACTTCCGCTTCTTCCACAACTGATGCGTGATGCAGGCATGGTGAACCTCT  
GACGAACCAGCGAAACAGTTGCTGTGTCAGGGTATGGTGCTGGCAGATGCCT  
TCTACTATGTTGGCGAAAACGGCGAACGTAACCTGGGTTTCCCGGTTGATGCT  
ATCGTTGAACGTGACGAGAAAGGCCGTATCGTGAAAGCGAAAGATGCGGCA  
GGCCATGAACTGGTTTATAACCGGCATGAGCAAAATGTCCAAGTCGAAGAACA  
ACGGTATCGACCCGCAGGTGATGGTTGAACGTTACGGCGCGGACACCGTTTCG  
TCTGTTTATGATGTTTGCTTCTCCGGCTGATATGACTCTCGAATGGCAGGAAT  
CCGGTGTGGAAGGGGCTAACCGCTTCCCTGAAACGTGTCTGGAACTGGTTTA  
CGAGCACACAGCAAAGGTGATGTTGCGGCACTGAACGTTGATGCGCTGACT  
GAAAATCAGAAAGCGCTGCGTCGCGATGTGCATAAAACGATCGCTAAAGTGA  
CCGATGATATCGGCCGTCGTCAGACCTTCAACACCGCAATTGCGGGCATTAT  
GGAGCTGATGAACAACTGGCGAAAGCACCAACCGATGGCGAGCAGGATCG  
CGCTCTGATGCAGGAAGCACTGCTGGCCGTTGTCCGTATGCTTAACCCGTTCA  
CCCCGCACATCTGCTTACGCTGTGGCAGGAACTGAAAGGCGAAGGCGATAT  
CGACAACGCGCCGTGGCCGGTTGCTGACGAAAAAGCGATGGTGGAAAGACTC  
CACGCTGGTTCGTGGTGCAGGTTAACGGTAAAGTCCGTGCCAAAATCACCGTT

CCGGTGGACGCAACGGAAGAACAGGTTTCGCGAACGTGCTGGCCAGGAACAT  
CTGGTAGCAAAATATCTTGATGGCGTTACTGTACGTAAAGTGATTTACGTACC  
AGGTAAACTCCTCAATCTGGTCGTTGGCTAAGAGCTCCGCATCGGCCGCTGTC  
ATCAGATCGCCATCTCGCGCCCGTGCCCTCTGACTTCTAAGTCCAATTACTCTT  
CAACATCCCTACATGCTCTTTCTCCCTGTGCTCCCACCCCTATTTTTGTTATT  
ATCAAAAACCTTCTCTTAATTTCTTTGTTTTTTAGCTTCTTTTAAGTCACCTCT  
AACAATGAAATTGTGTAGATTCAAAAATAGAATTAATTCGTAATAAAAAGTC  
GAAAAAAATTGTGCTCCCTCCCCCATTAATAATAATTCTATCCCAAAATCTA  
CACAATGTTCTGTGTACACTTCTTATGTTTTTTACTTCTGATAAATTTTTTTGA  
AACATCATAGAAAAACCGCACACAAAATACCTTATCATATGTTACGTTTCA  
GTTTATGACCGCAATTTTTATTTCTTCGCACGTCTGGGCCTCTCATGACGTCAA  
ATCATGCTCATCGTGAAAAAGTTTTGGAGTATTTTTGGAATTTTTCAATCAAG  
TGAAAGTTTATGAAATTAATTTTCTGCTTTTTGCTTTTTGGGGTTTCCCCTATT  
GTTTGTCAAGATTTTCGAGGACGGCGTTTTTTCTTGCTAAAATCACAAGTATTGA  
TGAGCACGATGCAAGAAAGATCGGAAGAAGGTTTGGGTTTGAGGCTCAGTGG  
AAGGTGAGTAGAAGTTGATAATTTGAAAGTGGAGTAGTGTCTATGGGGTTTT  
TGCCTTAAATGACAGAATACATTCCCAATATACCAAACATAACTGTTTAAAT  
TAAACATTTTTCTAAATTTTATATGATTTCTTTTAAATTTGCAAAAATTACTTA  
AATTTGAATTCGCGCAAATGAGTGACTTCATTTTCTGCATTATTGTGTTTTC  
CGGCTATATTAATAGGTATTTGTTTGTGTTTTTTCTTTATTTTATGATTCGAACT  
CCAATTTGTAAATTTTCGAACATATTTCCCTAAAGAAAAAATATGATTAATCT  
GGAAAAATTGGAAAATTATTTTTCAAATAAAAAACAAAGAAAAAAATGAAG  
AAAAACCTATTAGTTTGGCCATAAAACGCAAAAATGTCGAAAATGACGTCAC  
TCATCTGCGCGGGAAATCAAGAATAATTCGGCCTTTTTTATTTTTTTGGAAAA  
TCGTAAAACATTTAGAAAAATTTTTTAATAGTTATAGTGGGACTGTATTCTGT  
CATTTAGGGCAAAGCCAGAGACGCTACTCCACCGTTGGGGGATCCACTAGT  
GAGTCGTATTAACCCAGCTTTTCTGTACAAAGTGGCTATAGAATCAAGCATGC  
TCCGCGTTTGCTGTACTATTTCTCGCAGAGCAGTTTTTTTTTCTCACACTTTATT  
ATTCTGTACTGCCCTCCACGCTATAATTTTTTGCATAGAGGGCCATAAAGGA  
AAACGGTACGGTAAAAATAATGGGTCCTTTTTACCGTTGTGTAGATTGTTTCT  
AACGGGATGCAAATTTTCACTAAAACCTCTGGAAAACCTGATGGAATTCTACGG  
GCAGCCGGCAATTTAGATATTTGAAGAATCCTTCTTGATCAGTGCCAAGCTT  
TCCCATGGACCAAAGATGTGGATCCAAGATCAAATGCACAGGATCTGAACTC  
CTTTGTTCCAAAAACAAGGATTTCTTTTCTATAGTTTGACCTAAATATTATAGT  
AGAACATATACATTTGATGATTTTATGAATAATTTATTGTTAAAAAATAATAC  
ATGTGTTAAAAAATAATTCTAAAAAATTAATTGGAGCGTCCTTGGCGGATAT  
GGCGGATTGGAAGGTCATAAGTAACTCGAACTAACCTGTAAATATAATTAAT  
TTAGAAGTAATCATTTTTGAAATGTTTCTAAATTTTTGTAAACGTAATCAATGA  
TTTACTTACAAAATTTTTCGAAATATTAGTAGAAATATAAAAAACAGTAAA  
ATTCAAAAGAGGCCAGCCACACATGCATCTTACAATACGAATGATGCGTTTT  
TTGTGCGCTCGGAGAAGGAATCAAGCAGGCTCCGCGTTTTCTGTACTATTTCT  
CCCAGAGCCGTTTATTTTTGCATAGGGGGTGGGTCATAAACGGAGACGTTTTG  
GTATAAAATTTGCCCTTCTTCCACCGTTGAAAAAATTGGAAAATGAACCGG  
GACAGGAAAGGGGATTTTCAAGATAATGGTTCAATTATCGATGCTACTGTCAT  
ATCTGAGTAGTGGATTTGAGCAAGGTTTCCAAATTTTGGAGTACAAGCGTCTAG  
TGCATGTGTCAAAAAGTCGGGCAAAAATTAGTTTTAATCAATAAGGTTTAA

AGATCAGAAATTTTTGTCTGACCTAATGGGCCGCAACTTTATTATACATAGTT  
GATAATTCACTGGCCGTCGTTTTACAACGTCGTGACTGGGAAAACCCTGGCGT  
TACCAACTTAATCGCCTTGCAGCACATCCCCCTTTCGCCAGCTGGCGTAATA  
GCGAAGAGGCCCGCACCGATCGCCCTTCCCAACAGTTGCGCAGCCTGAATGG  
CGAATGGCGCCTGATGCGGTATTTTCTCCTTACGCATCTGTGCGGTATTTAC  
ACCGCATATGGTGCCTCTCAGTACAATCTGCTCTGATGCCGCATAGTTAAGC  
CAGCCCCGACACCCGCCAACACCCGCTGACGCGCCCTGACGGGCTTGTCTGC  
TCCCGGCATCCGCTTACAGACAAGCTGTGACCGTCTCCGGGAGCTGCATGTG  
TCAGAGGTTTTACCGTCAACCGAAACGCGCGAGACGAAAGGGCCTCGTG  
ATACGCCTATTTTTATAGGTTAATGTCATGATAATAATGGTTTCTTAGACGTC  
AGGTGGCACTTTTCGGGGAAATGTGCGCGGAACCCCTATTTGTTATTTTTCT  
AAATACATTCAAATATGTATCCGCTCATGAGACAATAACCCTGATAAATGCTT  
CAATAATATTGAAAAAGGAAGAGTATGAGTATTCAACATTTCCGTGTGCC  
TTATTCCTTTTTTTCGGGCATTTTGCCTTCCTGTTTTTGTCTACCCAGAAACGC  
TGGTGAAAGTAAAAGATGCTGAAGATCAGTTGGGTGCACGAGTGGGTTACAT  
CGAACTGGATCTCAACAGCGGTAAGATCCTTGAGAGTTTTCGCCCCGAAGAA  
CGTTTTCCAATGATGAGCACTTTTAAAGTTCTGCTATGTGGCGCGGTATTATC  
CCGTATTGACGCCGGGCAAGAGCAACTCGGTCCGCCATACACTATTCTCAG  
AATGACTTGGTTGAGTACTCACCAGTCACAGAAAAGCATCTTACGGATGGCA  
TGACAGTAAGAGAATTATGCAGTGCTGCCATAACCATGAGTGATAAACTGC  
GGCCAACTTACTTCTGACAACGATCGGAGGACCGAAGGAGCTAACCCTTTT  
TTGCACAACATGGGGGATCATGTAACCTCGCCTTGATCGTTGGGAACCGGAGC  
TGAATGAAGCCATACCAAACGACGAGCGTGACACCACGATGCCTGTAGCAAT  
GGCAACAACGTTGCGCAAACCTATTAACCTGGCGAACTACTTACTCTAGCTTCCC  
GGCAACAATTAATAGACTGGATGGAGGCGGATAAAGTTGCAGGACCACTTCT  
GCGCTCGGCCCTTCCGGCTGGCTGGTTTATTGCTGATAAATCTGGAGCCGGTG  
AGCGTGGGTCTCGCGGTATCATTGCAGCACTGGGGCCAGATGGTAAGCCCTC  
CCGTATCGTAGTTATCTACACGACGGGGAGTCAGGCAACTATGGATGAACGA  
AATAGACAGATCGCTGAGATAGGTGCCTCACTGATTAAGCATTGGTAACCTGT  
CAGACCAAGTTTACTCATATATACTTTAGATTGATTTAAAACCTTCATTTTTAAT  
TTAAAAGGATCTAGGTGAAGATCCTTTTTTGATAATCTCATGACCAAAAATCCCT  
TAACGTGAGTTTTCGTTCCACTGAGCGTCAGACCCCGTAGAAAAGATCAAAG  
GATCTTCTTGAGATCCTTTTTTTCTGCGCGTAATCTGCTGCTTGCAAACAAA  
AAACCACCGCTACCAGCGGTGGTTTTGTTTGCCGGATCAAGAGCTACCAACTC  
TTTTTCCGAAGGTAACCTGGCTTCAGCAGAGCGCAGATAACCAAATACTGTCCTT  
CTAGTGTAGCCGTAGTTAGGCCACCACTTCAAGAACTCTGTAGCACCCGCTA  
CATACTCGCTCTGCTAATCCTGTTACCAGTGGCTGCTGCCAGTGGCGATAAG  
TCGTGTCTTACCGGGTTGGACTCAAGACGATAGTTACCGGATAAAGGCGCAGC  
GGTCCGGGCTGAACGGGGGGTTCGTGCACACAGCCCAGCTTGGAGCGAACGA  
CCTACACCGAACTGAGATACCTACAGCGTGAGCTATGAGAAAGCGCCACGCT  
TCCCGAAGGGAGAAAGGCGGACAGGTATCCGGTAAGCGGCAGGGTCGGAAC  
AGGAGAGCGCACGAGGGAGCTTCCAGGGGGAAACGCCTGGTATCTTTATAGT  
CCTGTCGGGTTTTGCCACCTCTGACTTGAGCGTCGATTTTTGTGATGCTCGTC  
AGGGGGGCGGAGCCTATGGAAAAACGCCAGCAACGCGGCCTTTTTACGGTTC  
CTGGTCTTTTGTGGCCTTTTGCTCACATGTTCTTCTGCGTTATCCCCTGAT

TCTGTGGATAACCGTATTACCGCCTTTGAGTGAGCTGATACCAGCGGATAAC  
AATTCACACAGGAAACAGCTATGACCATGATTACGCCAAGCTATCAACTTT

*p10882-rpr-1p:: tRNA<sup>Tyr</sup><sub>CUA</sub> 3x*

GTATAGAAAAGTTGCTGAGGGACTTCCAGCTGTCTGCGAGCCAGTCCAAAAG  
GGAGAGCCAGGATCCACCGGAGAGCCAGGACCAGTCGGACCACCAGGACCA  
TCCGGACAACCAGGAAACGACGGAACCCAGGTAATCATTTTCATAGTTTTTC  
AATCCATATCTAATCACCACATCTTTCAGGACAACCTGGACCAAAGGGACCA  
CCAGGACCAGACGGCAAGCCAGGAGCCGACGGAAACCCAGGACAGCCAGGA  
CCAGTCGGACCACCAGGAACCCAGGAGAGCGTGGAATCTGTCCAAAGTACT  
GCGCCATCGATGGAGGAATCTTCTTCGAGGACGGAACCTCGCCGCTAAGCGGA  
TCGCCTTTAATTTATTCTTTGCCTTATGCGTTGCTCAAATAAAACATTATTTT  
ATCCAAAATAATTTTTGAGGTTTTAGATGAATTTGATAGTTTAGCTTGTAC  
TTTCTCCTGTGCGAAGAACTTGCTAAGCAGGTAAGCAGCATCCTTATCAAGT  
TTCGACCTTATCTCTCAGTAGTCGCATACGTCGTATCCCTCATCTGCTTTGTTT  
TAGCCACTTCAAGGGAATTCAGATCACTTTTTCTCATGTGTTTTCAAATTTACT  
TTTGTGGAGTGACCTTAATTGACCCTCTCGTCATAAGTGGACGGTGGGTAGTT  
ACTTAACAAATTTTCGAGTACAGGATAGTGTCAATGGCATGAGACATGTAGTA  
GCCAAGCAATTATGGCGAATAAGTTTCAAAAACCAACATTCTGTCAAATACA  
AAGACCTGCAACATTAGAGAATTCATTAATAACATCTTCGAGGAAATCAAAT  
TTTCCCGTAGACGATCCCGTAGACCTACTTGTACAATATGTTCTAGATATA  
CTCCGAACCTTAAAATATCTCGAACATTTGTGTTGAATATTTATTTAATTCTAG  
GTTTTTCAAATTCGACGATTTTTGCCATACTACTGCCCAATAGTTTACATTT  
ATTGGGCCTGGATCTGTAAGGCACTTTTGGGAGCTCCCTTTCTTTTCCTTCAA  
ATTACCATAACAGATCTATAAATCACAATTTAATACAAGATTTTATTCAAGTT  
AAAAACATAAAAAGGGGCTTTGCGGTGGTCCCCATTTACCAGAGAACTATAA  
AAAATATAAATTTAACATCAAATGTTGCAATTGATTCCTCTCAAAGCTGCTT  
GAAGAACCCTGATTCTGTCAAGCCTATGAAGATTTAAAAAAAATTGGGAAGA  
CCCTTAGTTCCAACAAGTGTCGTTGACCCAGTAGGCGATATTCTGAAAAGTC  
ATAAAATGGGGTTGCTAAAAAATTGGTCGCTAACTTACATTTAGCTAGGAAT  
GTTAATTGGAATAACTCATAATTTACAGTAAAATTATCAAAAAATAGCAAAA  
ATCAATAGAGGACCGCTACACAGGCATCCAACAGTACGAGTTCTGCGTTTTT  
GAATTGCAAGTTTGTACAAAAAGCAGGCTCTTTGAGCCAATTTATCCAAGT  
CCTTGTA AAAAAGTATTCGAAAATTGTTAACGGATAAAAATGTTTATTATAAT  
CAAAAACAATTTGTCAGTTGACCACTTTTTGATATATTTGACAGAAACCGGGA  
TGAATTGGCTCAAAGTTAGGGCGCCCTTCTATTACAGGGTTTCTGATAACAAA  
CCGGTTATTA ACTCCCAACAAGGGATGATTTCAATTCATCATGCTCAAATTGA  
CCCAAATTAAGTTACATGACAAATTCATCGCCCTTTTCAACTCTTCTTGGCTC  
ATCATCTGTTATTCTGTTCTTATTCTGTCTGCACCCTATACCCCTTTGCATACT  
CTCTCGTCATTCCTTTCTTGGATAGTGTCTTCTTCTCCCAGCTCTGCTACTTCT  
ATGACTTGCGCCCGCTGCTTTTCCGCTCGTTCCTCTCCTCTCTGACGTCTTCTT  
CTGCTTCTTTTCTCCTTCTTTTTTCCCTTCTCAATCTTCTCTTTTTTCCCATTCT  
GTCAATCATTCGAAGAAGAAGAAGAAGACCCTCATTCAATTTCAATTTTTTT  
TTCTGTCGGTGTGTGCTGCTCGGTTAAGAGTGAGCTCTCTATTCCACGTCTTCT

TCTTTTTCTTCTTCGATTCTGAATCAATCACTCCACCAAAAACGCATTTCGTTTTTG  
GGATTCACCCCGCGGTTTCGCAACAGGTTTCTTTTTCAAATTATTAGCGTTATA  
AATAGAAAAATGGTGGAGTTTCAATAAAAAATGATAATTTACAAAGTGTATTT  
TGATTACATGTA CTCAAAAAGGTTGAAATTTTTCATACCAGTTTTCCGGAAAT  
CCATCTGATATCATTATCGTATTTTTCTTTTTAAAAATGTTTTCAAAAAAAAC  
AAAATATAGCTGGTTATTTGGCACCCCTCTAATTACCATTTTCTGTGCACACCA  
CACTCTTTTCCTTCTTCCACTTCTTTCCGTTTTTCAGCCGCTTCCAACCAAACCG  
ATATGAAAGCCGAGCAACAACAATCGATTCCACCCGGCTCGGCGACCTTCCC  
GTCGCAGGTGAGACTCAGAAA ACTAGAGAAACCGCTCAACTAACTCTTGATA  
TCCGATTTCAATTCTTTTCTTTTTCTTTTTGTTGAACTTTTCCATATTTCCAGAT  
GCCACGGCCACCACCAAGCACC GAACAAGGAATCACAACGGAATCGGAGCT  
TGCGAAGAAAGCTCAAATCACTCCGAACGACGTTTTAGCACTTCCGGGAATC  
ACTCAAGGTATCTTGCTCCCTTTGGATTTTCAGTTTAAAACATAAATTTAGGAT  
TCTTATGCTCCCCATCTGCGAACATCTATAACATCGAGTTCACCAAGTTCCAA  
ATCCGTGATCTGGACACTGAGCAAGTGCTTTTCGAGATCGCCAAACCGGAGA  
ACGATCAGGAGAATGATGAGTCGCCACAGGAGTCGGCAAGATACGTGCGTTA  
TAGATTTGCTCCAACTTTTTGAACTCAAACGGTCGGAGCAACTGTGGAA  
TTCAAAGTAGGAGACATCCCAATCCATCATTTCGGAATGATCGAACGTCACTT  
CTTCAAAGATCGCCTTCTGAAGTGTTTTGACTTTGAATTCGGATTCTGTATTCC  
GAATTCACGAAACA ACTGTGAACATATCTATGAGTTCCTCAACTCTCTCAAC  
AACTCAGTGAGTCATTATTCTAAAAAGTACAATTCAAAGACTAATCTCTTTT  
TCAGTGGACGACATGATCAACAATCCAAACGAGACTCGTTCTGACAGCTTCT  
ATTTCTGTCGATAACAAACTCGTCATGCACAACAAGCCGACTACTCATATGA  
TGCATAAATATTTAATACAAAAATGTTCTGGATAATTATTCTGTGCAATAGAA  
AAAAACTCCAAATGTGATTAAATTCCAATAATTCCTGTCTAGTTTGTTCCCT  
CCCCTTCCCCTTCTCATGTTCAATGCATTCCTAAGCTTTTCAGTTCCCCCCTTG  
TTTCTATATTTTTTCGCTGTCCTGTCACACTCGCTAAAAACACTAATCACACG  
GAAATCTGTTTTCAATAAAA ACTCCA ACTTTAACTCATTTTCAATTTCAACTG  
AAAGATTTTTTTCATTAGAGAATGTCTAGAACTAGGCCCGGGCTACGTAATAC  
GACTCACTTAAGGCCTTGACTAGAGGGTACCAGAGCTCACCTAGGCAGGAAC  
AGCTATGACCATGATTACGCCAAGCTATCAACTTTGTATAGAAAAGTTGGGC  
TCAGCCTCAACCAATTTTTAGTGTTAAAAATTTGATTTTTTTCAGTTAAAAACG  
ATGGTTTTTGATGCTTTTTACCTATTTTACAGATAGAAAATTTTAAATTTTCGCA  
AAAATCTTTAAAAATAAACTTTTTTGTGTTGGTTTTTCGCTCGAAAATAGCTTTA  
AATTTGCAGTTTTTCTCTCAAAA ACTCTAAATTTTCATGCGTTCCACGTGGCTTT  
CTATCAATTTAAATACTAATATTAATATTTTCTTCAAATCTGCCACGTTACA  
GCCTGCCATAGCCTTCTGAAACTCTACAATTCCTCTAATCACTAGCGCCGC  
CTCCCCGCACACTCAACACAGCGAGCGGCGGAACCCGCGGGGTGTCGGCCGC  
TCGGACACGCTCCCGTATATAACGACGCGGCGCGGTGGATCCCCGGTGGGG  
TTCCCGAGCGGCCAAAGGGAGCAGACTCTAAATCTGCCGTCATCGACTTCGA  
AGGTTCGAATCCTTCCCCCACCATATCTTTTTGAATTTACAGCATTTTTCATCA  
AGTTTGTACAAAAAAGCAGGCTGGCTCAGCCTCAACCAATTTTTAGTGTTAA  
AAATTTGATTTTTTTCAGTTAAAAACGATGGTTTTTGATGCTTTTTACCTATTTT  
ACAGATAGAAAATTTTAAATTTTCGCAAAAATCTTTAAAAATAAACTTTTTTGT  
TTGGTTTTTCGCTCGAAAATAGCTTTAAATTTGCAGTTTTTCTCTCAAAA ACTCT  
AAATTTTCATGCGTTCCACGTGGCTTTCTATCAATTTAAATACTAATATTAATA

TTTTCTTCAAAATCTGCCACGTTACAGCCTGCCATAGCCTTCTGAAACTCTAC  
AATTCCCCTCTAATCACTAGCGCCGCTCCCCGCACACTCAACACAGCGAGC  
GGCGGAACCCGCGGGGTGTCGGCCGCTCGGACACGCTCCCGTATATAACGAC  
GCGGCGCGCGTGGATCCCCGGTGGGGTTCGAGCGGCCAAAGGGAGCAGA  
CTCTAAATCTGCCGTCATCGACTTCGAAGGTTTGAATCCTTCCCCCACCATAT  
CTTTTTGAATTTACAGCATTTTTCATACCCAGCTTTCTTGTACAAAGTGGGGCT  
CAGCCTCAACCAATTTTTAGTGTTAAAAATTTGATTTTTTCAGTTAAAAACGA  
TGGTTTTTGTGCTTTTTACCTATTTTACAGATAGAAAATTTTAAATTTTCGCAA  
AAATCTTTAAAAATAAACTTTTTTGTGGTTTTTCGCTCGAAAATAGCTTTAA  
ATTTGCAGTTTTTCTCTCAAAAACCTCTAAATTTTCATGCGTTCACGTGGCTTTC  
TATCAATTTAAATACTAATAATTAATTTTTCTTCAAAATCTGCCACGTTACAG  
CCTGCCATAGCCTTCTGAAACTCTACAATTTCCCTCTAATCACTAGCGCCGCC  
TCCCCGCACACTCAGGATCCCCGGTGGGGTTCGAGCGGCCAAAGGGAGCA  
GACTCTAAATCTGCCGTCATCGACTTCGAAGGTTTGAATCCTTCCCCCACCAT  
ATCTTTTTGAATTTACAGCATTTTTCATCAACTTTATTATACATAGTTGATAAT  
TCACTGGCCGTCGTTTTACTCTCGAGACGTACGGTGCAGCGGATGCATTCGAA  
GATCTGCCCACTAGTGAGTCGTATTAACCCAGCTTTCTTGTACAAAGTGGCTA  
TAGAATCAAGCATGCTCCGCGTTTGTGTACTATTTCTCGCAGAGCAGTTTTT  
TTTCTCACACTTTATTATTCTGTACTGCCCTCCACGCTATAATTTTTTGCATA  
GAGGGCCATAAAGGAAAACGGTACGGTAAAAATAATGGGTCCTTTTTACCCT  
TGTGTAGATTGTTTTCTAACGGGATGCAAATTTTCACTAAAACCTCTGGAAAAC  
GATGGAATTTACGGGCAGCCGGCAATTTTAGATATTTGAAGAATCCTTCTTG  
ATCAGTGCCAAGCTTTCCCATGGACCAAAGATGTGGATCCAAGATCAAATGC  
ACAGGATCTGAACTCCTTTGTTCCAAAACAAGGATTTCTTTTCTATAGTTTG  
ACCTAAATATTATAGTAGAACATATACATTTGATGATTTTCATGAATAATTTAT  
TGTTAAAAATAAATACATGTGTTAAAAATAATTCTAAAAATAATTGGAG  
CGTCTTGGCGGATATGGCGGATTGGAAGGTCATAAGTAACTCGAACTAACC  
TGTAATATAATTAATTTAGAAGTAATCATTTTGAAATGTTTCTAAATTTTTGT  
AAACGTAATCAATGATTTACTTACAAAATTTTTTCGAAATATTAGTAGAAATAT  
AAAAAACAGTAAAATTCAAAGAGGCCAGCCACACATGCATCTTACAATAC  
GAATGATGCGTTTTTTGTGCGCTCGGAGAAGGAATCAAGCAGGCTCCGCGTTT  
TCTGTACTATTTCTCCCAGAGCCGTTTATTTTGCATAGGGGGTGGGTCATAAA  
CGGAGACGTTTTTGGTATAAAATTTGCCCTTCTTCCACCGTTGAAAAAATTGG  
AAAATGAACCGGGACAGGAAAGGGGATTTTCAGGATAATGGTTCAATTATCGA  
TGCTACTGTATATCTGAGTAGTGATTTGAGCAAGGTTTCCAAATTTTGAGT  
ACAAGCGTCTAGTGCATGTGTCAAAAAGTCGGGCAAAAATAGTTTTAATC  
AATAAGGTTTAAAGATCAGAAATTTTTGTCTGACCTAATGGGCCGCAACTTTA  
TTATACATAGTTGATAATTTACTGGCCGTCGTTTTACAACGTCGTGACTGGGA  
AAACCCTGGCGTTACCCAACCTAATCGCCTTGCAGCACATCCCCCTTTCGCCA  
GCTGGCGTAATAGCGAAGAGGCCCGCACCGATCGCCCTTCCCAACAGTTGCG  
CAGCCTGAATGGCGAATGGCGCCTGATGCGGTATTTTCTCCTTACGCATCTGT  
GCGGTATTTACACCGCATATGGTGCCTCTCAGTACAATCTGCTCTGATGCC  
GCATAGTTAAGCCAGCCCCGACACCCGCCAACACCCGCTGACGCGCCCTGAC  
GGGCTTGTCTGCTCCCGGCATCCGCTTACAGACAAGCTGTGACCGTCTCCGGG  
AGCTGCATGTGTCAGAGGTTTTTACCCTCATCACCGAAACGCGCGAGACGAA  
AGGGCCTCGTGATACGCCTATTTTTATAGGTTAATGTCATGATAATAATGGTT

TCTTAGACGTCAGGTGGCACTTTTCGGGGAAATGTGCGCGGAACCCCTATTTG  
TTTATTTTTCTAAATACATTCAAATATGTATCCGCTCATGAGACAATAACCT  
GATAAATGCTTCAATAATATTGAAAAAGGAAGAGTATGAGTATTCAACATTT  
CCGTGTCGCCCTTATCCCTTTTTTGGCGCATTTTGCCTTCCTGTTTTTGCTCAC  
CCAGAAACGCTGGTGAAAGTAAAAGATGCTGAAGATCAGTTGGGTGCACGA  
GTGGGTTACATCGAACTGGATCTCAACAGCGGTAAGATCCTTGAGAGTTTTTC  
GCCCCGAAGAACGTTTTTCCAATGATGAGCACTTTTAAAGTTCTGCTATGTGGC  
GCGGTATTATCCCGTATTGACGCCGGGCAAGAGCAACTCGGTCGCCGCATAC  
ACTATTCTCAGAATGACTTGGTTGAGTACTCACCAGTCACAGAAAAGCATCTT  
ACGGATGGCATGACAGTAAGAGAATTATGCAGTGCTGCCATAACCATGAGTG  
ATAACACTGCGGCCAACTTACTTCTGACAACGATCGGAGGACCGAAGGAGCT  
AACCGCTTTTTTGCACAACATGGGGGATCATGTAACCTCGCCTTGATCGTTGGG  
AACCGGAGCTGAATGAAGCCATAACCAAACGACGAGCGTGACACCACGATGC  
CTGTAGCAATGGCAACAACGTTGCGCAAACCTATTAACCTGGCGAACTACTTAC  
TCTAGCTTCCCGGCAACAATTAATAGACTGGATGGAGGCGGATAAAGTTGCA  
GGACCACTTCTGCGCTCGGCCCTTCCGGCTGGCTGGTTTTATTGCTGATAAATC  
TGGAGCCGGTGAGCGTGGGTCTCGCGGTATCATTGCAGCACTGGGGCCAGAT  
GGTAAGCCCTCCCGTATCGTAGTTATCTACACGACGGGGAGTCAGGCAACTA  
TGGATGAACGAAATAGACAGATCGCTGAGATAGGTGCCTCACTGATTAAGCA  
TTGGTAACCTGTCAGACCAAGTTTACTCATATATACTTTAGATTGATTTAAAC  
TTCATTTTTAATTTAAAAGGATCTAGGTGAAGATCCTTTTTGATAATCTCATG  
ACCAAAATCCCTTAACGTGAGTTTTTCGTTCCACTGAGCGTCAGACCCCGTAGA  
AAAGATCAAAGGATCTTCTTGAGATCCTTTTTTTCTGCGCGTAATCTGCTGCT  
TGCAAAACAAAAAACCACCGCTACCAGCGGTGGTTTTGTTGCCGGATCAAGA  
GCTACCAACTCTTTTTCCGAAGGTAACCTGGCTTCAGCAGAGCGCAGATACCA  
AATACTGTCCTTCTAGTGTAGCCGTAGTTAGGCCACCACTTCAAGAACTCTGT  
AGCACCGCCTACATACCTCGCTCTGCTAATCCTGTTACCAGTGGCTGCTGCCA  
GTGGCGATAAAGTCGTGTCTTACCGGGTTGGACTCAAGACGATAGTTACCGGA  
TAAGGCGCAGCGGTCGGGCTGAACGGGGGGTTTCGTGCACACAGCCCAGCTTG  
GAGCGAACGACCTACACCGAACTGAGATACCTACAGCGTGAGCTATGAGAA  
AGCGCCACGCTTCCCGAAGGGAGAAAGGCGGACAGGTATCCGGTAAGCGGC  
AGGGTCGGAACAGGAGAGCGCACGAGGGAGCTTCCAGGGGGAAACGCCTGG  
TATCTTTATAGTCCTGTGCGGTTTTCGCCACCTCTGACTTGAGCGTCGATTTTTG  
TGATGCTCGTCAGGGGGGCGGAGCCTATGGAAAAACGCCAGCAACGCGGCC  
TTTTTACGGTTCCTGGTCTTTTGGCTGGCCTTTTGTCTACATGTTCTTTCCTGCGT  
TATCCCCTGATTCTGTGGATAACCGTATTACCGCCTTTGAGTGAGCTGATACC  
AGCGGATAACAATTTACACAGGAAACAGCTATGACCATGATTACGCCAAGC  
TATCAACTTT

*p4348-unc-54p::JF LuciferaseTAG158::H2B::GFP*

GTATAGAAAAGTTGCCCATAAAATCCCGAAACTCCTTCCCTCTATCTTCTTTT  
TCTTCTCGTTTTCAAATGTTTCTCTCTATCCATTCTCTCATCAATTGAGTGGG  
ATGAGGCTATCTCTGCCTCTTCTGAATCTCTGAACCATCTTACATTACACTG  
TGGATGACGAGCCCCACAGGCTCCCTTGCATCAGATACTGCCATTGGGGATG  
GCAAAGAAGAGAGAAGGTATTGTGAGGATATATTTTTCTAAGAAAAACGTT



TGAAGAAAAGAAGATGAAGAAGATCTGCTTGATTTCATTGCACAAGTTAGAAG  
TAACAGGGGTCTATATTTTCGAAGAACTTAAAGGGAATGCAACTGAACATAAA  
ATTAACAAAGGGATTGAATCCTGCAGTGAGTATTTTCGGTTTTTCACTGGTT  
CTCTGTAAAAAGAGTAATGCAAAGGGCAAGTTAACTTAGGTCGTAATGTAT  
TGAATTTGCTTAAAATCTGAAGATCTAGTGGTGAACCGTGAAGATTATCAA  
GAGGAGGCTGAAGATCTGTTTAAAGAACCATTAATCAAACCTGGTATTCTATTTT  
CACTGGTTGTATGTAAACATTCTATCTTATTCCTTTTATCACTGTTCTGCACTT  
TCCTATAAAAAAAGTTGACCGACCGTACTCTCTGAATTCATTTTTCCCGATCT  
TACCAACTCCCGATCTATCTCTATCCCTGGTTTTTTCTTCGTGCTCCAATGGAA  
TTCTTGAGACTTCCACTATCTTCTCTGGCACCTCCACTACGCGTAGGCGTCT  
CTCGCTTCGTGTATTCCCGGGAAGCCGGTTCCTCGTCTCTCCCGCCGCTGCCGC  
TGCCGCACACAGCTTACACCTCGTAGAATCCCCAAAGAGGGGGCGTGGCTTG  
CGGGTGCCAACATCCTCCTGCCGAGGAAGAAGCAGGCACTCATCACTCGCAT  
CATCAACCTCGGGATTGGCCAAAGGACCCAAAGGTATGTTTCGAATGATACT  
AACATAACATAGAACATTTTCAGGAGGACCCTTGCAAGTTTGTACAAAAAAG  
CAGGCTGGTAGAAAAAACCATGGAAAACATGGAAAATGATGAAAACATTG  
TGGTTGGCCCGAAACCGTTTTATCCGATCGAAGAAGGTAGCGCGGGCACCCA  
GCTGCGTAAATATATGGAACGCTATGCCAAACTGGGTGCAATTGCATTCACC  
AATGCGGTTACCGGCGTGGATTATAGCTATGCCGAATATCTGGAAAAAAGCT  
GCTGTCTGGGTAAAGCACTGCAGAACTATGGCCTGGTTGTCGATGGTTCGTATC  
GCACTGTGCAGCGAAAATTGTGAAGAATTTTTATTCCGGTGATCGCGGGCCT  
GTTTATCGGTGTTGGCGTTGCCCGACCAACGAAATCTATACCCTGCGCGAAC  
TGGTGCATAGCCTGGGTATTAGCAAACCGACCATCGTTTTTCAGCTCTAAAAA  
AGGCCTGGATAAAGTTATTACCGTGCAGAAAACCGTTACCACCATCAAACC  
ATTGTTATCCTGGATAGCAAATAGGATTATCGTGGTTATCAGTGCCTGGATAC  
CTTTATTAACGCAATACCCCGCCGGGCTTCCAGGCAAGCAGCTTTAAAACC  
GTTGAAGTTGATCGTAAAGAACAGGTGGCACTGATCATGAACAGCAGCGGTT  
CTACCGGCCTGCCGAAAGGTGTTTCACTGACCCACGAAAATATTGTTACCCG  
CTTACGCCATGCGCGTGATCCGATCTATGGCAACCAAGTGAGCCCGGGTACC  
GCCGTTCTGACCGTTGTGCCGTTTCATCACGGTTTCGGCATGTTTACCACCCT  
GGGCTATCTGATTTGTGGTTTCCGCGTTGTTATGCTGACCAAATTTGATGAAG  
AAACCTTCCTGAAAACCCTGCAGGATTATAAATGCACCAGCGTGATCCTGGT  
TCCGACCCTGTTTGCAATTCTGAATAAAAGCGAACTGCTGAACAAATATGAT  
CTGAGCAATCTGGTTGAAATCGCAAGCGGCGGTGCGCCGCTGAGCAAAGAAG  
TGGGCGAAGCCGTTGCACGTCGCTTCAACCTGCCGGGTGTTTCGTCAGGGCTAT  
GGTCTGACCGAAACCACCAGCGCAATTATCATTACCCCGGAAGGCGATGATA  
AACCGGGTGCGAGCGGCAAAGTGGTTCCGCTGTTTAAAGCCAAAGTTATCGA  
TCTGGATACCAAAAAATCGCTGGGTCCGAATCGCCGTGGCGAAGTGTGTGTT  
AAAGGTCGGATGCTGATGAAAGGCTATGTTAACAATCCGGAAGCAACCAAAG  
AACTGATTGATGAAGAAGGTTGGCTGCACACCGGCGATATCGGTTATTATGA  
TGAAGAAAAACATTTCTTTATTGTGGATCGCCTGAAAAGCCTGATCAAATAT  
AAAGGCTATCAGGTTCCGCGGCAGAACTGGAAAGCGTTCTGCTGCAGCACC  
CGAGCATTTTTGATGCGGGTGTGGCCGGCGTTCCTGATCCAGTGGCAGGTGA  
ACTGCCGGGCGCGGTTGTGGTTCTGGAAAGCGGTAAAAACATGACCGAAAAA  
GAAGTGATGGATTATGTTGCCAGCCAAGTGAGCAATGCAAAACGTCTGCGCG  
GCGGTGTTTCGTTTTGTGGATGAAGTGCCGAAAGGCCTGACCGGTAAAATCGA

TGGCCGCGGATTCGTGAAATTCTGAAAAACCGGTGGCCAAAATGGGCTCC  
TCTGGCGGCCGCGACTACAAGGATGACGATGACAAGGATTACAAAGACGAC  
GATGATAAGGACTATAAGGATGATGACGACAAATAATAGCAATTCCTCGACG  
ACCCAGCTTTCTTGTACAAAGTGGGATAAATGCAAAATCCTTTCAAGCATTCC  
CTTCTTCTATCACTCTTCTTTCTTTTTGTCAAAAAATTCTCTCGCTAATTTAT  
TTGCTTTTTTAATGTTATTATTTTATGACTTTTTATAGTCACTGAAAAGTTTGC  
ATCTGAGTGAAGTGAATGCTATCAAAATGTGATTCTGTCTGATGTACTTTTAC  
AATCTCTCTTCAATTCCATTTTGAAGTGCTTTAAACCCGAAAGGTTGAGAAAA  
ATGCGAGCGCTCAAATATTTGTATTGTGTTTCGTTGAGTGACCCAACAAAAAG  
AGGAACTTTATTGTGCCGCAAGAAAAAGTCTCAGGTTGTATATTTATTCA  
TCTTATTGAATCTGCCATTTCTCGTTTTTGCAGTTTATATACCTTCCAATTT  
TCTTTCTATTGTATTTTCAACTTCTAATTTTAATTCAGGGAACTGCTTCAACG  
CATCATGAGTAAAGGAGAAGAACTTTTCACTGGAGTTGTCCCAATTCTTGTTG  
AATTAGATGGTGTGTTAATGGGCACAAATTTTCTGTGAGTGGAGAGGGTGA  
AGGTGATGCAACATACGGAAAACCTTACCCTTAAATTTATTTGCACTACTGGA  
AACTACCTGTTCCATGGGTAAGTTTAAACATATATACTAACTAACCTGA  
TTATTTAAATTTTCAAGCAACTTGTCACTACTTTCTGTTATGGTGTTCATG  
CTTCTCGAGATACCCAGATCATATGAAACGGCATGACTTTTTCAAGAGTGCCA  
TGCCCGAAGGTTATGTACAGGAAAGAACTATATTTTTCAAAGATGACGGGAA  
CTACAAGACACGTAAGTTTAAACAGTTCGGTACTAACTAACCATACATATTTA  
AATTTTCAAGGTGCTGAAGTCAAGTTTGAAGGTGATACCCTTGTTAATAGAATC  
GAGTTAAAAGGTATTGATTTTAAAGAAGATGGAAACATTCTTGGACACAAAT  
TGGAATACAACATAACTCACACAATGTATACATCATGGCAGACAAACAAAA  
GAATGGAATCAAAGTTGTAAGTTTAAACATGATTTTACTAACTAACTAATCTG  
ATTTAAATTTTCAAGAACTTCAAAATTAGACACAACATTGAAGATGGAAGCGT  
TCAACTAGCAGACCATTATCAACAAAATACTCCAATTGGCGATGGCCCTGTC  
CTTTTACCAGACAACCATTACCTGTCCACACAATCTGCCCTTTCGAAAGATCC  
CAACGAAAAGAGAGACCACATGGTCCTTCTTGAGTTTGTAAACAGCTGCTGGG  
ATTACACATGGCATGGATGAACTATACAAATGCCCCGGGGGATCGGTGGAGCT  
CCACCGGTGGCGGCCGCTCTAGAACTAGTCCACCAAAGCCATCTGCCAAGGG  
AGCCAAGAAGGCCGCAAGACCGTCTGTTGCCAAGCCAAAGGACGGAAAGAA  
GAGACGTCATGCCCGCAAGGAATCGTACTCCGTCTACATCTACCGTGTCTCA  
AGCAAGTTCACCCAGACACCGGAGTCTCCTCCAAGGCCATGTCTATCATGAA  
CTCCTTCGTCAACGATGTATTTCGAACGCATCGCTTCGGAAGCTTCCCGTCTTG  
CTCATTACAACAAACGCTCAACGATCTCATCCCGCGAAATTCAAACCGCTGT  
CCGTTTGATTCTCCCAGGAGAACTTGCCAAGCACGCCGTGTCTGAGGGAACC  
AAGGCCGTCACCAAGTACACTTCCAGCAAGTAAAATAACCCGCAATAGGATT  
CTTTTATCATCGAAATTTCTGTAGATTACTTACTTCAAATAATCATGCACACA  
GGTTGTCCCGTTAATTTCTTTCCTTCAATCTCTTTCTCTTTTACCTAGTCTGT  
GCCATTTCAATATGATTGCACCCCGGAAAATATCAAAAATTTCACTTAAACAA  
GTGATCCCATATTACAAAAATATTCAAATTCGAAAATCGAAAGATGCATTT  
CCGTTTTATTTTACCGAATTTTGTGTTTTTGTAAATGTGTTTAAACCCCTTTTA  
CAATTAACCTATTAATGTTTTGTTTTACTCATCTCACTTCCCCTTCTTACTTTGT  
GCTTATTTTATGTTTTAGGTTTTTTTATTGTATCATAAACTGGAAATTTTGAA  
ATAGGCTTCTTTCTCCCTAAACTTTTTTAAACAGGTAAGTGGTACATATC  
CTCTGCCCCACCCGCTCCAACCTCGTCTTTGTCTGTTTGTATACGAAATAC

AATTTTAAACGAGTATGCGGGTTTCTGTTAGCTTCAACAATACGATCATTCAA  
ATTTTAAAATTAAGAACTATAAAAGCACAGTATTTACGTGAGTTGAAACAA  
AATGCCTTCTCCAAATTTCTTAACACTGAAAAATTTTCGGAAAAAAGCAGA  
AATTACTCCGCAAAAAATTAAGGACATCATTCCAATATTTTTTTTTACTTATTT  
GATGAAAAATTAATATATTCCAATAAATTAATAATGAATTATCATCTCAGGAA  
TACTGTAGAATTACTTTCAACTTTATTATACATAGTTGATAATTCACTGGCCG  
TCGTTTTACACTCGAGACGTACGGTGC GCGGATGCATTCGAAGATCTGCCCA  
CTAGTGAGTCGTATTATAAGTGCAAGTAAGATCAGTGTGGTATTTTCAAGTAAT  
CAATTATTTTTTCGCTCCCCCTCCTCGCAAGTCGGCGATTTCTTTGAAGTTTTG  
TCAAAGAAGAGACAAGGACTTGATAGATACGCTCATCAGAGTGAGATTCAT  
TGCAAATAGTGTGTAATCGTGGAGAGACGAGAGAAAAGGTGTGAGAAGCT  
TAGAAGATAAAGAATAGGAAGAAGAACATATCTCATTTCCTATTTTCTCTAAT  
TTTTCGTTCATTTTTCTAGACATTACCCATTTGATGGTTTTTCAATATGGTTAT  
CAGGGTACTCATTTTTGGTAGTTTTCAAAGCAATTTGGAGTTTTTTTTTAAATTG  
TCAACTACAAAACGCAGCTTAAAGGTCCAAATATCATAGTATAAAAATTCT  
TTAAAAAATTCCAAATTTTATATGATTTTTTGAATAATTGGAAGAATGTTAGTT  
TTTGCCATTTTTTTGGAAGTTTTTCTCCGGATTTTATGGTACTTATATTTCAA  
TATAAATTTTTGTAGGAATTCGAGTATGCGAGAGAGCTATAGTTTACTAAAA  
AAAAGTGGCAAAAACCTCAGTAATTGCCACTTTTTTCAAAAATGTTTTGAAAA  
ATTTTACTATGATATTTGGCCATTTTGGCACCATATGTACGTTACTTTTTACGA  
AACACTCTAATTTTTGAAATTTGAGTTTCATGTTTAATCTTTTGTATAAAATTT  
TTATGGTCCTTTTGTGACAGGATAAAAAAATTGCAAAAAAATAGAAAACCTTG  
TTTCGTGAAAACACCTAGTTTAAAAAATTGTGGGCCACTTAGCGATTCTAGTCA  
AAAATCAGACAAATGTCAGCTGCCGTAACTTTTTCCGGATCAGGGTTATCAA  
ATTTAATTTTAATTGTAAATGTAGAAAATGATCGGCAACATTTTGCTAATT  
GAAAATATTTTGAATAATTGCTATAGTACATATTAATCTAGTATTAATATAGTA  
TTAATGTTATAATATCAGTTATGTGTTTGAATAACTCAAGCGTAAGTTTCCGT  
AAAATATCTTTAAATTTTTGGTAATTTTTTACGGTTTGGTATAAATTTTTGCATT  
TTTTGATTTTCTACACTTTTTTTCGATTTTCGCATTTTCCGAATTTCTCTGAAATA  
AATCGAACAATCGGAAAATTTTCGAGGGCACCCCTTAGCCATGCAGCTCAGGA  
ATTTGACTTTATGTTCCCATTCAAATTTTTTTAAAATTAATAAAAATGCTAATT  
GTAAGATAAATTACAAAATTATTAATCTCATCATCCTTATGATGATAGTGC  
AGTGCATGAATATATTTTTCCAAATAGGATATGATTCGTCGAGTAGCTTCACG  
TAATCCGTTTTTCTTCAATCACCATTTTCGAACTGCAATTTTTTTTTTTGGATTTTT  
GTAACAATATTGTCATAAATTGTGATTTTGTATTTTTGCGTAGAGCATCAGAA  
CCTTTCTGCTTTGAATTTAATGGGATTA AAAAATTATAAAAAACTTGCACCCT  
AATTAAGCGCGATACCTGGTGACCCATGGTCATAGCTGTTTCTGTGTGAAA  
TTGTTATCCGCTCACAATTCCACACAACATACGAGCCGGAAGCATAAAGTGT  
AAAGCCTGGGGTGCCTAATGAGTGAGCTAACTCACATTACATGTGAGCAAAA  
GGCCAGCAAAAGGCCAGGAACCGTAAAAAGGCCGCGTTGCTGGCGTTTTTCC  
ATAGGCTCCGCCCCCTGACGAGCATCACAAAATCGACGCTCAAGTCAGAG  
GTGGCGAAACCCGACAGGACTATAAAGATACCAGGCGTTTCCCCCTGGAAGC  
TCCCTCGTGCGCTCTCCTGTTCCGACCCTGCCGCTTACCGGATACCTGTCCGC  
CTTTCTCCCTTCGGGAAGCGTGGCGCTTTCTCATAGCTCACGCTGTAGGTATC  
TCAGTTCGGTGTAGGTTCGCTCCAAGCTGGGCTGTGTGCACGAACCCCC  
GTTTCAGCCCGACCGCTGCGCCTTATCCGGTAACTATCGTCTTGAGTCCAACCC

GGTAAGACACGACTTATCGCCACTGGCAGCAGCCACTGGTAACAGGATTAGC  
AGAGCGAGGTATGTAGGCGGTGCTACAGAGTTCTTGAAGTGGTGGCCTAACT  
ACGGCTACACTAGAAGAACAGTATTTGGTATCTGCGCTCTGCTGAAGCCAGT  
TACCTTCGGAAAAAGAGTTGGTAGCTCTTGATCCGGCAAACAAACCACCGCT  
GGTAGCGGTGGTTTTTTTTGTTTGAAGCAGCAGATTACGCGCAGAAAAAAG  
GATCTCAAGAAGATCCTTTGATCTTTTCTACGGGGTCTGACGCTCAGTGGAAC  
GAAAACCTCACGTAAAGGGATTTTGGTCATGAGATTATCAAAAAGGATCTTCA  
CCTAGATCCTTTTACGCGCCCTGTAGCGGCGCATTAAAGCGCGGGCGGGTGTGGT  
GGTTACGCGCAGCGTGACCGCTACACTTGCCAGCGCCCTAGCGCCCCTCCTT  
TCGCTTTCTTCCCTTCTTTCTCGCCACGTTTCGCTTTCCCGTCAAGCTCTAAA  
TCGGGGGCTCCCTTTAGGGTTCGGATTTAGTGCTTTACGGCACCTCGACCCCA  
AAAACTTGATTTGGGTGATGGTTCACGTAGTGGGCCATCGCCCTGATAGAC  
GGTTTTTCGCCCTTTGACGTTGGAGTCCACGTTCTTTAATAGTGGACTCTTGTT  
CCAAACTGGAACAACACTCAACCCTATCTCGGGCTATTCTTTTGATTTATAAG  
GGATTTTGCCGATTTTCGGCCTATTGGTTAAAAAATGAGCTGATTTAACAAAA  
TTAACCGCAATTTTAAACAAAATATTAACGTTTACAATTTAAATATTTGCTTA  
TACAATCTTCTGTTTTTTGGGGCTTTTCTGATTATCAACCGGGGTAATCAAT  
CTAAAGTATATATGAGTAAACTTGGTCTGACAGTTACCAATGCTTAATCAGTG  
AGGCACCTATCTCAGCGATCTGTCTATTTTCGTTTCATCCATAGTTGCCTGACTC  
CCCGTCGTGTAGATAACTACGATACGGGAGGGCTTACCATCTGGCCCCAGTG  
CTGCAATGATACCGCGAGACCCACGCTCACCGGCTCCAGATTTATCAGCAAT  
AAACCAGCCAGCCGGAAGGGCCGAGCGCAGAAGTGGTCCTGCAACTTTATCC  
GCCTCCATCCAGTCTATTAATTGTTGCCGGGAAGCTAGAGTAAGTAGTTCGCC  
AGTTAATAGTTTTCGCAACGTTGTTGCCATTGCTACAGGCATCGTGGTGTAC  
GCTCGTCGTTTGGTATGGCTTCATTCAGCTCCGGTTCCTAACGATCAAGGCGA  
GTTACATGATCCCCCATGTTGTGCAAAAAAGCGGTTAGCTCCTTCGGTCTCTCC  
GATCGTTGTCAGAAGTAAGTTGGCCGCAGTGTTATCACTCATGGTTATGGCAG  
CACTGCATAATTCTTACTGTTCATGCCATCCGTAAGATGCTTTTTCTGTGACTG  
GTGAGTACTCAACCAAGTCATTCTGAGAATAGTGTATGCGGCGACCGAGTTG  
CTCTTGCCCGCGTCAACACGGGATAATACCGCGCCACATAGCAGAACTTTA  
AAAGTGCTCATCATTGGAGAACGTTCTTCGGGGCGAAAACCTCTCAAGGATCT  
TACCGCTGTTGAGATCCAGTTCGATGTAACCCACTCGTGCACCCAACCTGATCT  
TCAGCATCTTTTACTTTACCAGCGTTTCTGGGTGAGCAAAAACAGGAAGGC  
AAAATGCCGCAAAAAAGGGAATAAGGGCGACACGGAAATGTTGAATACTCA  
TACTCTTCTTTTTCAATATTATTGAAGCATTATCAGGGTTATTGTCTCATGA  
GCGGATACATATTTGAATGTATTTAGAAAAATAAACAAATAGGGGTTCCGCG  
CACATTTCCCGAAAAGTGCCACCTGACGTAGTTAACAAAAAAGCCCGCC  
GAAGCGGGCTTTATTACCAAGCGAAGCGCCATTCGCCATTCAGGCTGCGCAA  
CTGTTGGGAAGGGCGATCGGTGCGGGCCTCTTCGCTATTACGCCAGCTGGCG  
AAAGGGGGATGTGCTGCAAGGCGATTAAGTTGGGTAACGCCAGGGTTTTCCC  
AGTCACGACGTTGTAAAACGACGGCCAGTTGATCAGTCGATCCAAGTGGGGA  
TCAGGAAGAAGTTGATAAAGTGATTCAAAAACCTCGAGGAGCTCAACACAGC  
GATGAACCCAATTTTGAAGCTATCCACCTGCCTGCCTGCCGCCTATTTCCATGTGCA  
GTAGGAACGTGTGTAGGTATAGGCAGGCATTATCGCGTCTCCTTTCGAACTAC  
CTAGTACCTAGTAGGTAGTTTGAAGGGAGGCGCGATAATGCCTGCCTATGTC

TACACATGTGCCTACTGCGCATGGAAATAGGCGGTAGTCAGGCAGGTAGATA  
GCCTCATAAAATTCAATACTTCCTTTTCAGAAAGAATGCTGGAATGTATTCAA  
AGAGGAGTCACTCTTCCCATTGCTCAGAGAATATGAAGAGTTGCTCGGCGAG  
CAAAAGTTCATGATTGGAGATCGATATTCATGGGCTGACATCGCTGTCTCG  
AGTTTCTAACTCGGTGTCAGCAGTGCTACGATAGCTTCTATCTGGCTCATTTC  
GAGAGGCTCCGAACCTTTTGGCCAGACTTTTGAGTCTCTTCCGCACATTTCGTCC  
CTACATTCAGGGACGTGTTGATTCAATTTATCTAATTTTTTAAAATGGATATTTT  
TCGTTTTTTTATTTGTTTTGTTTTGCTGATAATTCAATAAAGTTACGCAACGAATT  
TTAGACATTTATGAAAACCGAAAATCGACAAAAATATTTTAAGAAAAATAGC  
AGCAAAATTCAATATTTTATCAAATTTTGTTTTATGGTAATGAGAAAGAAAAC  
ATACAATATTTTCTAAGAAGAAGAAAAATGACCAGAATTTTAAGATTTTCT  
CGAATATACGAAAAATTGATAAACTAAAATTTTCGATTTTCCATTTATTTTG  
AAAAAAAACCTCTTGACGGTTTTCCACATGCGAAGAGGTGAGAAATATTCTG  
AAAGTTATGCATTTTGAAAAAATTGCAAAAAAATACGTTAAAATTTTTTGATC  
TATTGTTTTTTTTGAAAACCGGAATTTAAAATGGAATTTTTTTTCAAAAATTA  
AAATTAATAATTTAAATATTTCTAGTGTTGGATAGTTTTTCAAAGCTAGATT  
TAACCCGCGAGATGTCGACCGCTAGTGTAAGCTTACAGATGGCTGAAGACTTC  
GCAAAAATCTTATCTTAGAAACCCGCGAGGTGTCGGCCGCTAAAACCTTTGTA  
AACCTGCCAACAAAATGCTTCGCATTGTCTGAACAGATGAAACCTTGAACA  
AACATATACAATTGAAATCCCGTAAAGTGTCGGGCGCAAGAAGTGCATTGTA  
GTTGTATAATTGGACTAGCTCAAATTTGACCAAAAATCTCATTTTTAGACCTCT  
AAGATGTCGGCCACTATAACTTTATTCAACTTGAAACTGCAAAAAAATCTTATC  
AACTGTATAGATTCAAGTATTATGTCAAGTATTGGTTTTAGAGCTACAGTACA  
CTCTGATAACAAAATCTGCAGAAATACCTCCCTGTCAATTCCCAAAAATACCTC  
CCCTCATCTCAATTATCCCGAAAATCGGTTAGTCATTGCCATCAGAAAATCGA  
ATTA AAAAATAAAGATGAAATATGGTAGCAAACCTCACTTCGTCTTTGAGCCA  
ATTTATCCAAGTCCTTGTA AAAAAGTATTGCAAAAATTGTTAACGGATAAAAATGT  
TTATTATAATATCAAAAACAATTTGTCAGTTGACCACTTTTTGATATATTTGA  
CAGAAACCGGGATGAATTGGCTCAAAGTTAGGGCGCCCTTCTATTACAGGGT  
TTCTGATAACAAACCGGTTATTA ACTCCCAACAAGGGATGATTTCAATTCATC  
ATGCTCAAATTGACCCAAATTAAGTTACATGACAAAATTCATCGCCCTTTTCAA  
CTCTTCTGGCTCATCATCTGTTATTCTGTTCCCTATTCTGTCTGCACCCTATAC  
CCCTTTCGATACTCTCTCGTCATTCCCTTCTTGGATAGTGTCTTCTTCTCCCA  
GCTCTGCTACTTCTATGACTTGCGCCCGCTGCTTTTTCCGCTCGTTCCTCTCCTC  
TCTGACGTCTTCTTCTGCTTCTTTTCTCCTTCCCTTTTTCCCTTCTCAATCTTCT  
CTTTTTCCCATTTCTGTCAATCATTTCGAAGAAGAAGAAGAAGAAGACCCTCAT  
TCATTTCATTTTTTTTTCTGTCGGTGTGTGCTGCTCGGTTAAGAGTGAGCTCTC  
TATCCACGTCTTCTTCTTTTTCTTCTTCGATTCGAATCAATCACTCCACCAAA  
ACGCATTCGTTTTTTGGGATTCACCCCGCGGTTTCGCAATAGGTTTCTTTTTCAA  
ATTATTAGCGTTATAAATAGAAAAATGGTGGAGTTTCAATAAAAATGATAAT  
TTACAAAGTGATTTTTGATTACATGTA CTCAAAAAGGTTGAAATTTTTCATAC  
CAGTTTTCCGGAAATCCATCTGATATCATTATCGTATTTTTCTTTTTAAAATG  
TTTTCAAAAAAAAACAAAATATAGCTGGTTATTTGGCACCTCTAATTACCAT  
TTTCTGTACACCACTCTTTTCTTCTTCCACTTCTTCCGTTTTTCAGCCGC  
TTCCAACCAACCGATATGAAAGCCGAGCAACAACGATCGATTCCACCCGGC  
TCGGCGACCTTCCCGTCGCAGGTGAGACTCAGAAA ACTAGAGAAACCGCTCA

ACTAACTCTTGATATCCGATTTTCATTCTTTTCTCTTTTCTTTTGTGAACTTTT  
CCATATTTCCAGATGCCACGGCCACCACCAAGCACCGAACAAGGAATCACAA  
CGGAATCGGAGCTTGCGAAGAAAGCTCAAATCACTCCGAACGACGTTTTAGC  
ACTTCCGGGAATCACTCAAGGTATCTTGCTCCCTTTGGATTTTCAGTTTAAAC  
ATAAATTTAGGATTCTTATGCTCCCCATCTGCGAACATCTATAACATCGAGTT  
CACCAAGTTCCAAATCCGTGATCTGGACACTGAGCAAGTGCTTTTCGAGATC  
GCCAAACCGGAGAACGATCAGGAGAATGATGAGTCGCCACAGGAGTCGGCA  
AGATACGTGCGTTATAGATTTGCTCCAACTTTTTGAACTCAAAACGGTCGG  
AGCAACTGTGGAATTCAAAGTAGGAGACATCCCAATCCATCATTTCGAATG  
ATCGAACGTCACTTCTTCAAAGATCGCCTTCTGAAGTGTTTTGACTTTGAATT  
CGGATTCTGTATTCCGAATTCACGAAACAACTGTGAACATATCTATGAGTTCC  
CTCAACTCTCTCAACAACCTCAGTGAGTCATTATTCTAAAAAGTACAATTCAA  
AGACTAATCTCTTTTTTCAGTGGACGACATGATCAACAATCCAAACGAGACTC  
GTTCTGACAGCTTCTATTTTCGTCGATAACAAACTCGTCATGCACAACAAAGCC  
GACTACTCATATGATGCATAAATATTTAATACAAAAATGTTCTGGATAATTAT  
TCTGTCGAATAGAAAAAAACTCCAAATGTGATTAATTCCAATAATTCCTGT  
CTAGTTTGTTCCTTCCCCTTCCCCTTCTCATGTTCAATGCATTCCTAAGCTTTTC  
AGTTCCCCCTTGTTTCTATATTTTTTCGCTGTCCTGTCACACTCGCTAAAAAC  
ACTAATCACACGGAAATCTGTTTTCAATAAAAACTCCAACTTTAACTCATTTT  
CAATTTCAACTGAAAGATTTTTTCATTAGAGAATGTCTAGAACTAGGCCCGGG  
CTACGTAATACGACTCACTTAAGGCCTTGACTAGAGGGTACCAGAGCTCACC  
TAGGCAGGAACAGCTATGACCATGATTACGCCAAGCTATCAACTTT
